# Supplementary material
Source: PubMed Central journal article supplement (PMC6643647)
Supplement: ao8b02147_si_001.pdf [file ao8b02147_si_001.pdf]

## Supporting Information

### **Synthesis of Functionalized Thieno[2,3-*b*]indoles via One-pot Reaction of Indoline-2-thiones with Morita–Baylis–Hillman and Rauhut–Currier Adducts of Nitroalkenes**

Vaijinath Mane,<sup>a</sup> Thekke V. Baiju,<sup>a</sup> Irishi N. N. Namboothiri<sup>a\*</sup>

<sup>a</sup>Department of Chemistry, Indian Institute of Technology Bombay, Mumbai 400 076, India

E-mail: irishi@iitb.ac.in

| Entry | Table of Contents                                             | Page |
|-------|---------------------------------------------------------------|------|
| 1     | Table S1. Crystal data and structure refinement for <b>3a</b> | S5   |
| 2     | Table S2. Crystal data and structure refinement for <b>4h</b> | S7   |
| 3     | Table S3. Crystal data and structure refinement for <b>6e</b> | S9   |
| 4     | Figure S1. <sup>1</sup> H NMR Spectrum of <b>3a</b>           | S11  |
| 5     | Figure S2. <sup>13</sup> C NMR Spectrum of <b>3a</b>          | S12  |
| 6     | Figure S3. <sup>1</sup> H NMR Spectrum of <b>4a</b>           | S13  |
| 7     | Figure S4. <sup>13</sup> C NMR Spectrum of <b>4a</b>          | S14  |
| 8     | Figure S5. <sup>1</sup> H NMR Spectrum of <b>4b</b>           | S15  |
| 9     | Figure S6. <sup>13</sup> C NMR Spectrum of <b>4b</b>          | S16  |
| 10    | Figure S7. <sup>1</sup> H NMR Spectrum of <b>4c</b>           | S17  |
| 11    | Figure S8. <sup>13</sup> C NMR Spectrum of <b>4c</b>          | S18  |
| 12    | Figure S9. <sup>1</sup> H NMR Spectrum of <b>4d</b>           | S19  |
| 13    | Figure S10. <sup>13</sup> C NMR Spectrum of <b>4d</b>         | S20  |
| 14    | Figure S11. <sup>1</sup> H NMR Spectrum of <b>4e</b>          | S21  |
| 15    | Figure S12. <sup>13</sup> C NMR Spectrum of <b>4e</b>         | S22  |
| 16    | Figure S13. <sup>1</sup> H NMR Spectrum of <b>4f</b>          | S23  |
| 17    | Figure S14. <sup>13</sup> C NMR Spectrum of <b>4f</b>         | S24  |
| 18    | Figure S15. <sup>1</sup> H NMR Spectrum of <b>4g</b>          | S25  |
| 19    | Figure S16. <sup>13</sup> C NMR Spectrum of <b>4g</b>         | S26  |
| 20    | Figure S17. <sup>1</sup> H NMR Spectrum of <b>4h</b>          | S27  |

|    |                                                       |     |
|----|-------------------------------------------------------|-----|
| 21 | Figure S18. $^{13}\text{C}$ NMR Spectrum of <b>4h</b> | S28 |
| 22 | Figure S19. $^1\text{H}$ NMR Spectrum of <b>4i</b>    | S29 |
| 23 | Figure S20. $^{13}\text{C}$ NMR Spectrum of <b>4i</b> | S30 |
| 24 | Figure S21. $^1\text{H}$ NMR Spectrum of <b>6a</b>    | S31 |
| 25 | Figure S22. $^{13}\text{C}$ NMR Spectrum of <b>6a</b> | S32 |
| 26 | Figure S23. $^1\text{H}$ NMR Spectrum of <b>6b</b>    | S33 |
| 27 | Figure S24. $^{13}\text{C}$ NMR Spectrum of <b>6b</b> | S34 |
| 28 | Figure S25. $^1\text{H}$ NMR Spectrum of <b>6c</b>    | S35 |
| 29 | Figure S26. $^{13}\text{C}$ NMR Spectrum of <b>6c</b> | S36 |
| 30 | Figure S27. $^1\text{H}$ NMR Spectrum of <b>6d</b>    | S37 |
| 31 | Figure S28. $^{13}\text{C}$ NMR Spectrum of <b>6d</b> | S38 |
| 32 | Figure S29. $^1\text{H}$ NMR Spectrum of <b>6e</b>    | S39 |
| 33 | Figure S30. $^{13}\text{C}$ NMR Spectrum of <b>6e</b> | S40 |
| 34 | Figure S31. $^1\text{H}$ NMR Spectrum of <b>6f</b>    | S41 |
| 35 | Figure S32. $^{13}\text{C}$ NMR Spectrum of <b>6f</b> | S42 |
| 36 | Figure S33. $^1\text{H}$ NMR Spectrum of <b>6g</b>    | S43 |
| 37 | Figure S34. $^{13}\text{C}$ NMR Spectrum of <b>6g</b> | S44 |
| 38 | Figure S35. $^1\text{H}$ NMR Spectrum of <b>6h</b>    | S45 |
| 39 | Figure S36. $^{13}\text{C}$ NMR Spectrum of <b>6h</b> | S46 |
| 40 | Figure S37. $^1\text{H}$ NMR Spectrum of <b>6i</b>    | S47 |
| 41 | Figure S38. $^{13}\text{C}$ NMR Spectrum of <b>6i</b> | S48 |

|    |                                                                     |     |
|----|---------------------------------------------------------------------|-----|
| 42 | Figure S39. $^1\text{H}$ NMR Spectrum of <b>6j</b>                  | S49 |
| 43 | Figure S40. $^{13}\text{C}$ NMR Spectrum of <b>6j</b>               | S50 |
| 44 | Figure S41. $^{13}\text{C}$ -APT Spectrum of <b>6j</b>              | S51 |
| 45 | Figure S42. $^{19}\text{F}$ NMR Spectrum of <b>6j</b>               | S52 |
| 46 | Figure S43. $^1\text{H}$ NMR Spectrum of <b>6k</b>                  | S53 |
| 47 | Figure S44. $^{13}\text{C}$ NMR Spectrum of <b>6k</b>               | S54 |
| 48 | Figure S45. $^1\text{H}$ - $^1\text{H}$ -COSY Spectrum of <b>6k</b> | S55 |
| 49 | Figure S46. $^1\text{H}$ NMR Spectrum of <b>6l</b>                  | S56 |
| 50 | Figure S47. $^{13}\text{C}$ NMR Spectrum of <b>6l</b>               | S57 |
| 51 | Figure S48. $^1\text{H}$ NMR Spectrum of <b>6m</b>                  | S58 |
| 52 | Figure S49. $^{13}\text{C}$ NMR Spectrum of <b>6m</b>               | S59 |
| 53 | Figure S50. $^1\text{H}$ NMR Spectrum of <b>6n</b>                  | S60 |
| 54 | Figure S51. $^{13}\text{C}$ NMR Spectrum of <b>6n</b>               | S61 |
| 55 | Figure S52. $^1\text{H}$ NMR Spectrum of <b>6o</b>                  | S62 |
| 56 | Figure S53. $^{13}\text{C}$ NMR Spectrum of <b>6o</b>               | S63 |
| 57 | Figure S54. $^1\text{H}$ NMR Spectrum of <b>6p</b>                  | S64 |
| 58 | Figure S55. $^{13}\text{C}$ NMR Spectrum of <b>6p</b>               | S65 |
| 59 | Figure S56. $^1\text{H}$ NMR Spectrum of <b>6q</b>                  | S66 |
| 60 | Figure S57. $^{13}\text{C}$ NMR Spectrum of <b>6q</b>               | S67 |
| 61 | Figure S58. $^1\text{H}$ NMR Spectrum of <b>8</b>                   | S68 |
| 62 | Figure S59. $^{13}\text{C}$ NMR Spectrum of <b>8</b>                | S69 |

**Table S1.** Crystal data and structure refinement for compound **3a**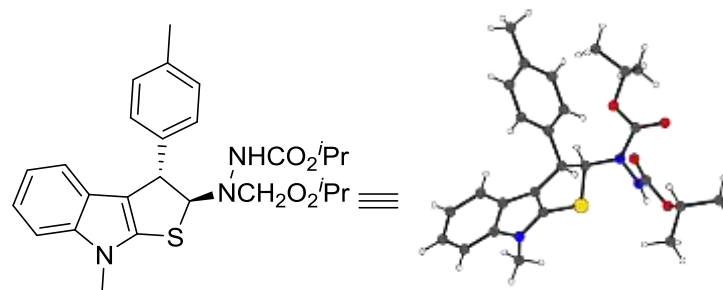

|                                |                                                                                                                                              |
|--------------------------------|----------------------------------------------------------------------------------------------------------------------------------------------|
| Identification code            | INN-MVD-798                                                                                                                                  |
| Empirical formula              | C <sub>26</sub> H <sub>31</sub> N <sub>3</sub> O <sub>4</sub> S                                                                              |
| Formula weight                 | 482.60                                                                                                                                       |
| Temperature                    | 150 K                                                                                                                                        |
| Wavelength                     | 0.71070 Å                                                                                                                                    |
| Crystal system,<br>space group | Triclinic<br>P -1                                                                                                                            |
| Unit cell dimensions           | $a = 11.08(2)$ Å $\alpha = 63.18(17)^\circ$<br>$b = 11.755(18)$ Å $\beta = 66.29(17)^\circ$<br>$c = 11.961(14)$ Å $\gamma = 71.29(18)^\circ$ |
| Volume                         | 1254(4) Å <sup>3</sup>                                                                                                                       |
| Z                              | 2                                                                                                                                            |
| Density (Calculated)           | 1.278 Mg/m <sup>3</sup>                                                                                                                      |
| Absorption coefficient         | 0.166 mm <sup>-1</sup>                                                                                                                       |

---

|                                         |                                                |
|-----------------------------------------|------------------------------------------------|
| F (000)                                 | 514                                            |
| Crystal size                            | <u>0.16</u> × <u>0.16</u> × <u>0.04</u> mm     |
| Theta range for data collection         | <u>3.1</u> to <u>25.0</u> °                    |
| Index ranges                            | -13<=h<=13, -13<=k<=13, -14<=l<=14             |
| Reflections collected                   | <u>15311</u>                                   |
| Independent reflections                 | 4396 [R(int) = <u>0.144</u> ]                  |
| Completeness to theta = 25 <sup>0</sup> | 99.7 %                                         |
| Absorption correction                   | Numerical                                      |
| Max. and min. transmission              | 0.989 and 0.997                                |
| Refinement method                       | Full-matrix least-squares on F <sup>2</sup>    |
| Data / restraints / parameters          | 4396 / 0 / 313                                 |
| Goodness-of-fit on F <sup>2</sup>       | 0.870                                          |
| Final R indices [I>2sigma (I)]          | R1 = 0.0621, wR2 = 0.1244                      |
| R indices (all data)                    | R1 = 0.1060, wR2 = 0.1519                      |
| Largest diff. peak and hole             | <u>0.35</u> and <u>-0.31</u> e.Å <sup>-3</sup> |

---

**Table S2.** Crystal data and structure refinement for compound **4h**

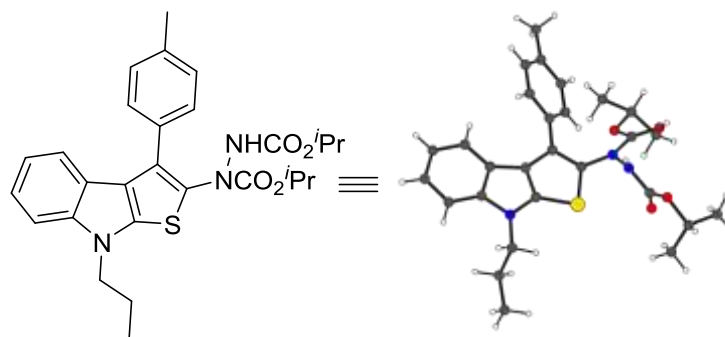

|                                |                                                                                                                                                             |
|--------------------------------|-------------------------------------------------------------------------------------------------------------------------------------------------------------|
| Identification code            | INN-MVD-796                                                                                                                                                 |
| Empirical formula              | C <sub>28</sub> H <sub>33</sub> N <sub>3</sub> O <sub>4</sub> S                                                                                             |
| Formula weight                 | 507.63                                                                                                                                                      |
| Temperature                    | 150 K                                                                                                                                                       |
| Wavelength                     | 0.71070 Å                                                                                                                                                   |
| Crystal system,<br>space group | Monoclinic<br>P 21/c                                                                                                                                        |
| Unit cell dimensions           | $a = 15.959(5) \text{ \AA}$ $\alpha = 90^\circ$<br>$b = 8.470(2) \text{ \AA}$ $\beta = 108.034(4)^\circ$<br>$c = 21.482(6) \text{ \AA}$ $\gamma = 90^\circ$ |
| Volume                         | 2761.1(13) Å <sup>3</sup>                                                                                                                                   |
| Z                              | 4                                                                                                                                                           |

---

|                                             |                                                |
|---------------------------------------------|------------------------------------------------|
| Density (Calculated)                        | 1.221 Mg/m <sup>3</sup>                        |
| Absorption coefficient                      | 0.154 mm <sup>-1</sup>                         |
| F (000)                                     | 1080.0                                         |
| Crystal size                                | <u>0.35</u> × <u>0.24</u> × <u>0.07</u> mm     |
| Theta range for data collection             | <u>3.1</u> to <u>29.2</u> °                    |
| Index ranges                                | -18<=h<=21, -9<=k<=11, -29<=l<=29              |
| Reflections collected                       | <u>37563</u>                                   |
| Independent reflections                     | <u>7432</u> [R(int) = <u>0.064</u> ]           |
| Completeness to theta = 29.165 <sup>0</sup> | 99.6 %                                         |
| Absorption correction                       | Numerical                                      |
| Max. and min. transmission                  | <u>0.989</u> , <u>0.963</u>                    |
| Refinement method                           | Full-matrix least-squares on F <sup>2</sup>    |
| Data / restraints / parameters              | 7432 / 0 / 331                                 |
| Goodness-of-fit on F <sup>2</sup>           | 1.102                                          |
| Final R indices [I>2sigma (I)]              | R1 = 0.0545, wR2 = 0.1192                      |
| R indices (all data)                        | R1 = 0.0701, wR2 = 0.1290                      |
| Largest diff. peak and hole                 | <u>0.40</u> and <u>-0.39</u> e.Å <sup>-3</sup> |

---



**Table S3.** Crystal data and structure refinement for compound **6e**

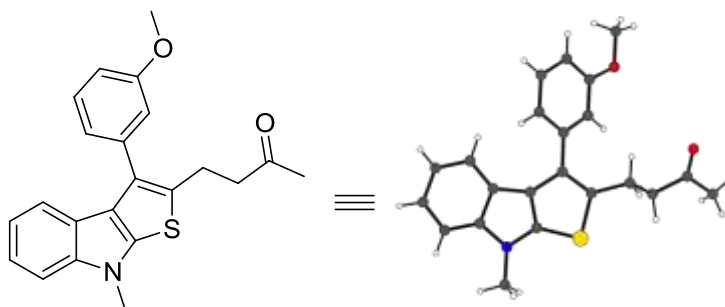

|                                |                                                                                                                                                               |
|--------------------------------|---------------------------------------------------------------------------------------------------------------------------------------------------------------|
| Identification code            | INN-MVD-611                                                                                                                                                   |
| Empirical formula              | C <sub>22</sub> H <sub>21</sub> NO <sub>2</sub> S                                                                                                             |
| Formula weight                 | 363.46                                                                                                                                                        |
| Temperature                    | 150 K                                                                                                                                                         |
| Wavelength                     | 0.71073 Å                                                                                                                                                     |
| Crystal system,<br>space group | Monoclinic<br>P 21/n                                                                                                                                          |
| Unit cell dimensions           | $a = 11.8883(3) \text{ \AA}$ $\alpha = 90^\circ$<br>$b = 7.4114(3) \text{ \AA}$ $\beta = 95.281(3)^\circ$<br>$c = 20.6224(7) \text{ \AA}$ $\gamma = 90^\circ$ |
| Volume                         | 1809.31(11) Å <sup>3</sup>                                                                                                                                    |
| Z                              | 4                                                                                                                                                             |

---

|                                           |                                                |
|-------------------------------------------|------------------------------------------------|
| Density (Calculated)                      | 1.334 Mg/m <sup>3</sup>                        |
| Absorption coefficient                    | 0.195 mm <sup>-1</sup>                         |
| F (000)                                   | 768                                            |
| Crystal size                              | <u>0.33</u> × <u>0.22</u> × <u>0.15</u> mm     |
| Theta range for data collection           | <u>2.0</u> to <u>25.0</u> °                    |
| Index ranges                              | -14<=h<=14, -8<=k<=8, -14<=l<=24               |
| Reflections collected                     | <u>8097</u>                                    |
| Independent reflections                   | 3169 [R(int) = <u>0.032</u> ]                  |
| Completeness to theta = 25.0 <sup>0</sup> | 99.6 %                                         |
| Absorption correction                     | Numerical                                      |
| Max. and min. transmission                | 0.960, 1.000                                   |
| Refinement method                         | Full-matrix least-squares on F <sup>2</sup>    |
| Data / restraints / parameters            | 3169 / 0 / 238                                 |
| Goodness-of-fit on F <sup>2</sup>         | 1.061                                          |
| Final R indices [I>2sigma (I)]            | R1 = 0.0354, wR2 = 0.0940                      |
| R indices (all data)                      | R1 = 0.0431, wR2 = 0.0986                      |
| Largest diff. peak and hole               | <u>0.23</u> and <u>-0.38</u> e.Å <sup>-3</sup> |

---

Current Data Parameters  
NAME INN-MVD-798-1H  
EXPNO 1  
PROCNO 1

F2 - Acquisition Parameters  
Date\_ 20160403  
Time 11.02  
INSTRUM spect  
PROBHD 5 mm PABBO BB/  
PULPROG zg30  
TD 65536  
SOLVENT CDCl3  
NS 25  
DS 2  
SWH 10000.000 Hz  
FIDRES 0.152588 Hz  
AQ 3.2767999 sec  
RG 30.72  
DW 50.000 usec  
DE 6.50 usec  
TE 294.7 K  
D1 1.00000000 sec  
TD0 1

===== CHANNEL f1 =====  
SFO1 500.1330885 MHz  
NUC1 1H  
P1 13.00 usec  
PLW1 13.00000000 W

F2 - Processing parameters  
SI 65536  
SF 500.1298708 MHz  
WDW EM  
SSB 0  
LB 0.30 Hz  
GB 0  
PC 1.00

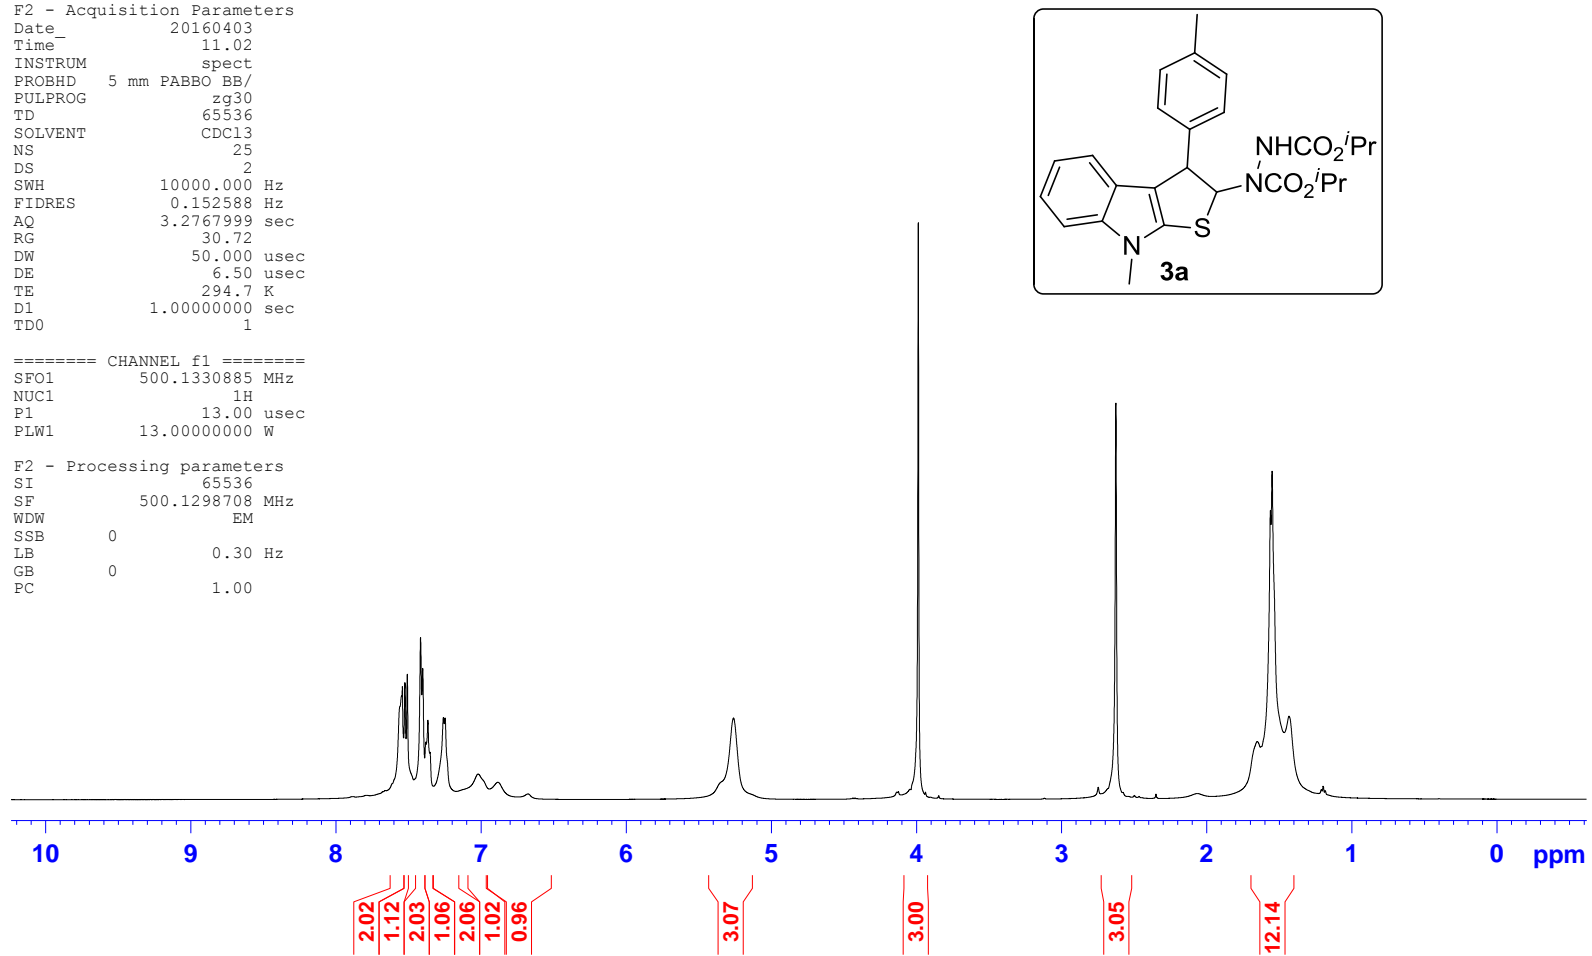

Figure S1.  $^1\text{H}$  NMR Spectrum of 3a

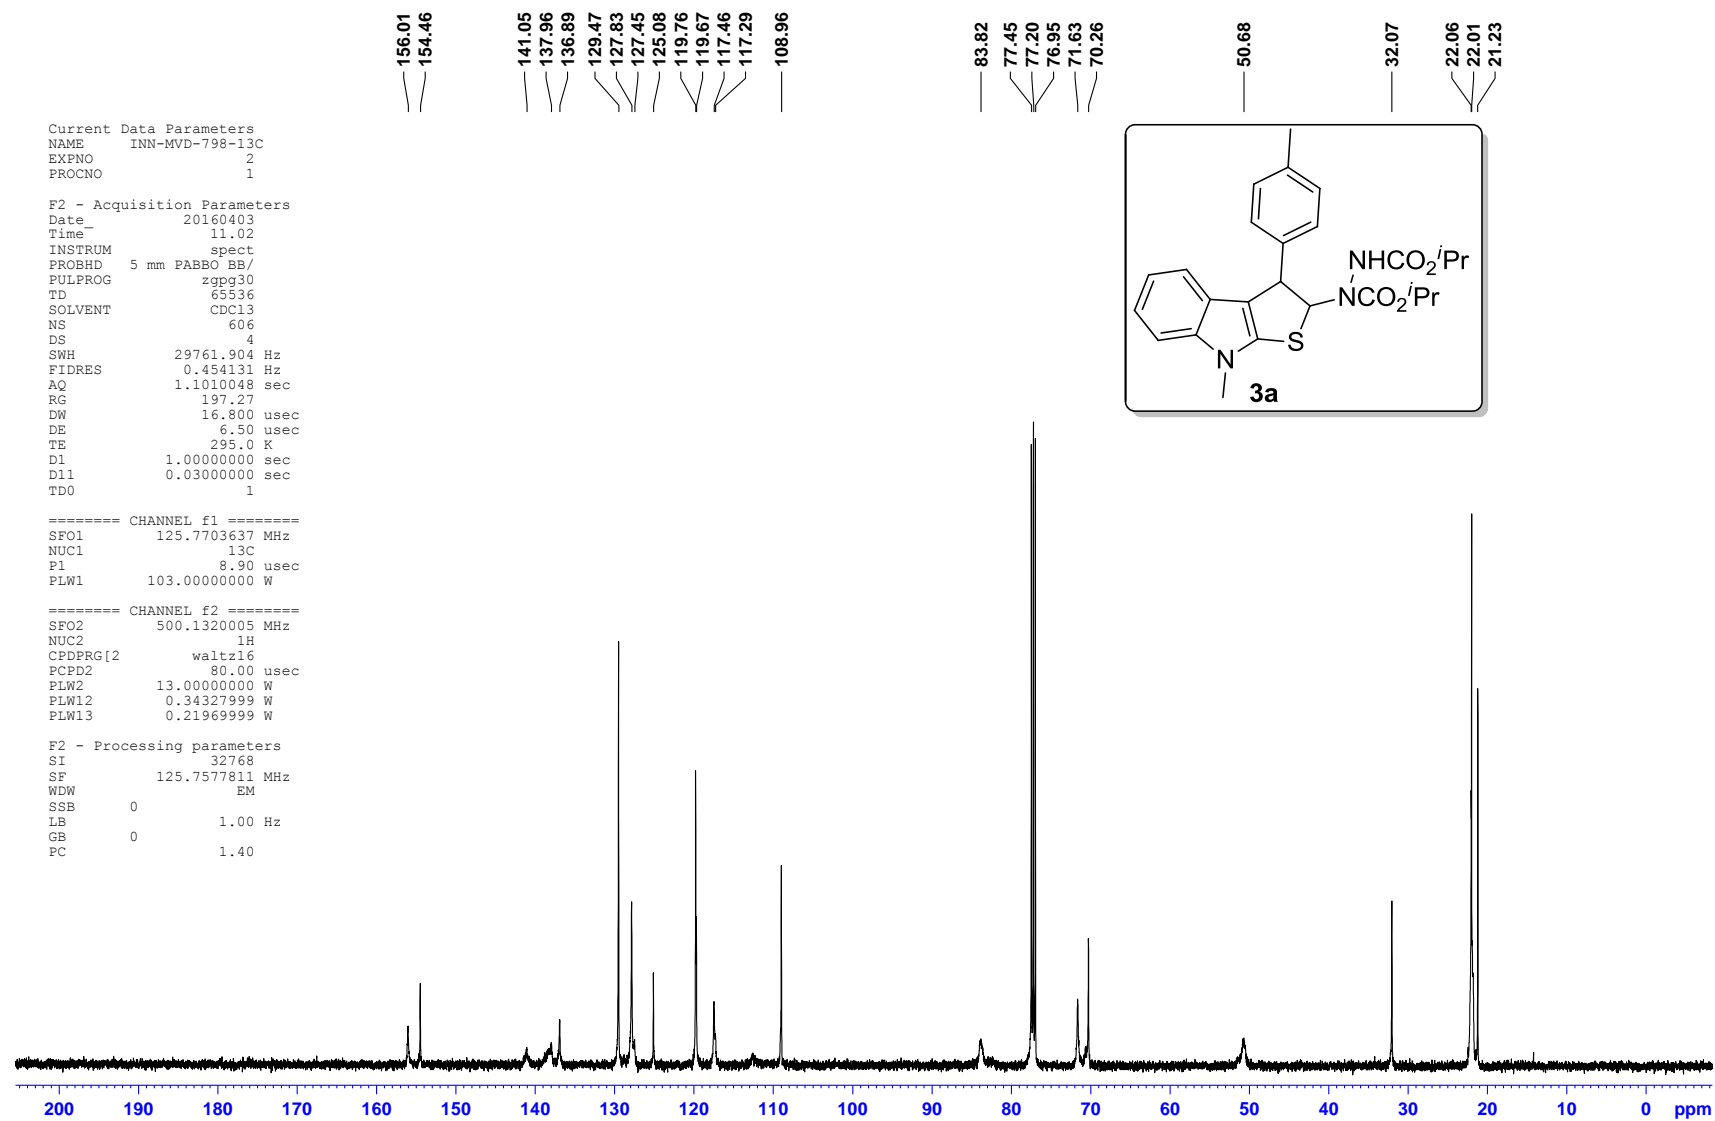

Figure S2. <sup>13</sup>C NMR Spectrum of 3a

Current Data Parameters  
NAME INN-MVD-770-1H  
EXPNO 13  
PROCNO 1

F2 - Acquisition Parameters  
Date\_ 20160308  
Time\_ 15.23  
INSTRUM spect  
PROBHD 5 mm PABBO BB/  
PULPROG zg30  
TD 65536  
SOLVENT CDC13  
NS 25  
DS 2  
SWH 10000.000 Hz  
FIDRES 0.152588 Hz  
AQ 3.2767999 sec  
RG 30.72  
DW 50.000 usec  
DE 6.50 usec  
TE 294.7 K  
D1 1.00000000 sec  
TDO 1

==== CHANNEL f1 =====  
SF01 500.1330885 MHz  
NUC1 1H  
P1 13.00 usec  
PLW1 13.00000000 W

F2 - Processing parameters  
SI 65536  
SF 500.1300120 MHz  
WDW EM  
SSB 0  
LB 0.30 Hz  
GB 0  
PC 1.00

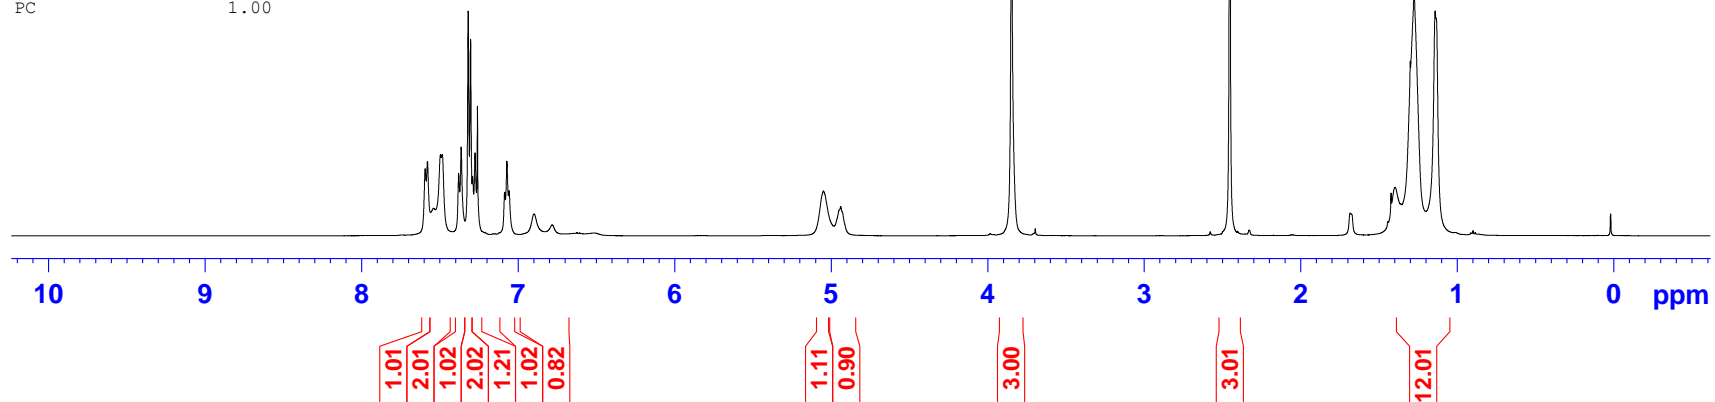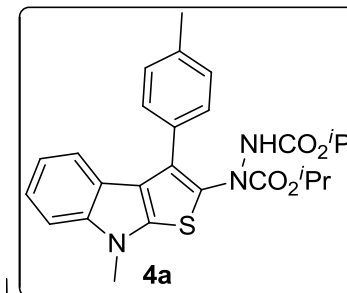

Figure S3. <sup>1</sup>H NMR Spectrum of **4a**

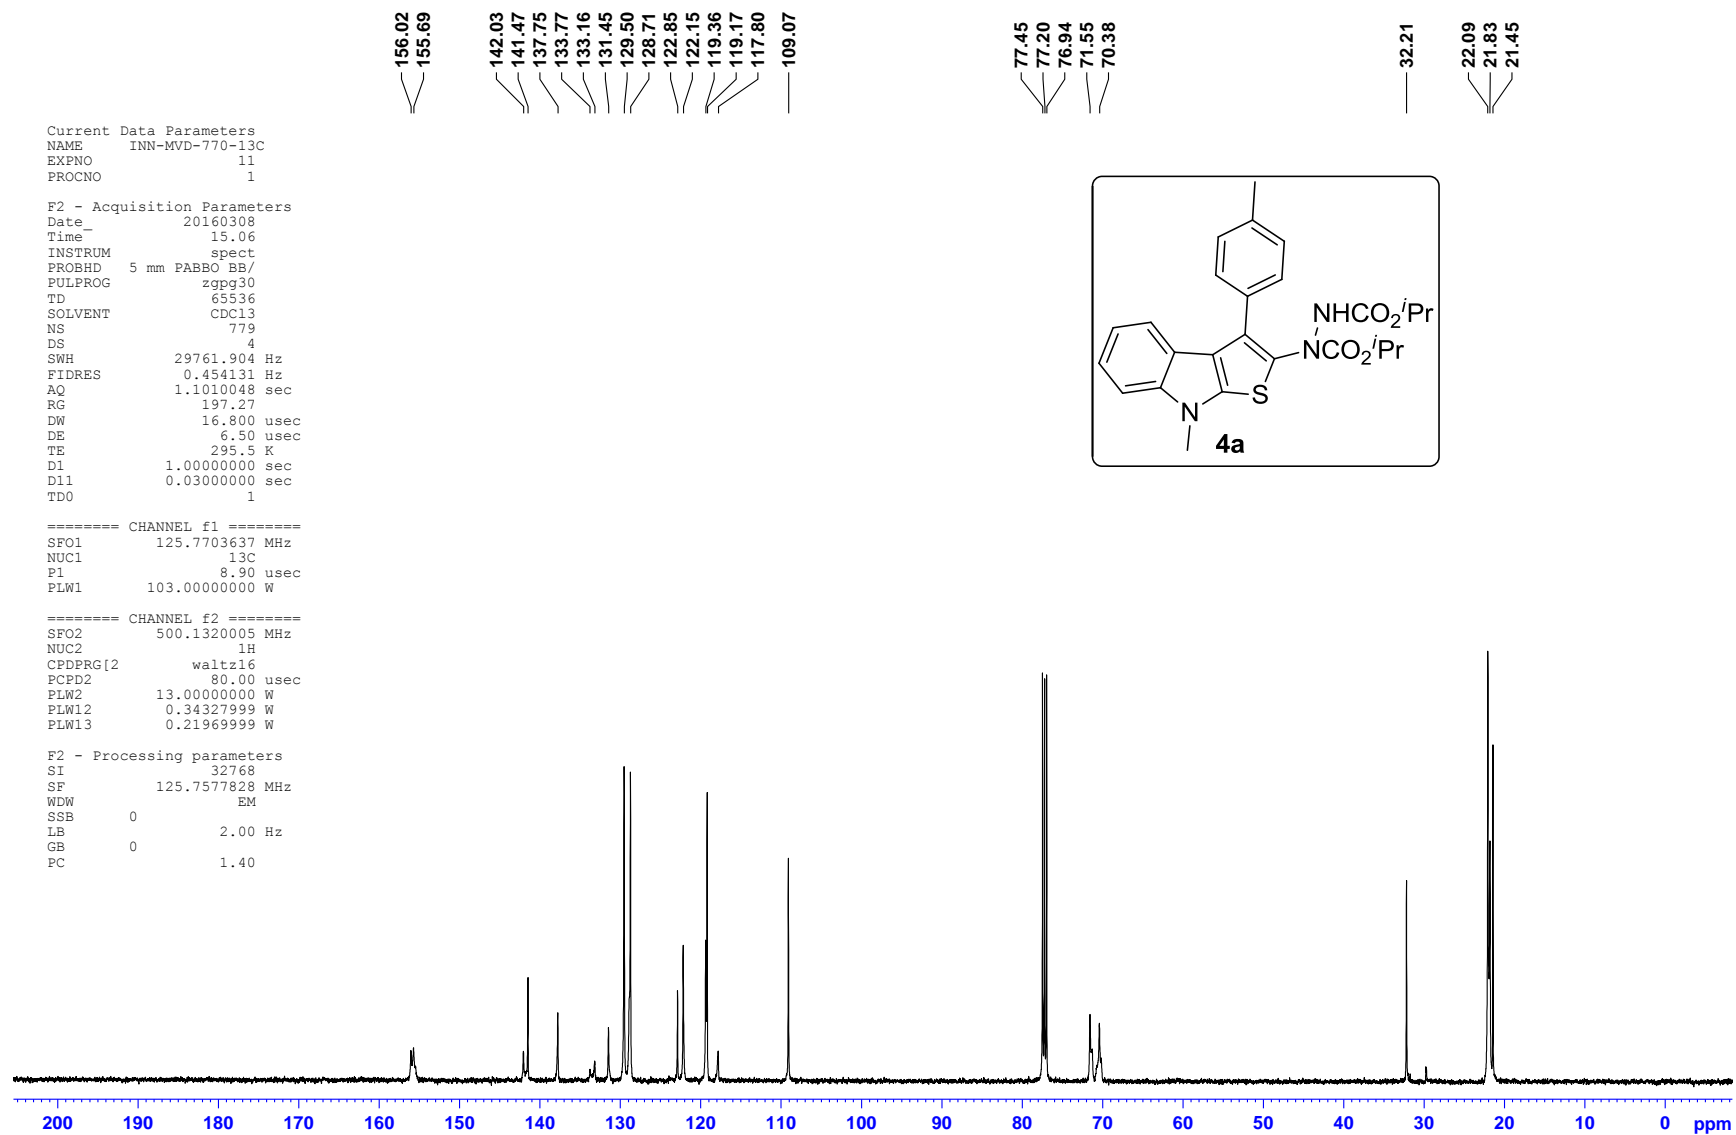

Figure S4. <sup>13</sup>C NMR Spectrum of 4a

Current Data Parameters  
NAME INN-MVD-800-1H  
EXPNO 7  
PROCNO 1

F2 - Acquisition Parameters  
Date\_ 20160408  
Time\_ 14.04  
INSTRUM spect  
PROBHD 5 mm PABBO BB/  
PULPROG zg30  
TD 65536  
SOLVENT CDCl3  
NS 12  
DS 2  
SWH 10000.000 Hz  
FIDRES 0.152588 Hz  
AQ 3.2767999 sec  
RG 13.43  
DW 50.000 usec  
DE 6.50 usec  
TE 298.0 K  
D1 1.0000000 sec  
TDO 1

==== CHANNEL f1 =====  
SFO1 500.1330885 MHz  
NUC1 1H  
P1 13.00 usec  
PLW1 13.00000000 W

F2 - Processing parameters  
SI 65536  
SF 500.1300117 MHz  
WDW EM  
SSB 0  
LB 0.30 Hz  
GB 0  
PC 1.00

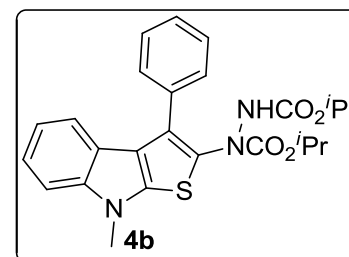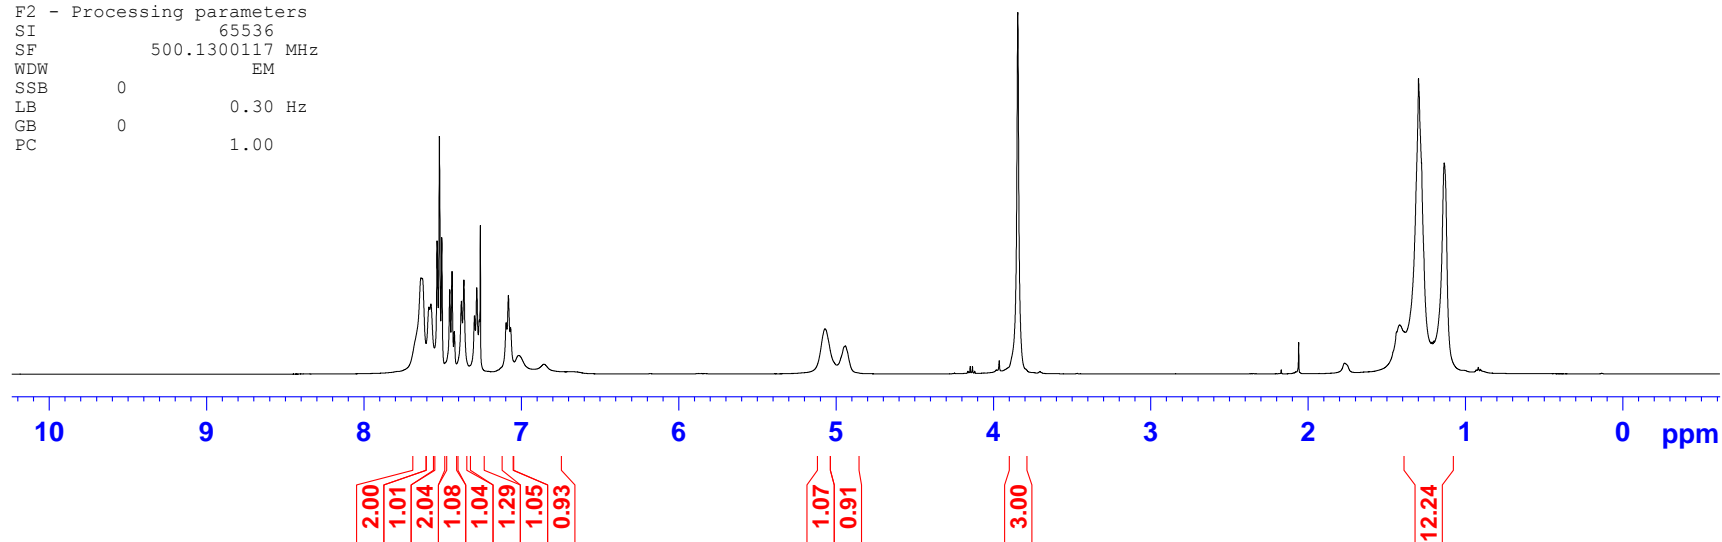

Figure S5.  $^1\text{H}$  NMR Spectrum of **4b**

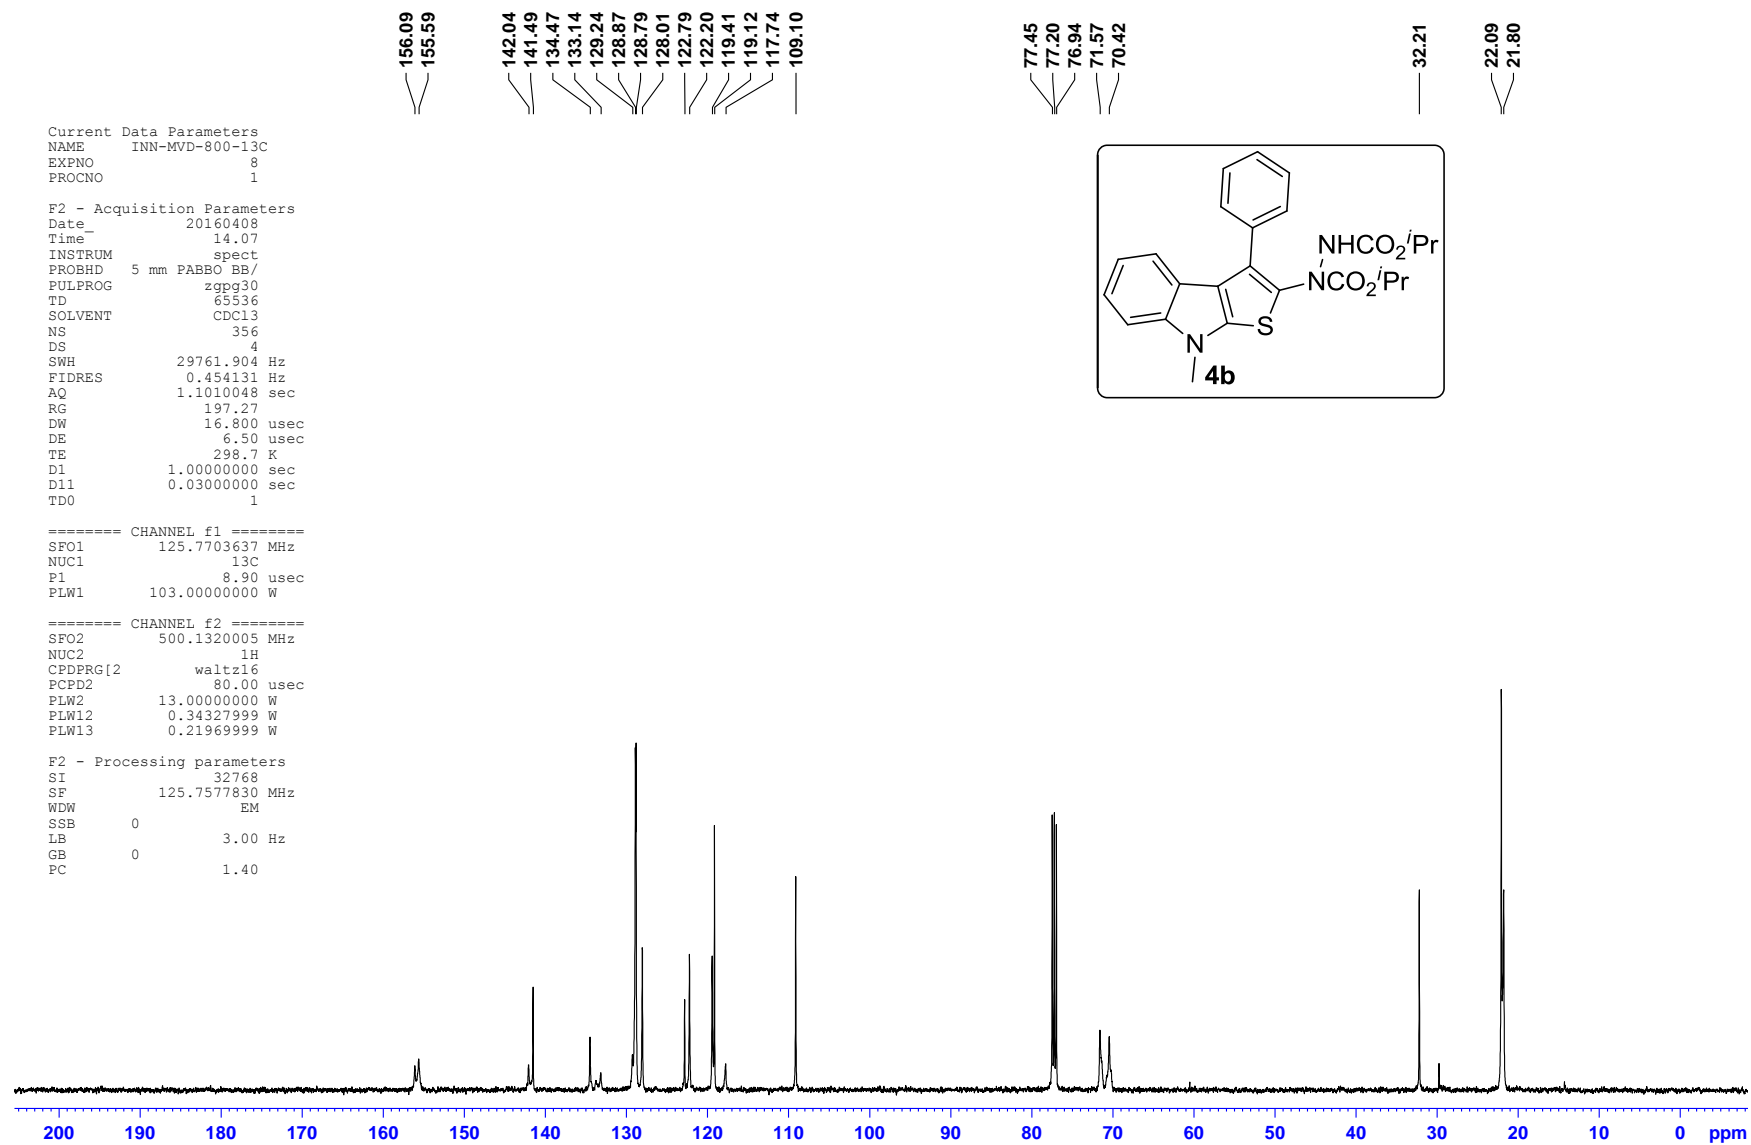

Figure S6. <sup>13</sup>C NMR Spectrum of **4b**



Current Data Parameters  
NAME INN-MVD-789-1H  
EXPNO 7  
PROCNO 1

F2 - Acquisition Parameters  
Date\_ 20160414  
Time\_ 19.24  
INSTRUM spect  
PROBHD 5 mm PABBO BB/  
PULPROG zg30  
TD 65536  
SOLVENT CDC13  
NS 24  
DS 2  
SWH 10000.000 Hz  
FIDRES 0.152588 Hz  
AQ 3.2767999 sec  
RG 69.35  
DW 50.000 usec  
DE 6.50 usec  
TE 299.9 K  
D1 1.00000000 sec  
TD0 1

==== CHANNEL f1 =====  
SFO1 500.1330885 MHz  
NUC1 1H  
P1 13.00 usec  
PLW1 13.00000000 W

F2 - Processing parameters  
SI 65536  
SF 500.1300125 MHz  
WDW EM  
SSB 0  
LB 0.30 Hz  
GB 0  
PC 1.00

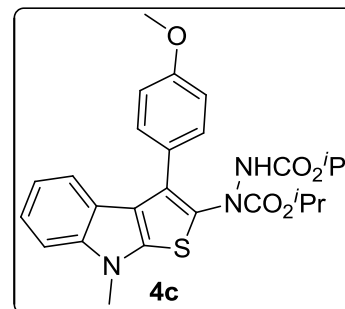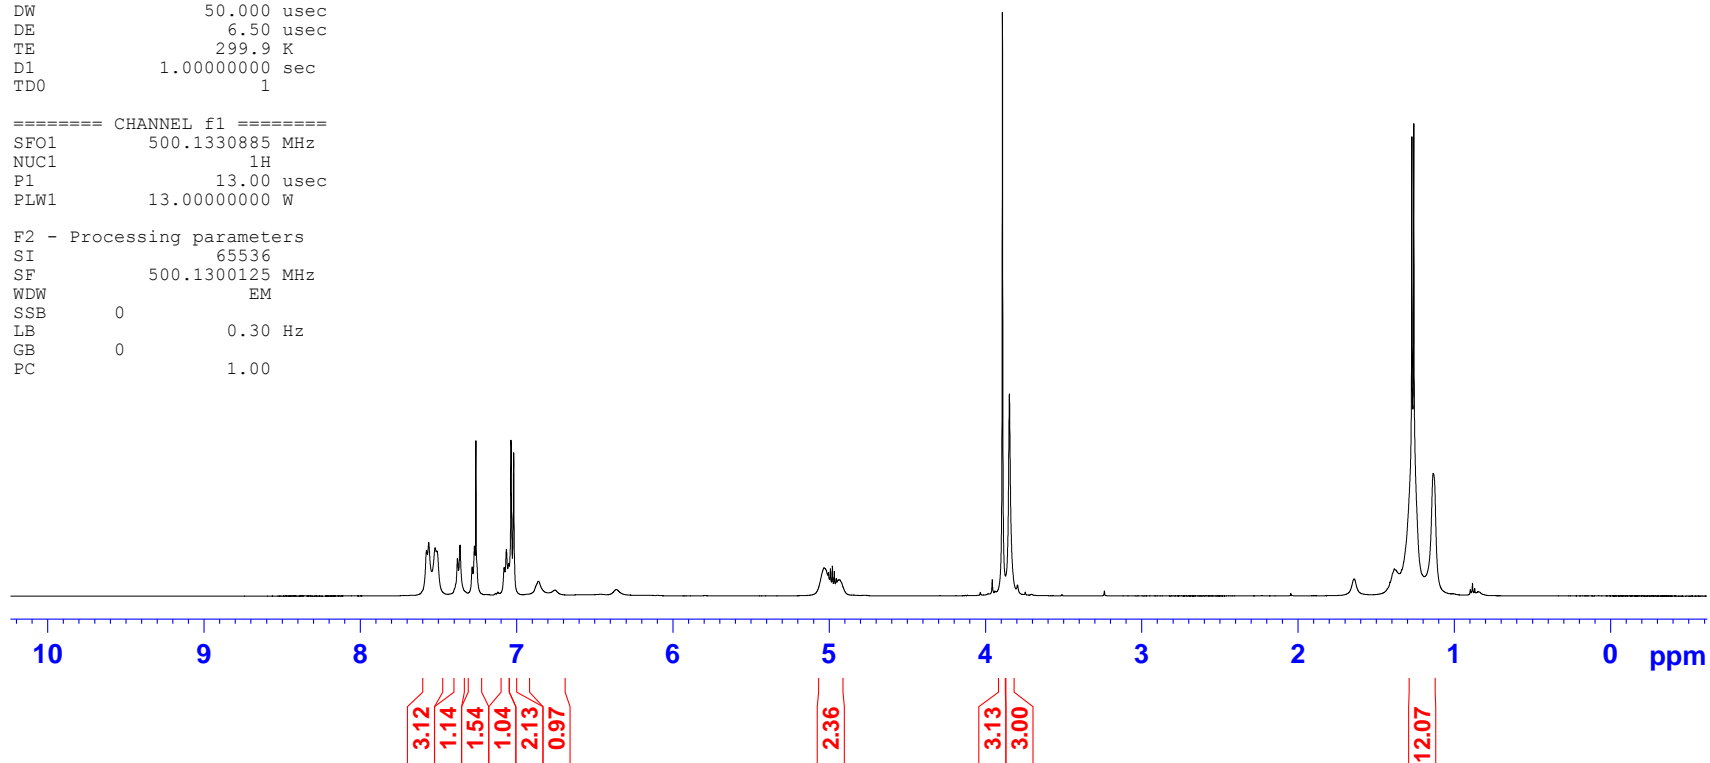

Figure S7. <sup>1</sup>H NMR Spectrum of 4c

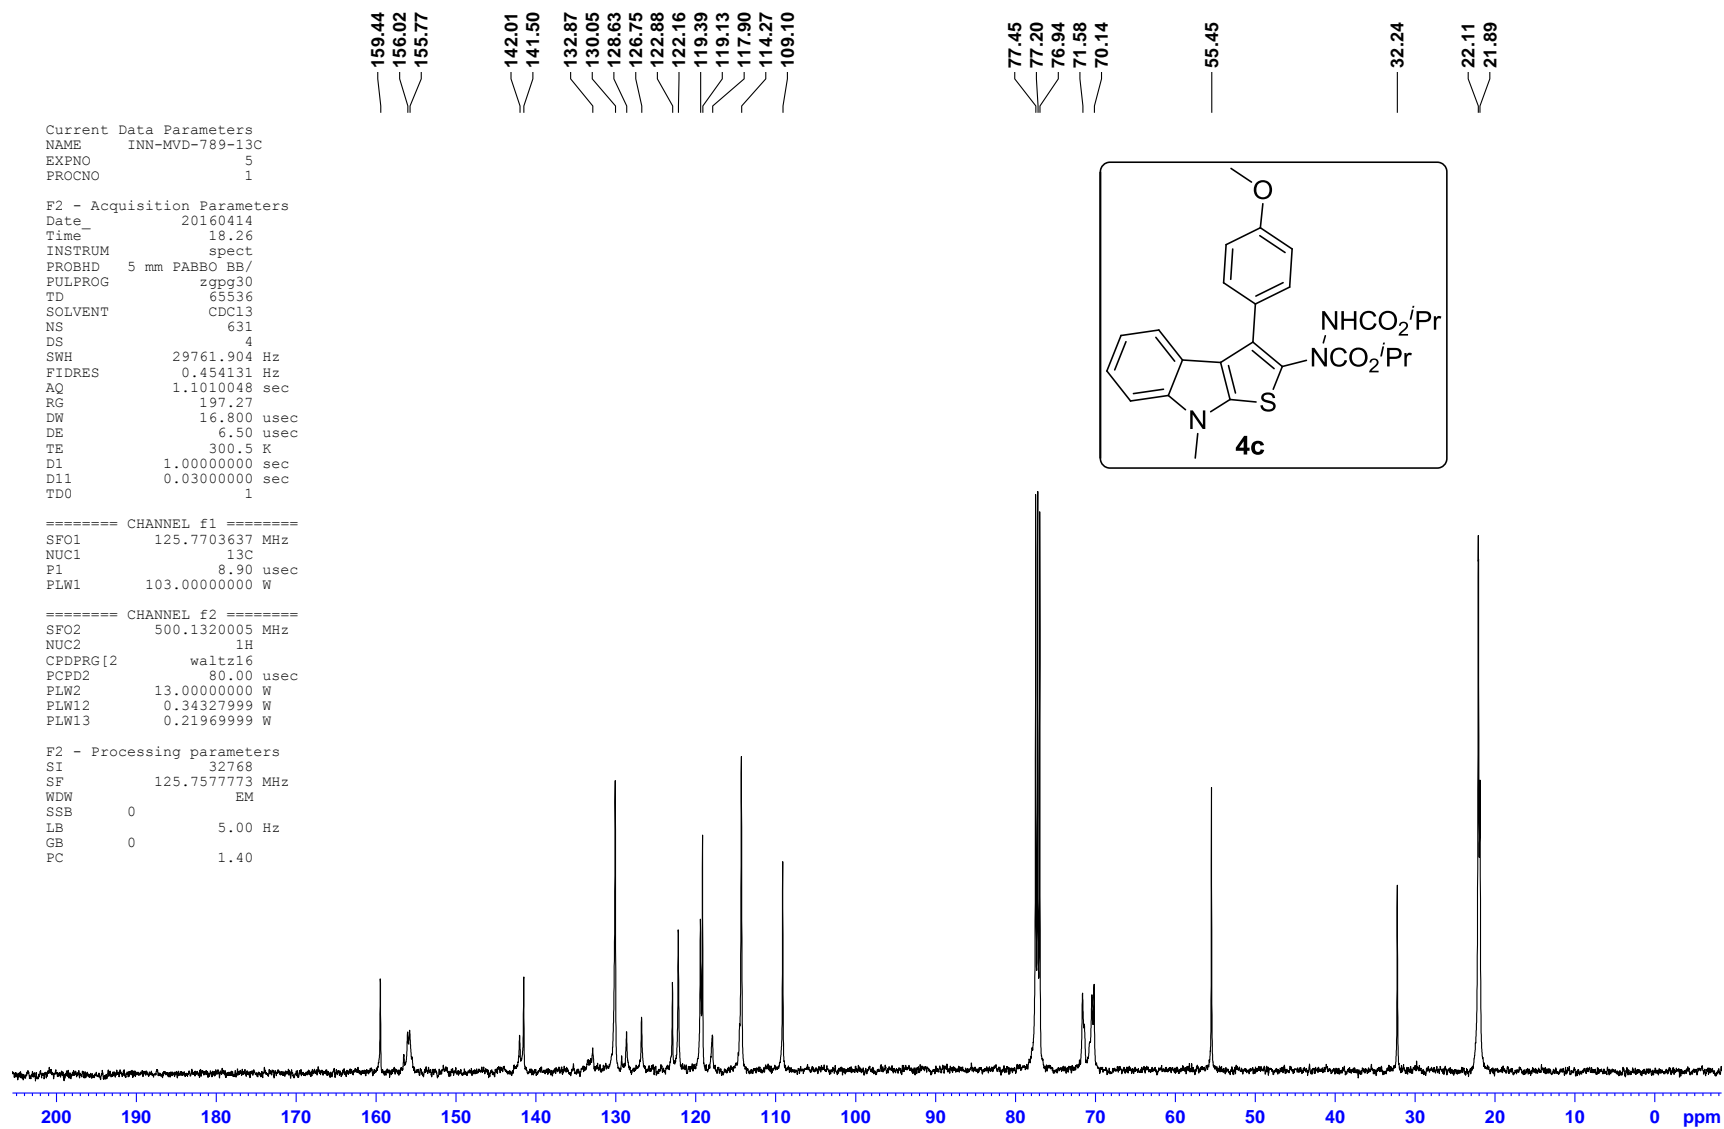

Figure S8.  $^{13}\text{C}$  NMR Spectrum of **4c**

Current Data Parameters  
NAME INN-MVD-791-1H  
EXPNO 3  
PROCNO 1

F2 - Acquisition Parameters  
Date\_ 20160322  
Time\_ 12.43  
INSTRUM spect  
PROBHD 5 mm PABBO BB/  
PULPROG zg30  
TD 65536  
SOLVENT CDCl3  
NS 1  
DS 0  
SWH 10000.000 Hz  
FIDRES 0.152588 Hz  
AQ 3.2767999 sec  
RG 12.52  
DW 50.000 usec  
DE 6.50 usec  
TE 294.8 K  
D1 1.00000000 sec  
TD0 1

==== CHANNEL f1 =====  
SFO1 500.1330885 MHz  
NUC1 1H  
P1 13.00 usec  
PLW1 13.00000000 W

F2 - Processing parameters  
SI 65536  
SF 500.1300107 MHz  
WDW EM  
SSB 0  
LB 0.30 Hz  
GB 0  
PC 1.00

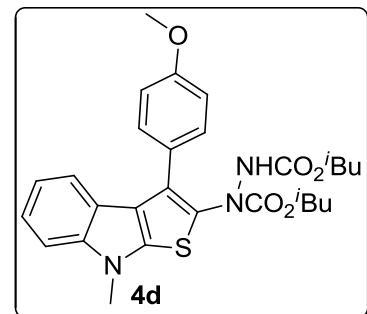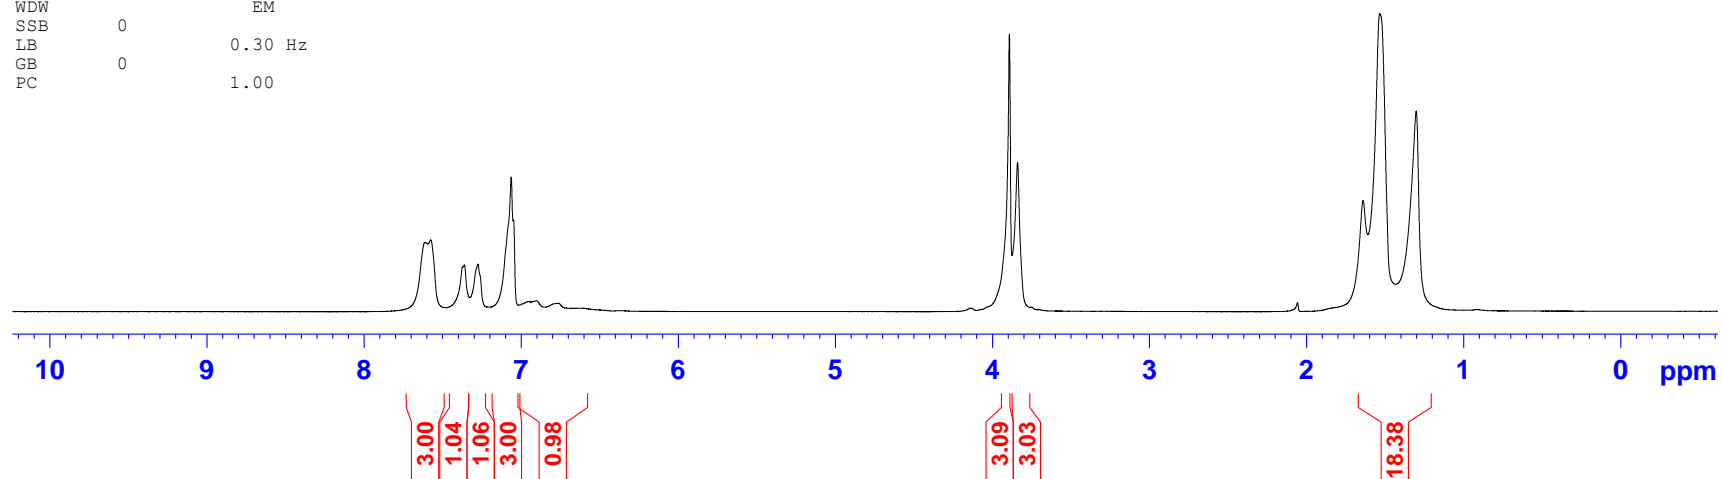

Figure S9. <sup>1</sup>H NMR Spectrum of 4d

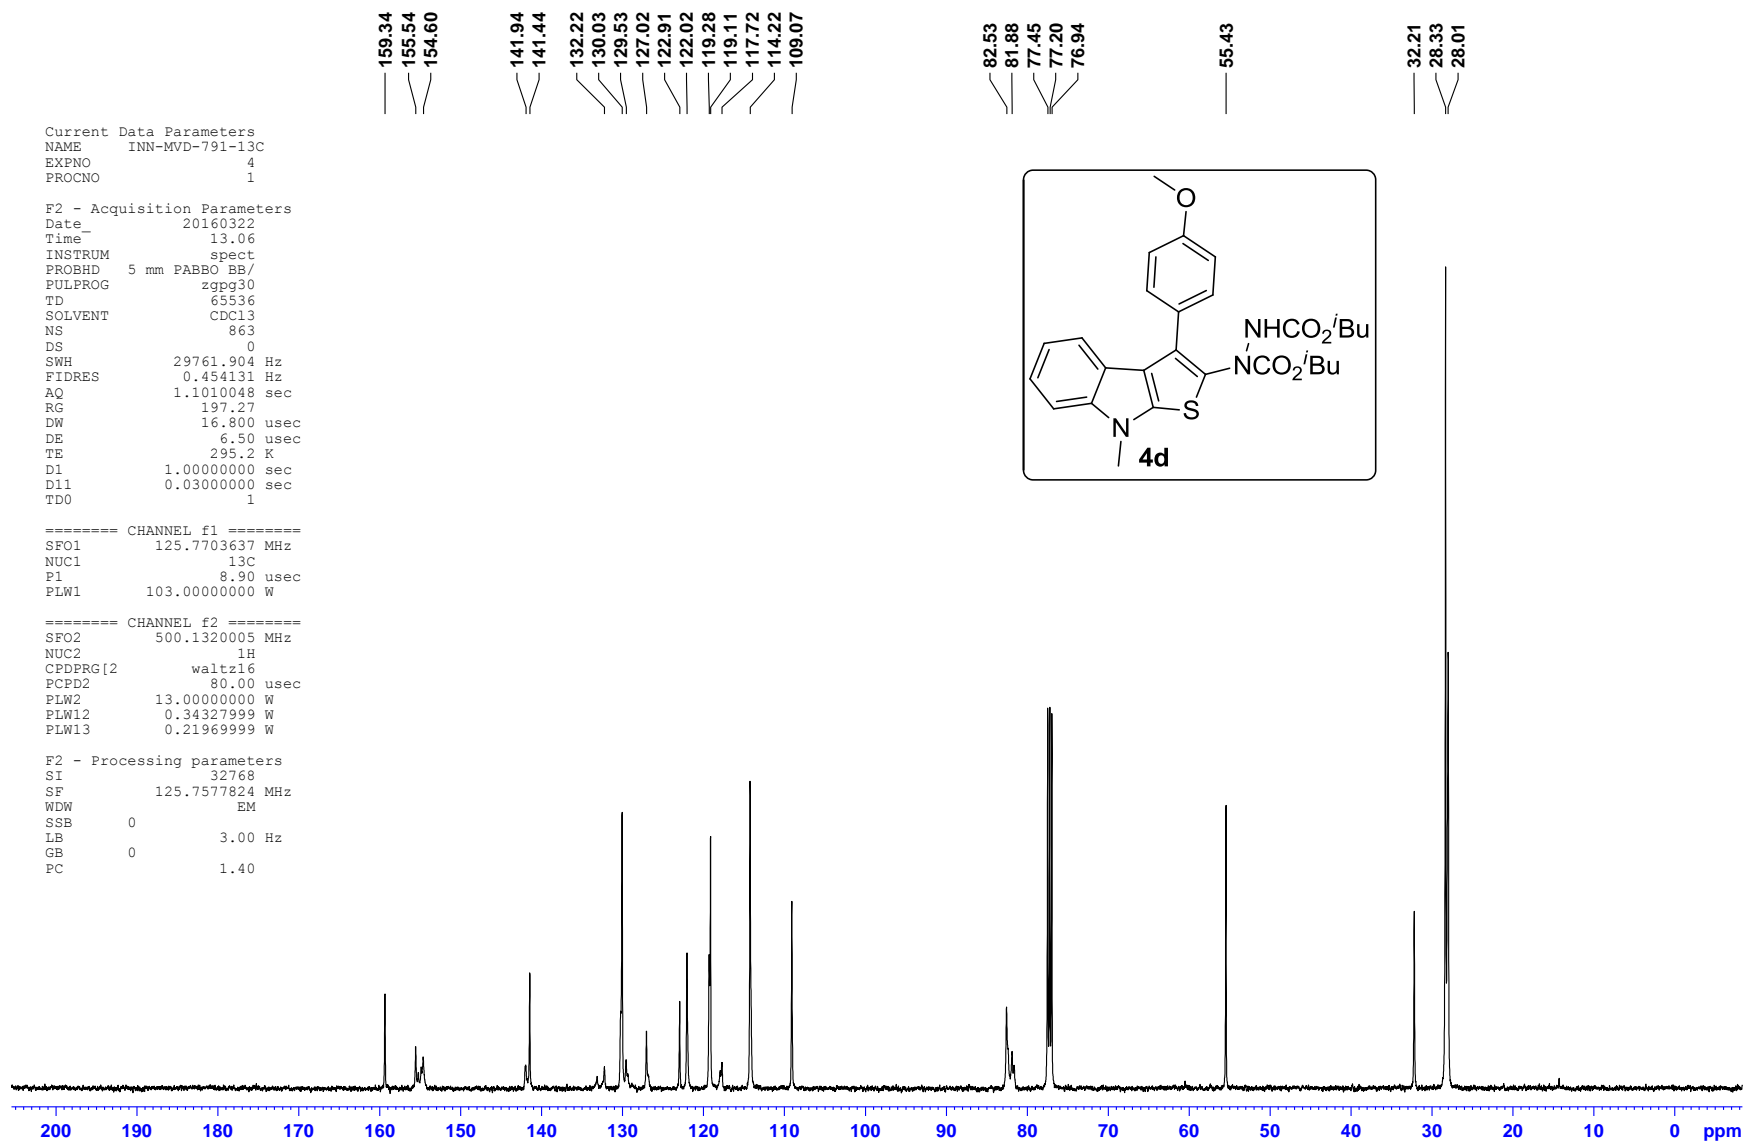

Figure S10.  $^{13}\text{C}$  NMR Spectrum of **4d**

Current Data Parameters  
NAME INN-MVD-801-1H  
EXPNO 5  
PROCNO 1

F2 - Acquisition Parameters  
Date\_ 20160408  
Time\_ 13.09  
INSTRUM spect  
PROBHD 5 mm PABBO BB/  
PULPROG zg30  
TD 65536  
SOLVENT CDC13  
NS 12  
DS 2  
SWH 10000.000 Hz  
FIDRES 0.152588 Hz  
AQ 3.2767999 sec  
RG 53.37  
DW 50.000 usec  
DE 6.50 usec  
TE 297.9 K  
D1 1.00000000 sec  
TD0 1

==== CHANNEL f1 =====  
SFO1 500.1330885 MHz  
NUC1 1H  
P1 13.00 usec  
PLW1 13.00000000 W

F2 - Processing parameters  
SI 65536  
SF 500.1300122 MHz  
WDW EM  
SSB 0  
LB 0.30 Hz  
GB 0  
PC 1.00

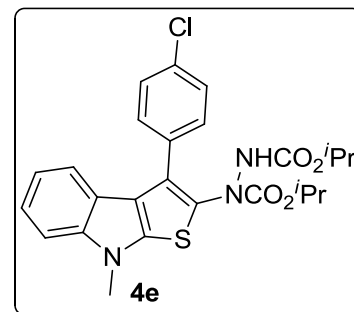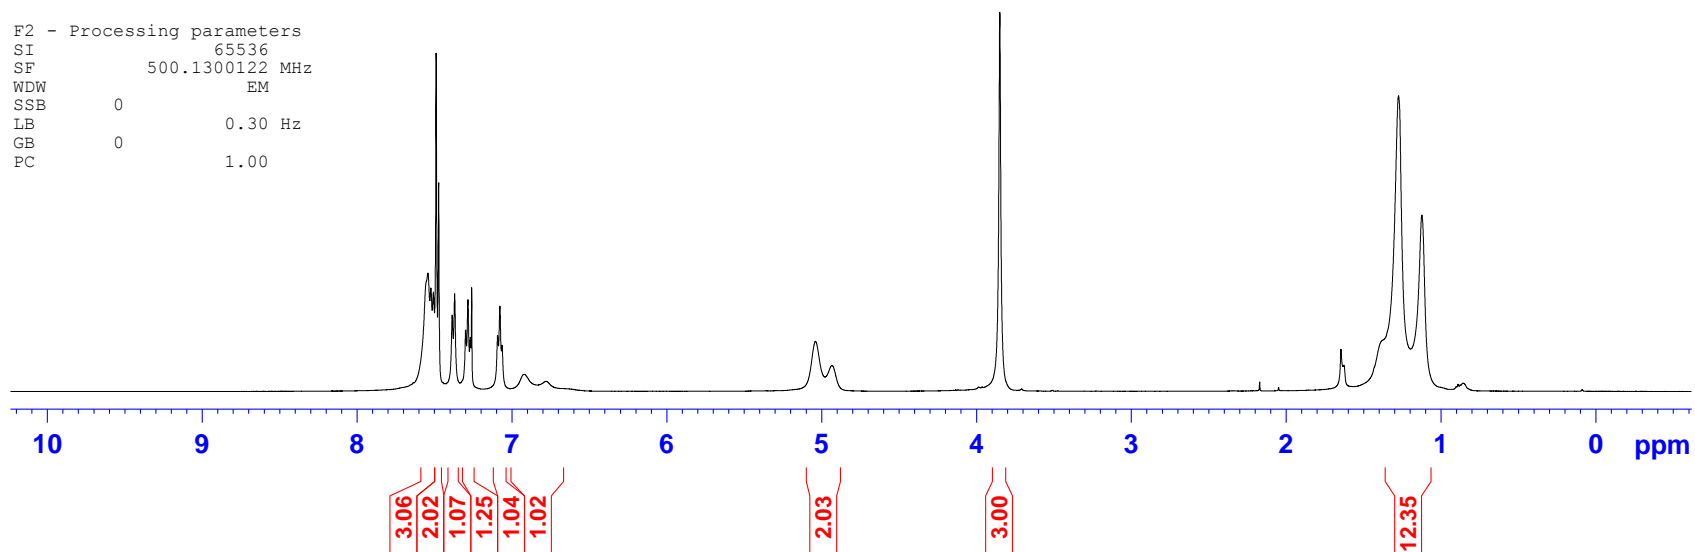

Figure S11. <sup>1</sup>H NMR Spectrum of **4e**

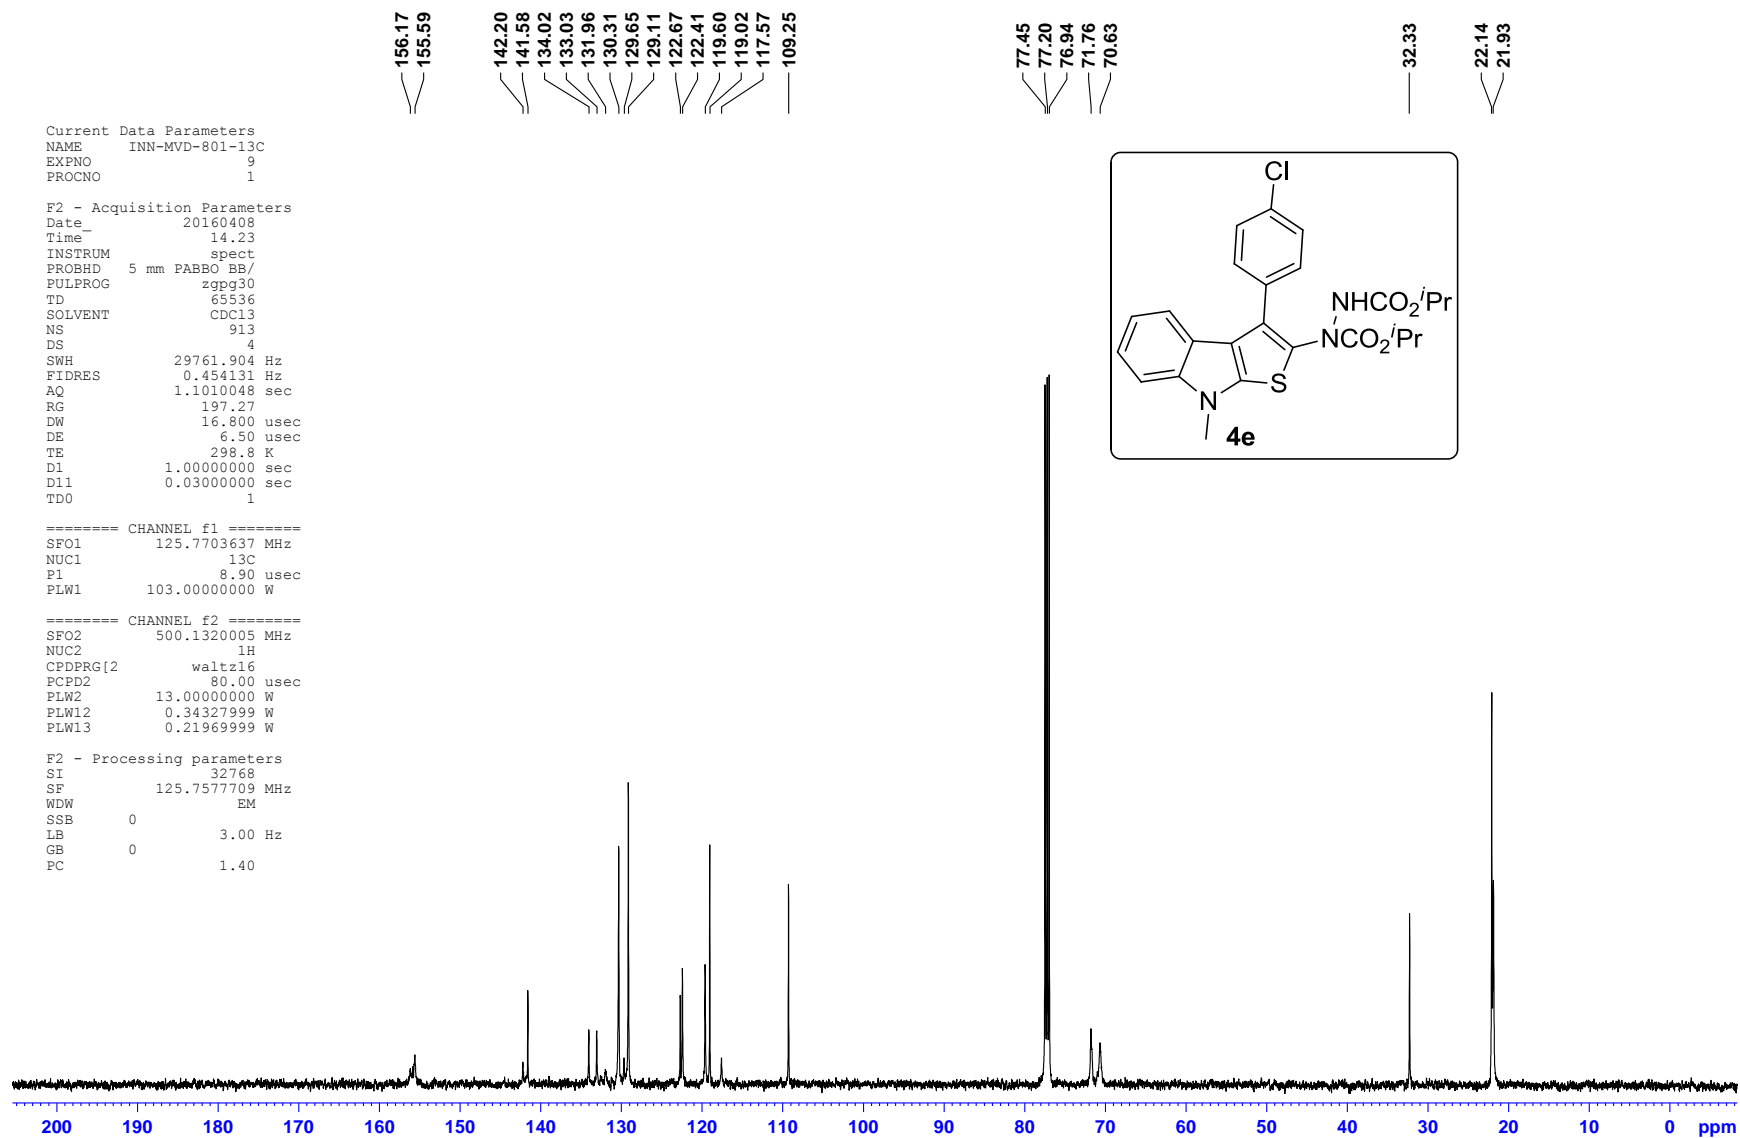

Figure S12.  $^{13}\text{C}$  NMR Spectrum of **4e**

Current Data Parameters  
NAME INN-MVD-794-1H  
EXPNO 5  
PROCNO 1

F2 - Acquisition Parameters  
Date\_ 20160322  
Time\_ 13.20  
INSTRUM spect  
PROBHD 5 mm PABBO BB/  
PULPROG zg30  
TD 65536  
SOLVENT CDCl3  
NS 25  
DS 2  
SWH 10000.000 Hz  
FIDRES 0.152588 Hz  
AQ 3.2767999 sec  
RG 30.72  
DW 50.000 usec  
DE 6.50 usec  
TE 294.3 K  
D1 1.00000000 sec  
TD0 1

==== CHANNEL f1 =====  
SF01 500.1330885 MHz  
NUC1 1H  
P1 13.00 usec  
PLW1 13.00000000 W

F2 - Processing parameters  
SI 65536  
SF 500.1300119 MHz  
WDW EM  
SSB 0  
LB 0.30 Hz  
GB 0  
PC 1.00

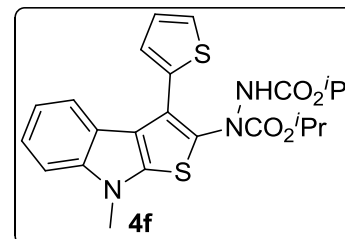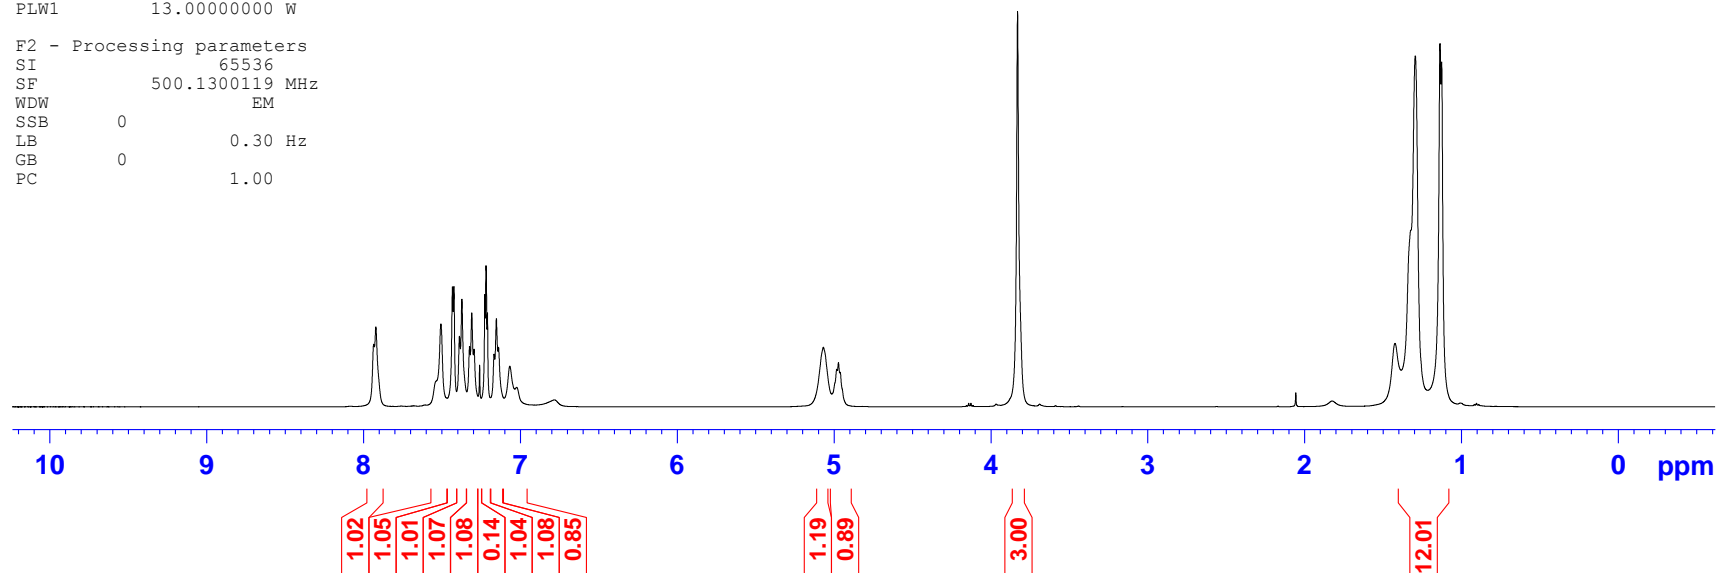

Figure S13. <sup>1</sup>H NMR Spectrum of 4f

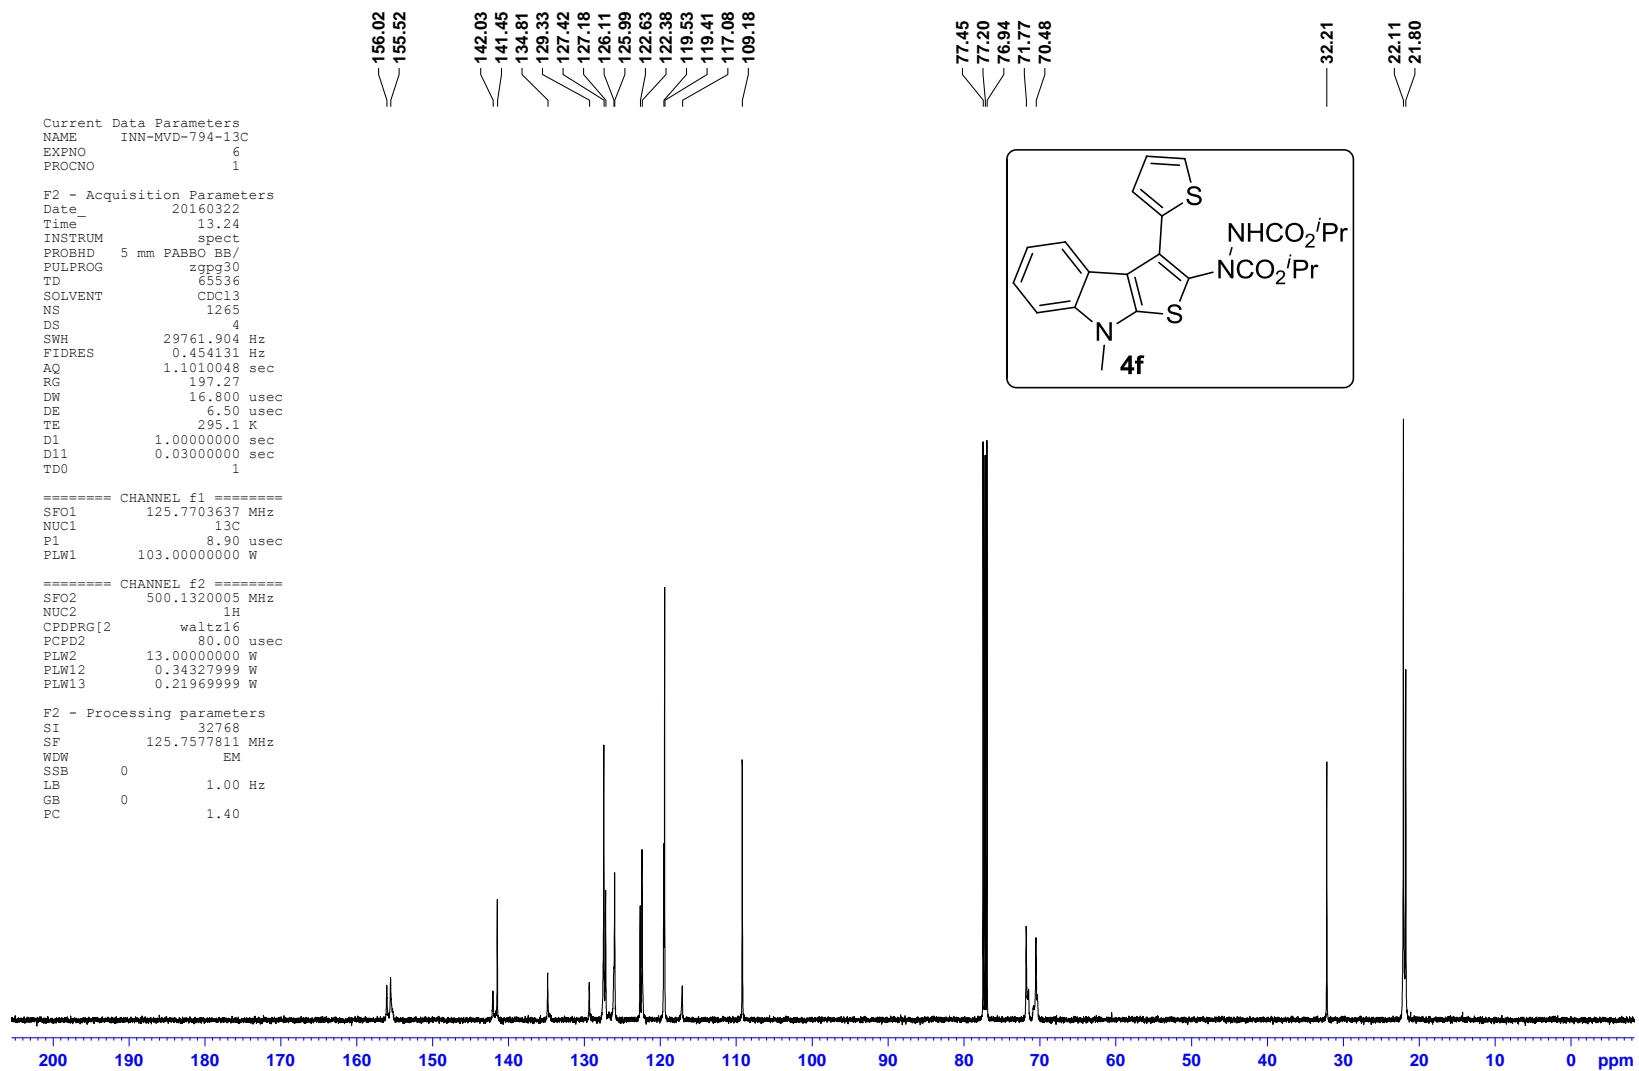

Figure S14. <sup>13</sup>C NMR Spectrum of 4f



Current Data Parameters  
NAME INN-MVD-802-1H  
EXPNO 5  
PROCNO 1

F2 - Acquisition Parameters  
Date\_ 20160414  
Time\_ 10.30  
INSTRUM spect  
PROBHD 5 mm SEI 1H/D-  
PULPROG zg30  
TD 54274  
SOLVENT CDCl3  
NS 60  
DS 0  
SWH 8223.685 Hz  
FIDRES 0.151522 Hz  
AQ 3.2998593 sec  
RG 64  
DW 60.800 usec  
DE 6.50 usec  
TE 294.6 K  
D1 1.00000000 sec  
TD0 1

==== CHANNEL f1 =====  
NUC1 1H  
P1 6.75 usec  
PL1 -3.00 dB  
PL1W 16.73965454 W  
SFO1 400.1324710 MHz

F2 - Processing parameters  
SI 32768  
SF 400.1300095 MHz  
WDW EM  
SSB 0  
LB 0.30 Hz  
GB 0  
PC 1.00

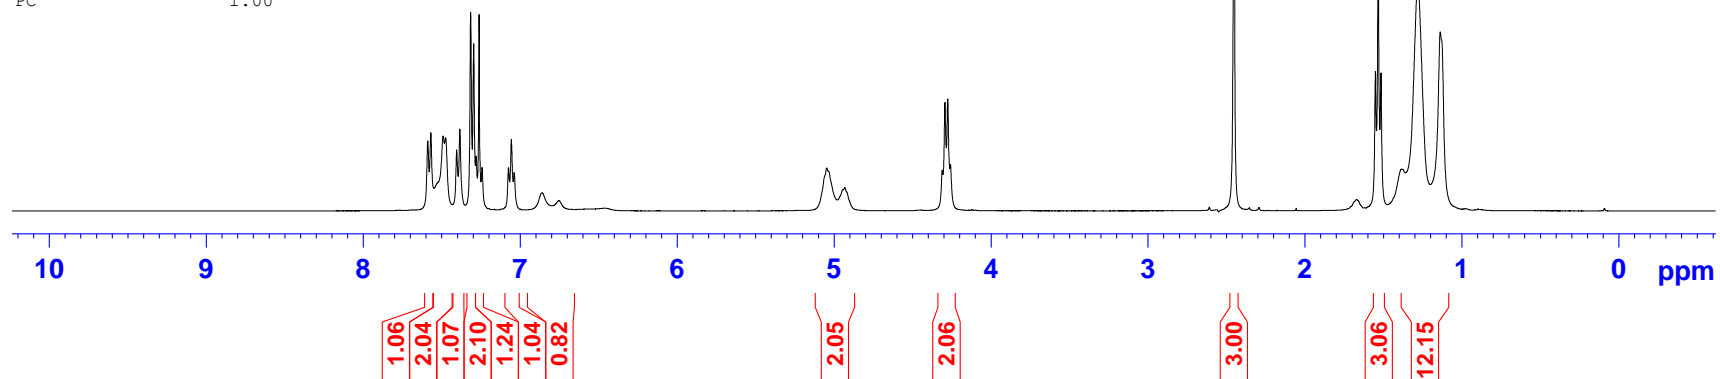

Figure S15. <sup>1</sup>H NMR Spectrum of 4g

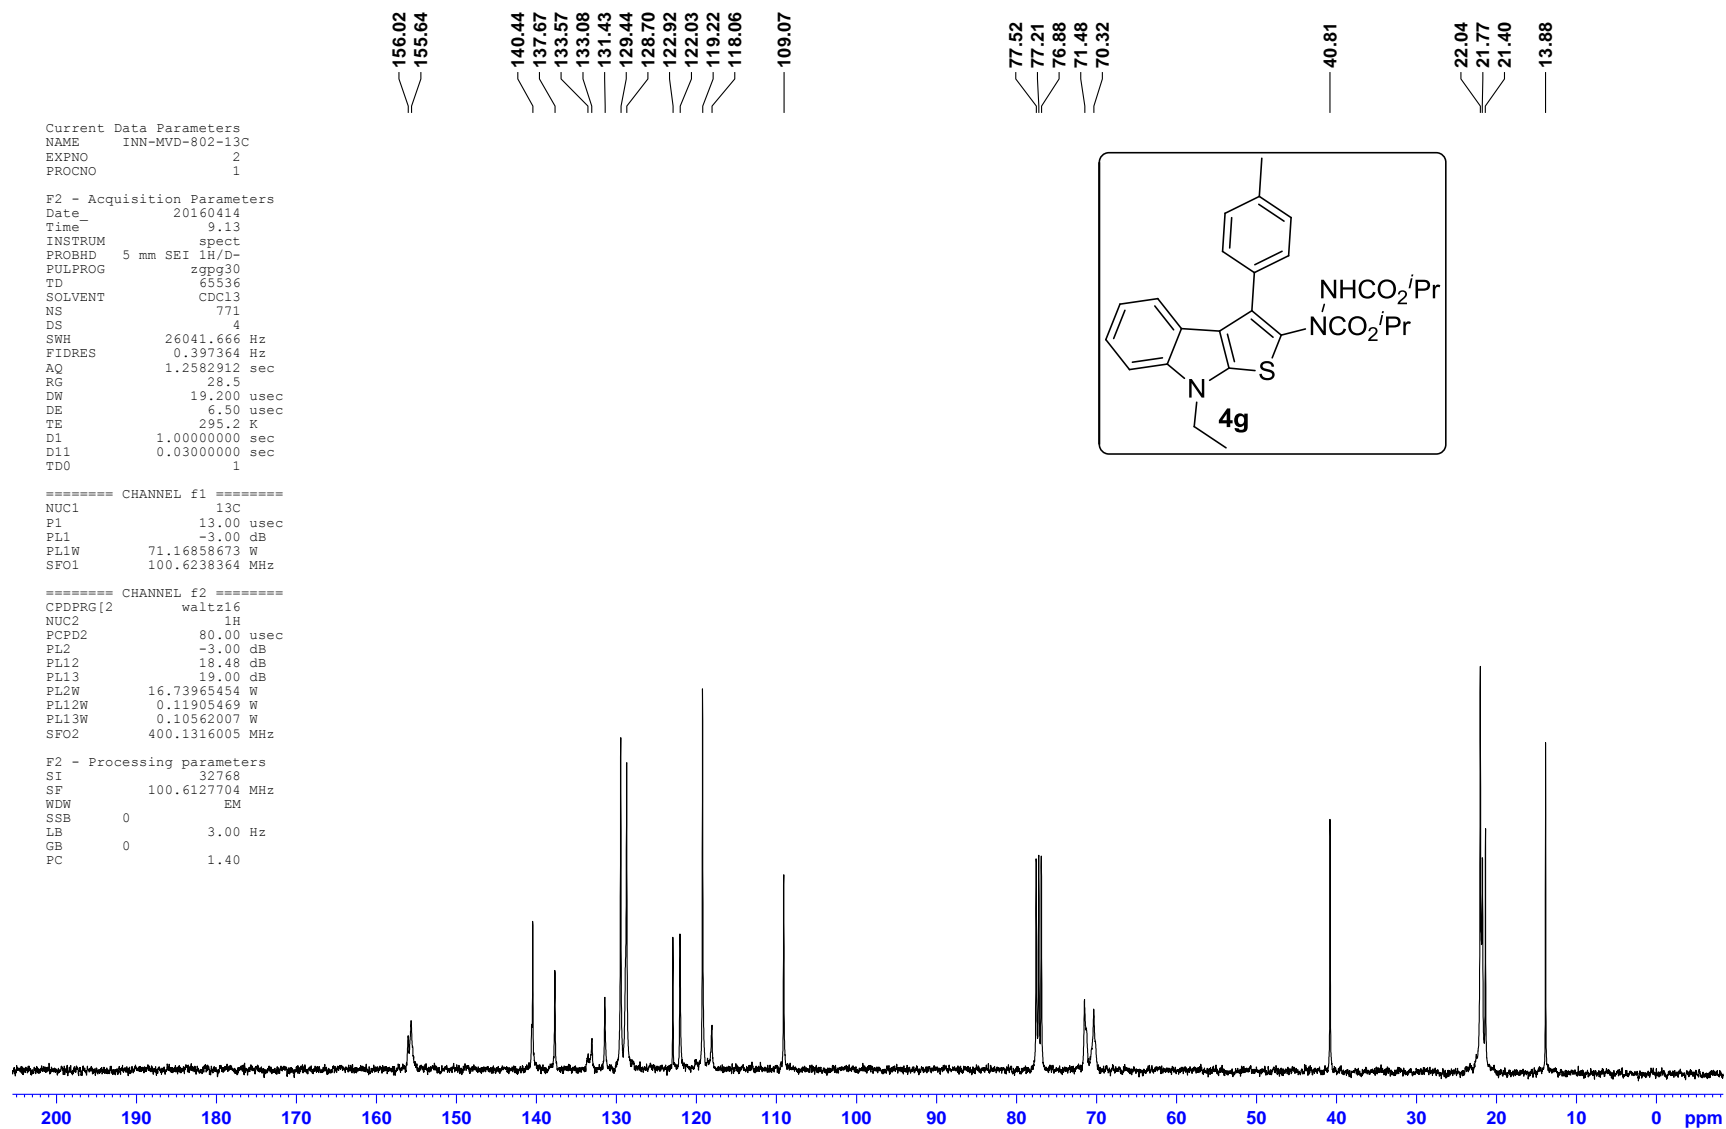

Figure S16. <sup>13</sup>C NMR Spectrum of 4g

Current Data Parameters  
NAME INN-MVD-796-1H  
EXPNO 5  
PROCNO 1

F2 - Acquisition Parameters  
Date\_ 20160403  
Time\_ 11.38  
INSTRUM spect  
PROBHD 5 mm PABBO BB/  
PULPROG zg30  
TD 65536  
SOLVENT CDC13  
NS 19  
DS 2  
SWH 10000.000 Hz  
FIDRES 0.152588 Hz  
AQ 3.2767999 sec  
RG 15.73  
DW 50.000 usec  
DE 6.50 usec  
TE 294.8 K  
D1 1.00000000 sec  
TD0 1

==== CHANNEL f1 =====  
SFO1 500.1330885 MHz  
NUC1 1H  
P1 13.00 usec  
PLW1 13.00000000 W

F2 - Processing parameters  
SI 65536  
SF 500.1300116 MHz  
WDW EM  
SSB 0  
LB 0.30 Hz  
GB 0  
PC 1.00

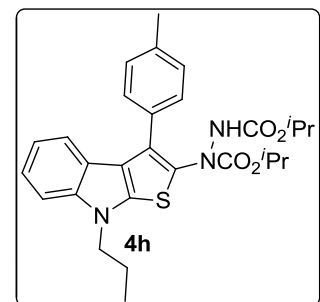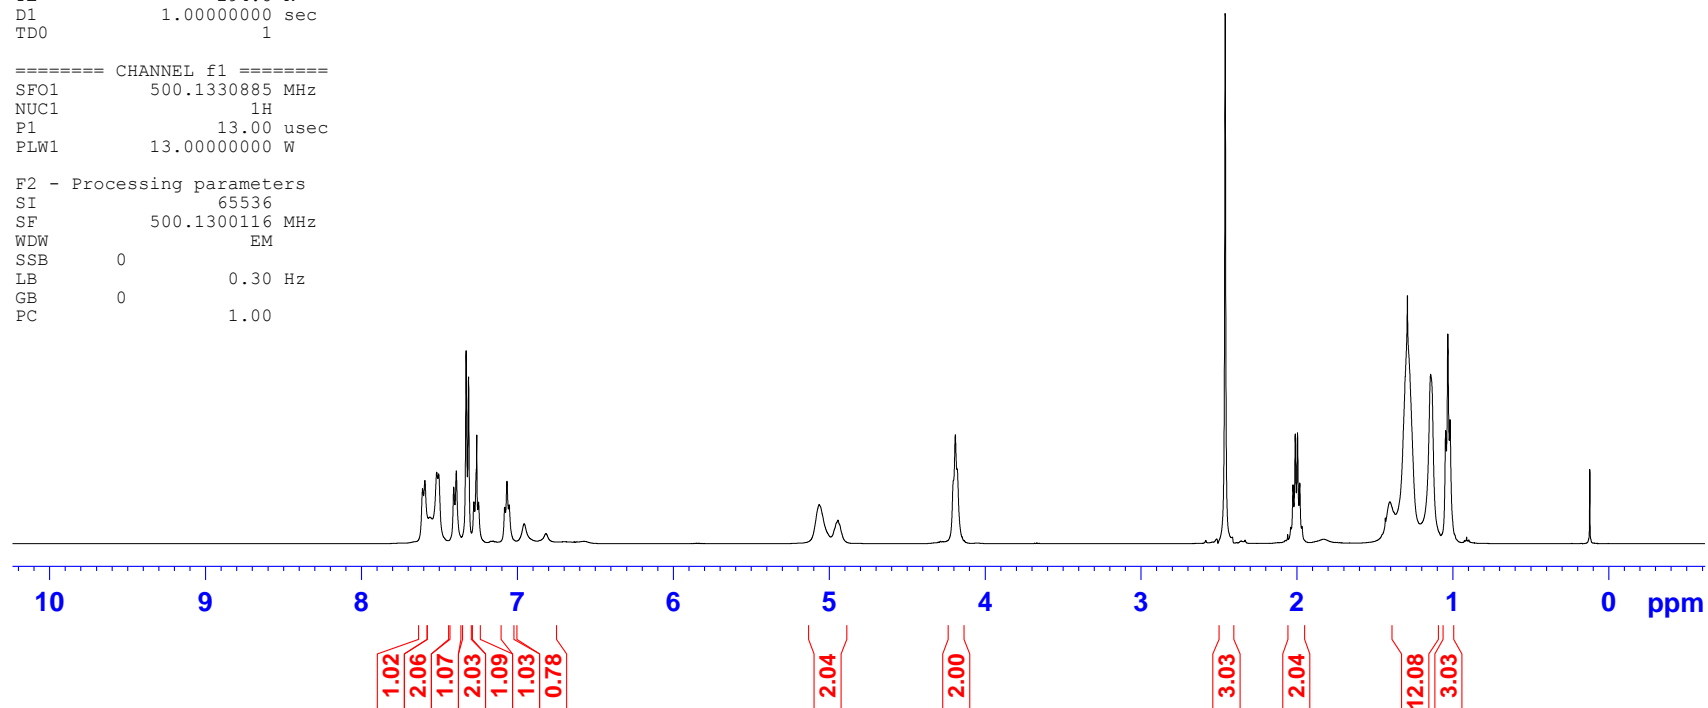

Figure S17. <sup>1</sup>H NMR Spectrum of 4h

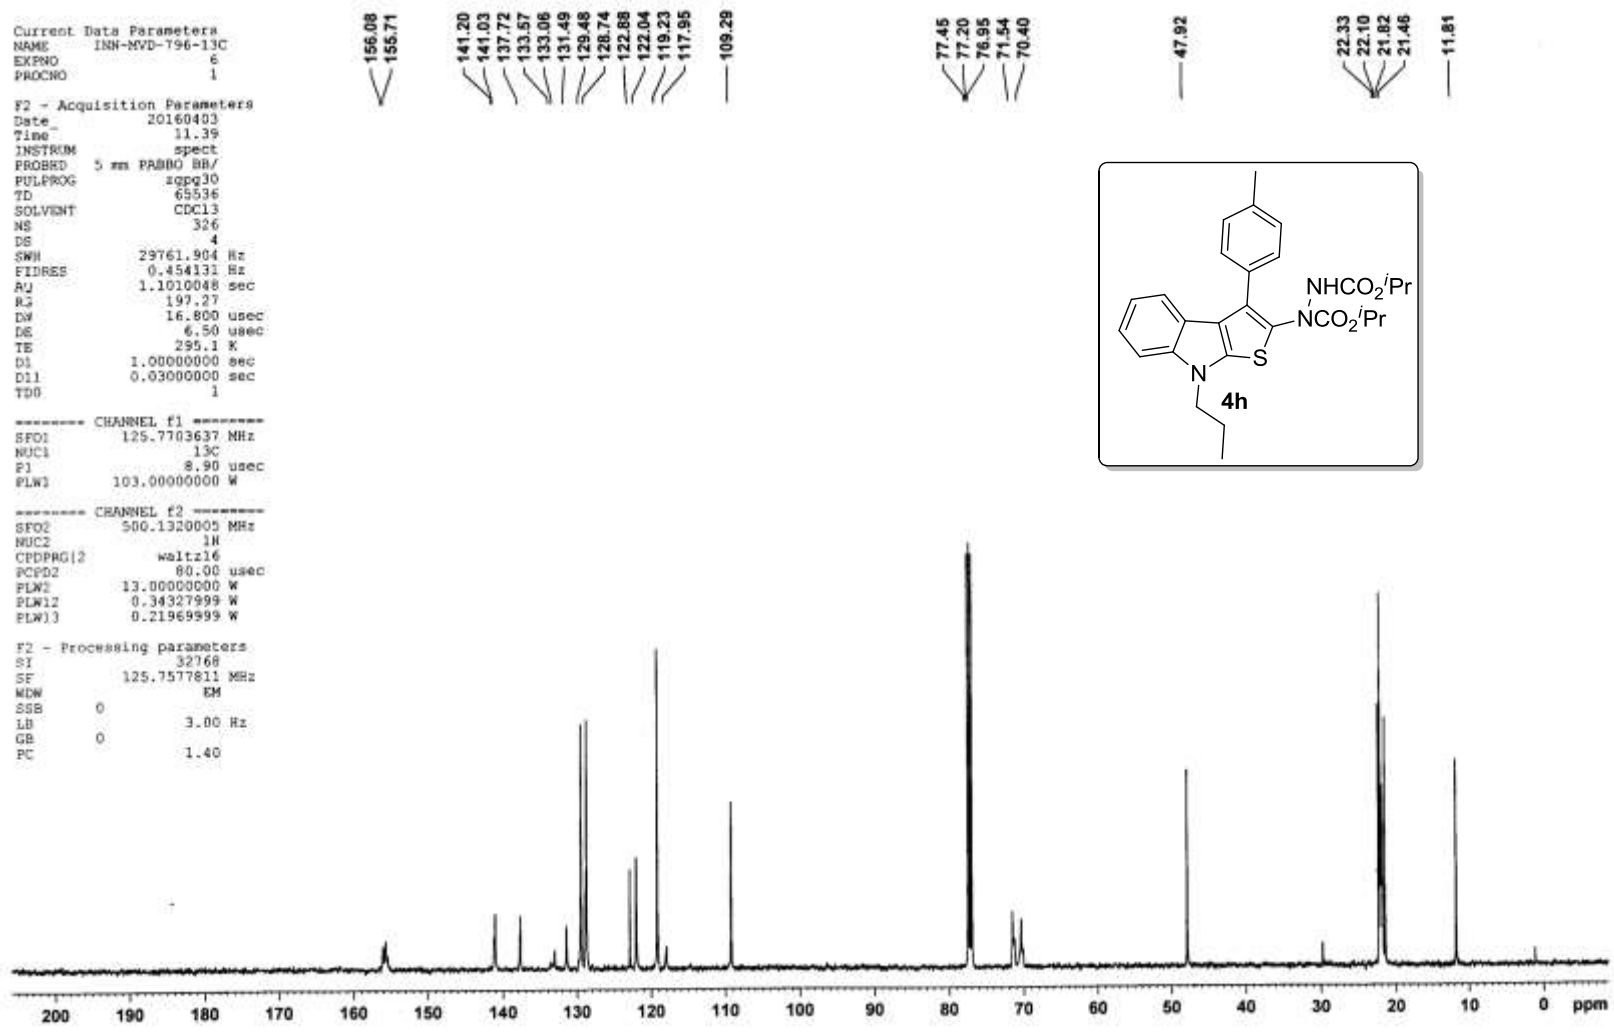

Figure S18. <sup>13</sup>C NMR Spectrum of 4h

Current Data Parameters  
NAME INN-MVD-803-1H  
EXPNO 1  
PROCNO 1

F2 - Acquisition Parameters  
Date\_ 20160417  
Time\_ 8.39  
INSTRUM spect  
PROBHD 5 mm SEI 1H/D-  
PULPROG zg30  
TD 54274  
SOLVENT CDCl3  
NS 18  
DS 0  
SWH 8223.685 Hz  
FIDRES 0.151522 Hz  
AQ 3.2998593 sec  
RG 12.7  
DW 60.800 usec  
DE 6.50 usec  
TE 293.9 K  
D1 1.00000000 sec  
TD0 1

==== CHANNEL f1 =====  
NUC1 1H  
P1 14.75 usec  
PL1 -1.00 dB  
PL1W 10.56200695 W  
SFO1 400.1324710 MHz

F2 - Processing parameters  
SI 32768  
SF 400.1300103 MHz  
WDW EM  
SSB 0  
LB 0.30 Hz  
GB 0  
PC 1.00

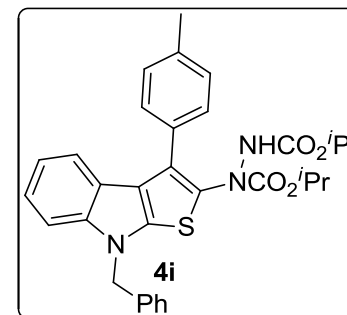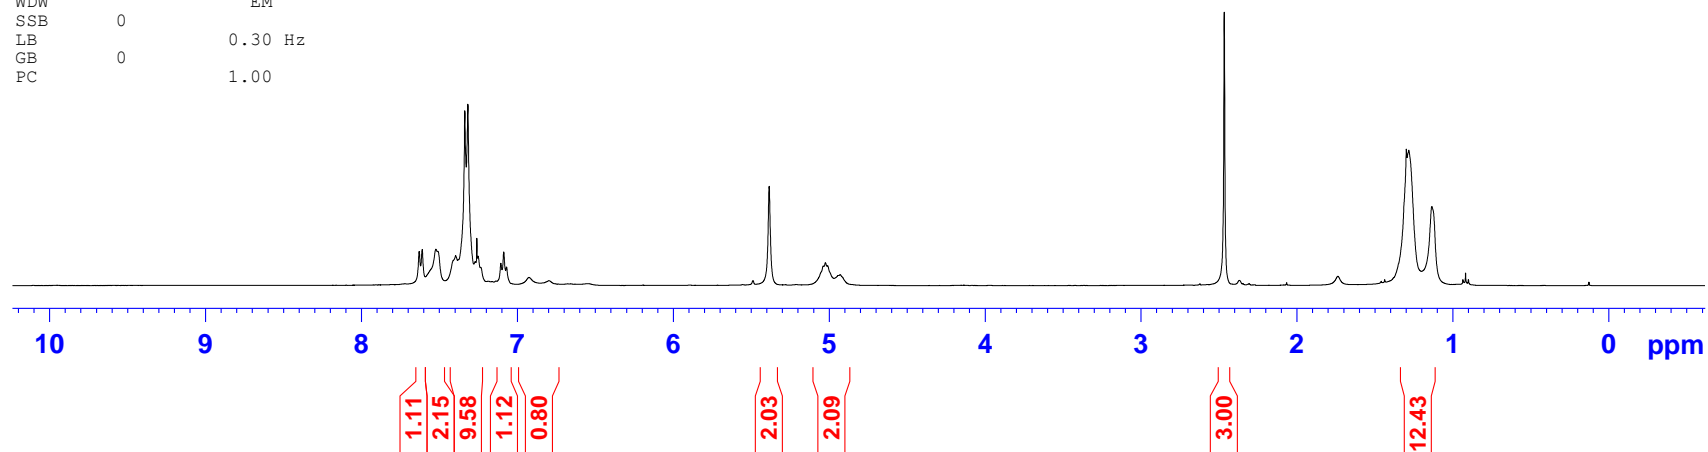

Figure S19. <sup>1</sup>H NMR Spectrum of 4i

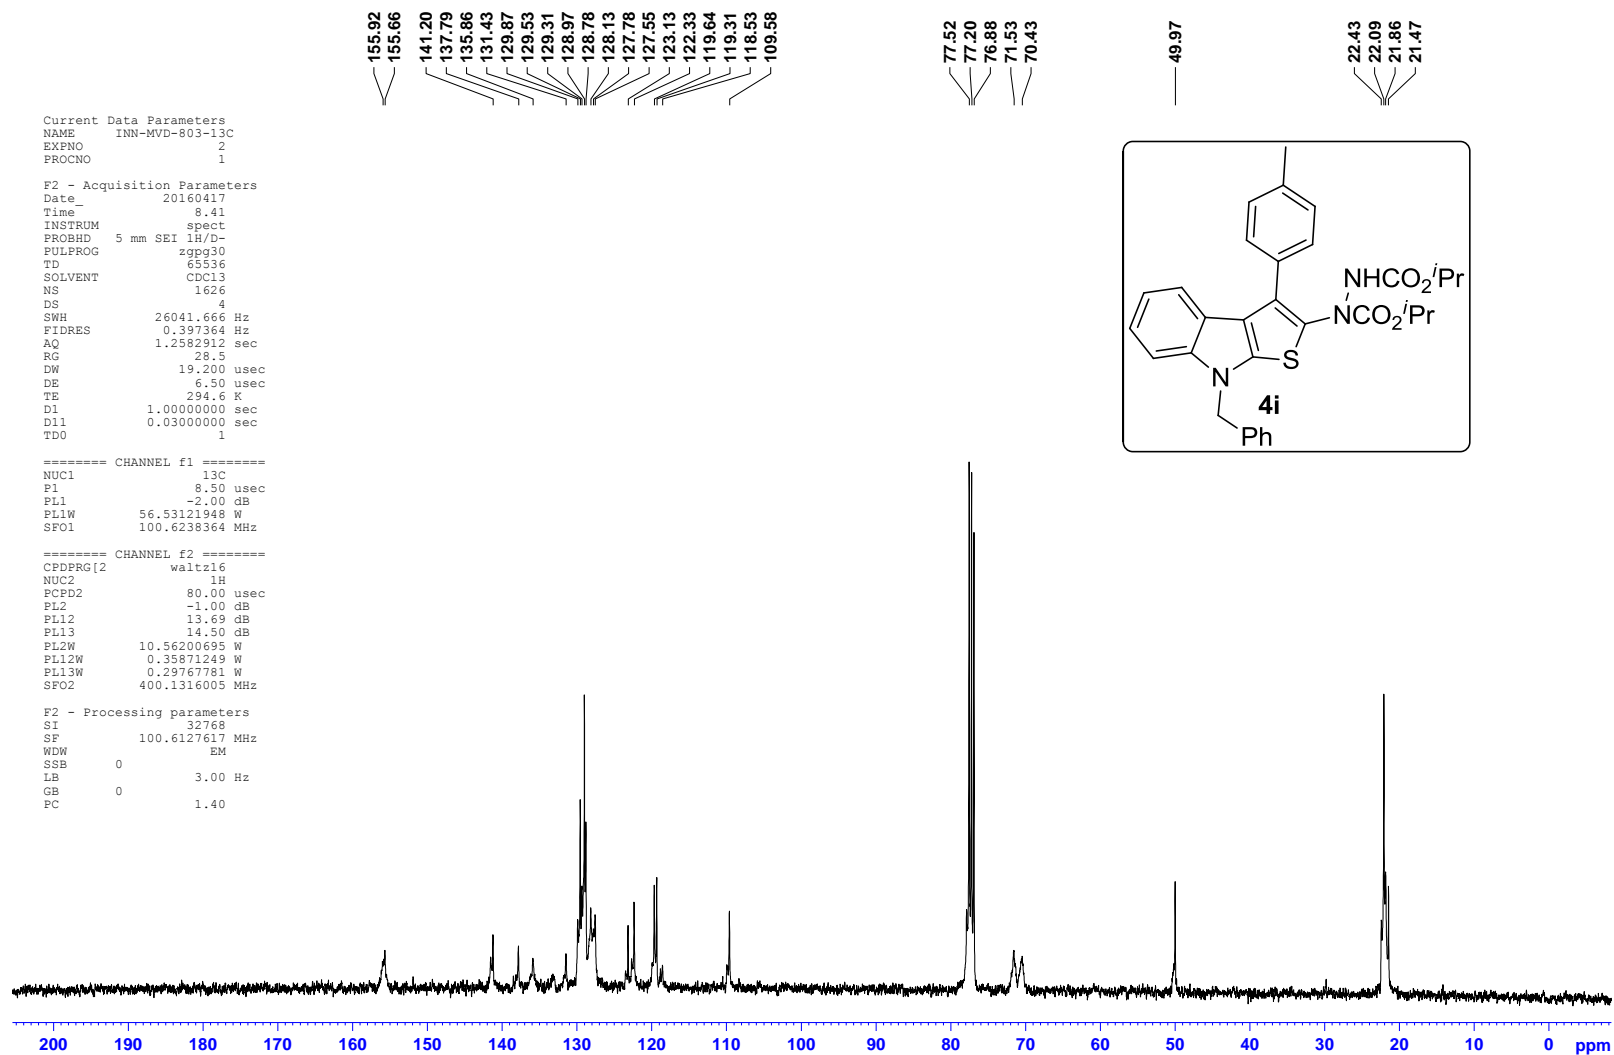

Figure S20. <sup>13</sup>C NMR Spectrum of 4i

Current Data Parameters  
NAME INN-MVD-805-1H  
EXPNO 1  
PROCNO 1

F2 - Acquisition Parameters  
Date\_ 20160712  
Time\_ 10.39  
INSTRUM spect  
PROBHD 5 mm PABBO BB/  
PULPROG zg30  
TD 65536  
SOLVENT CDCl3  
NS 18  
DS 2  
SWH 10000.000 Hz  
FIDRES 0.152588 Hz  
AQ 3.2767999 sec  
RG 69.35  
DW 50.000 usec  
DE 6.50 usec  
TE 294.9 K  
D1 1.00000000 sec  
TDO 1

==== CHANNEL f1 =====  
SFO1 500.1330885 MHz  
NUC1 1H  
P1 13.00 usec  
PLW1 13.00000000 W

F2 - Processing parameters  
SI 65536  
SF 500.1300146 MHz  
WDW EM  
SSB 0  
LB 0.30 Hz  
GB 0  
PC 1.00

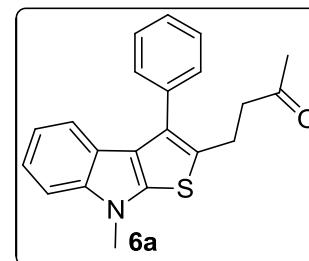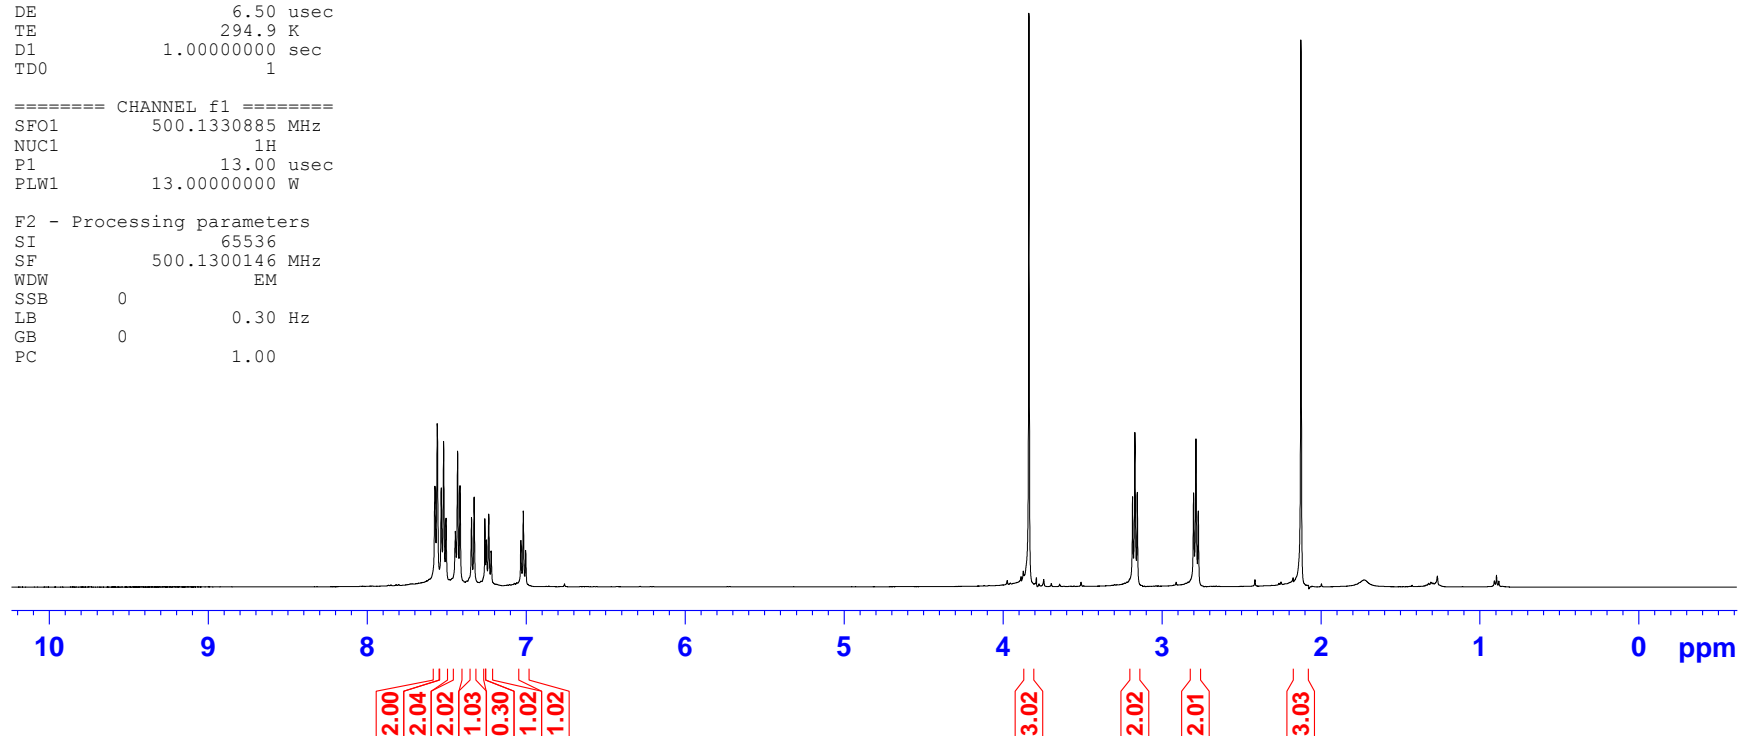

Figure S21. <sup>1</sup>H NMR Spectrum of 6a

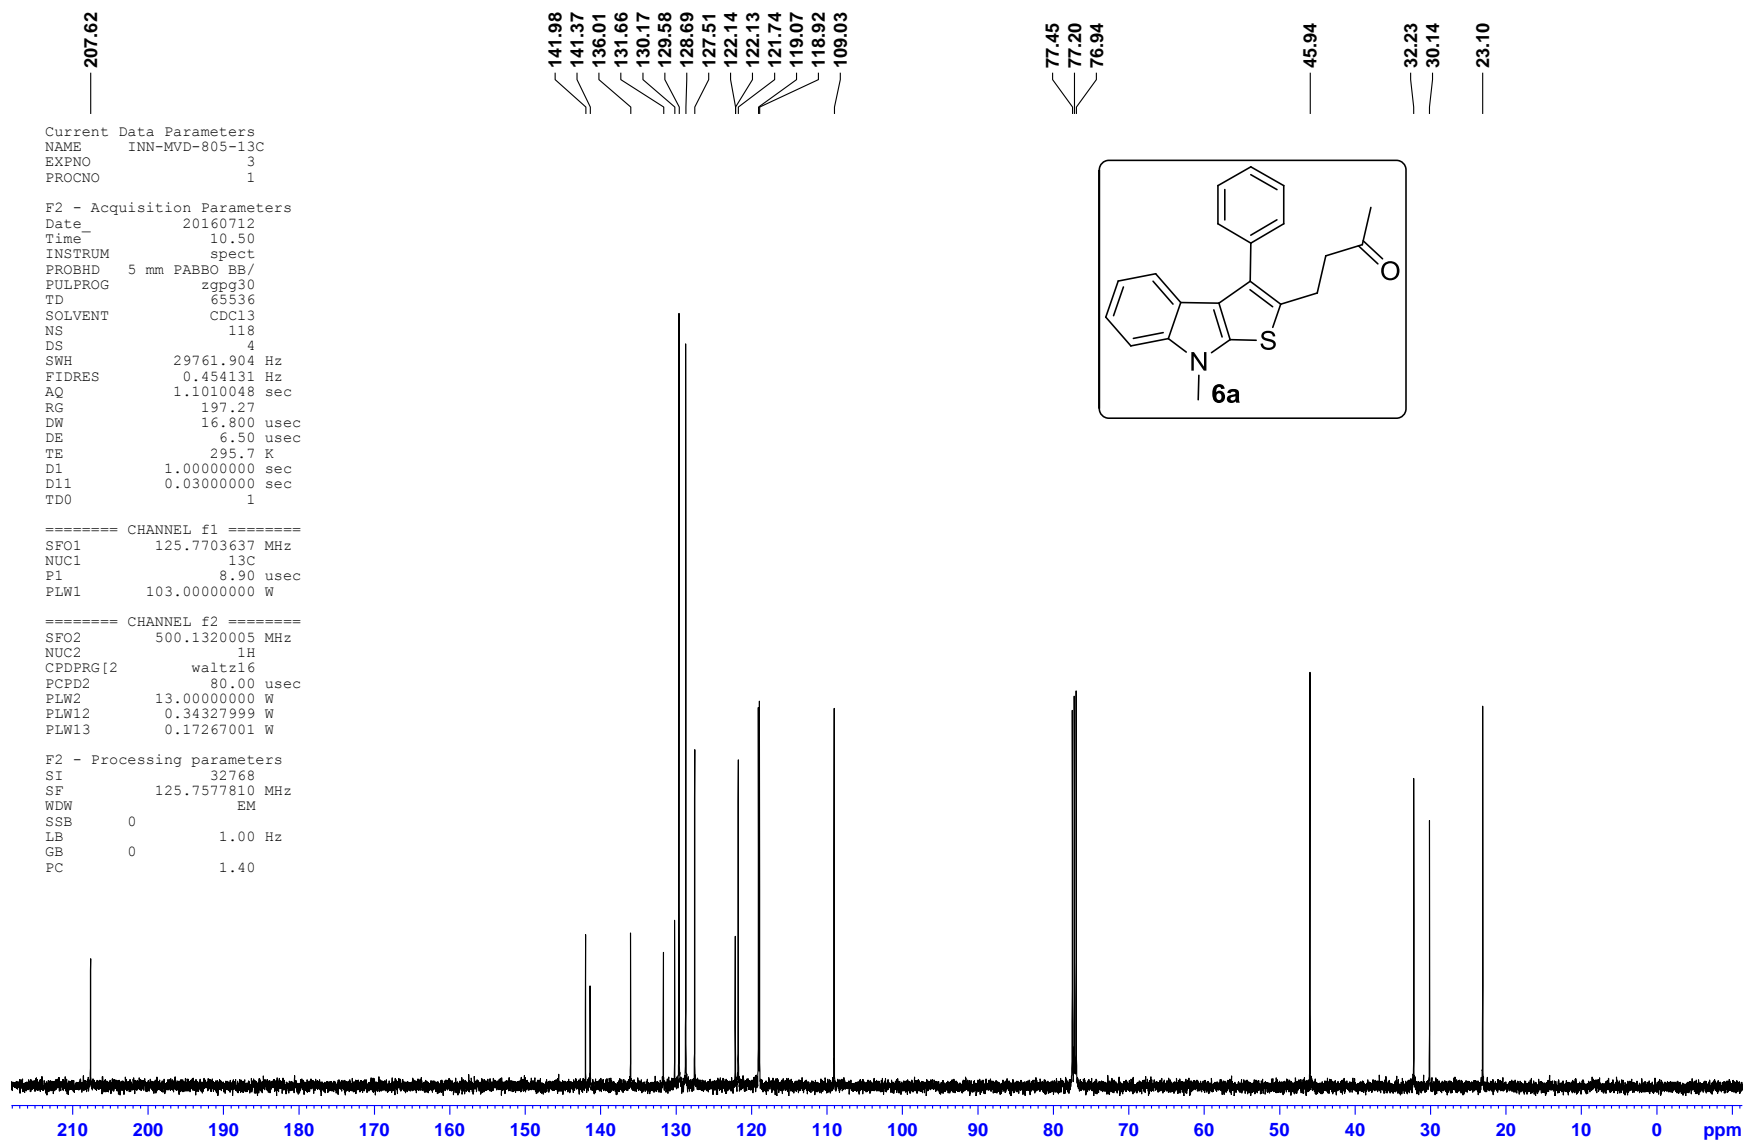

Figure S22.  $^{13}\text{C}$  NMR Spectrum of **6a**



```

Current Data Parameters
NAME      INN-MVD-596-1H
EXPNO    3
PROCNO    1

F2 - Acquisition Parameters
Date_     20150813
Time      16.26
INSTRUM   spect
PROBHD    5 mm PABBO BB/
PULPROG   zg30
TD        65536
SOLVENT   CDCl3
NS        16
DS        2
SWH       10000.000 Hz
FIDRES    0.152588 Hz
AQ        3.2767999 sec
RG        80.35
DW        50.000 usec
DE        6.50 usec
TE        298.6 K
D1        1.00000000 sec
TD0       1

===== CHANNEL f1 =====
SFO1      500.1330885 MHz
NUC1      1H
P1        13.00 usec
PLW1      13.00000000 W

F2 - Processing parameters
SI        65536
SF        500.1300123 MHz
WDW       EM
SSB       0
LB        0.30 Hz
GB        0
PC        1.00

```

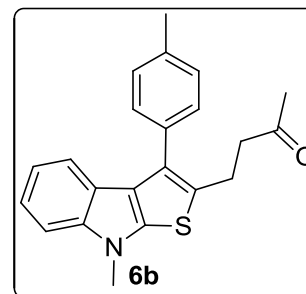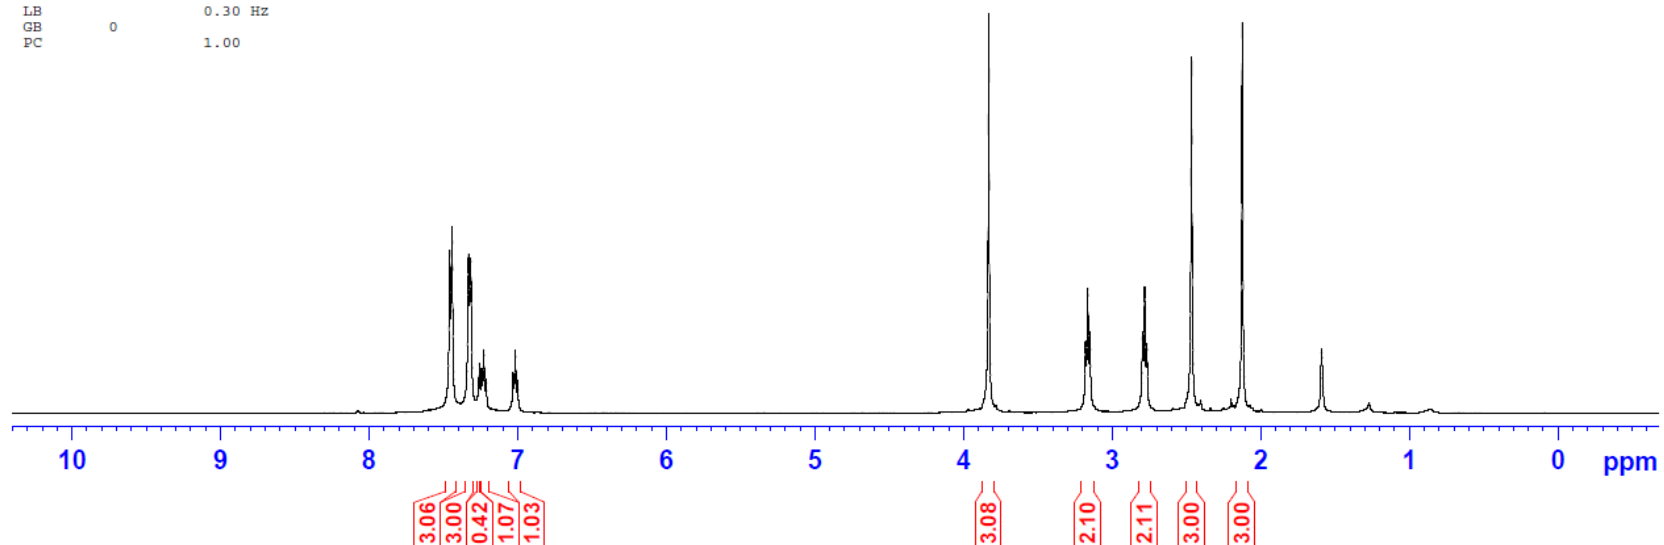

Figure S23. <sup>1</sup>H NMR Spectrum of **6b**

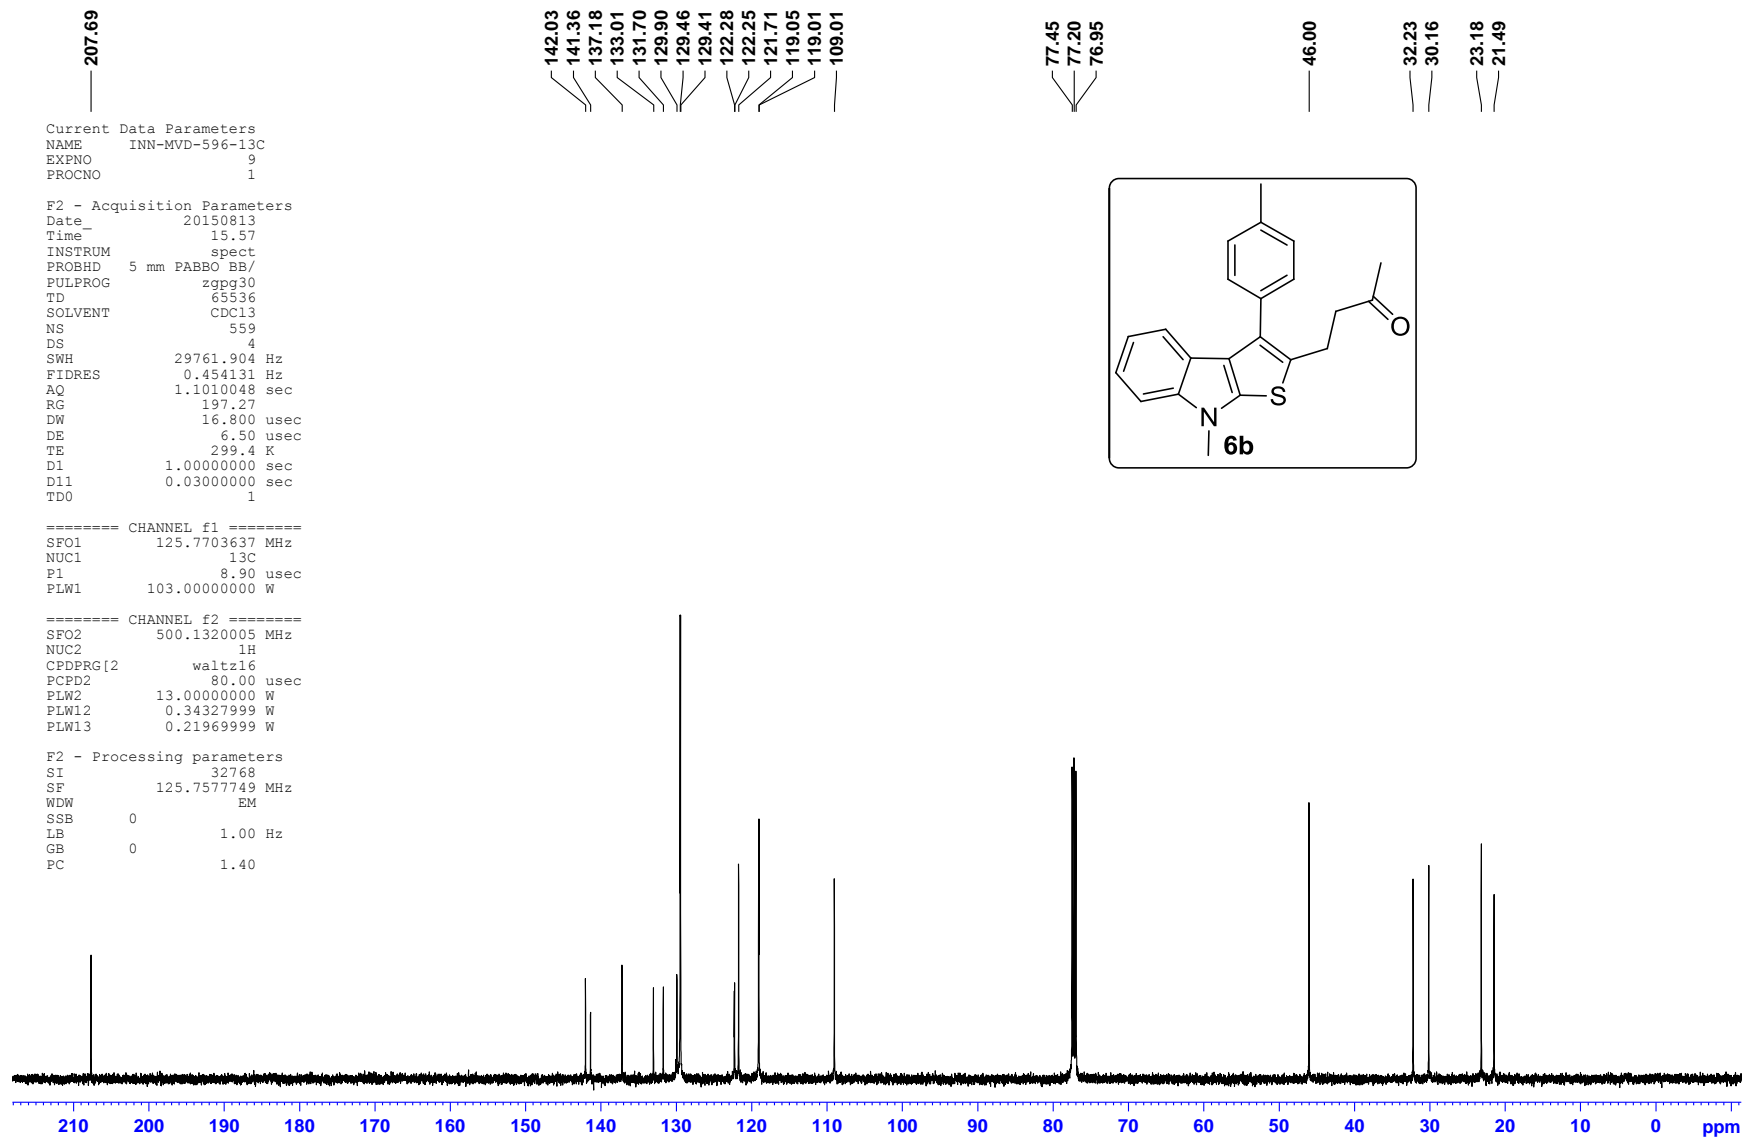

Figure S24.  $^{13}\text{C}$  NMR Spectrum of **6b**

Current Data Parameters  
NAME INN-MVD-614-1H  
EXPNO 1  
PROCNO 1

F2 - Acquisition Parameters  
Date\_ 20150823  
Time\_ 4.36  
INSTRUM spect  
PROBHD 5 mm PABBO BB-  
PULPROG zg30  
TD 54274  
SOLVENT CDCl3  
NS 25  
DS 0  
SWH 8223.685 Hz  
FIDRES 0.151522 Hz  
AQ 3.2998593 sec  
RG 80.6  
DW 60.800 usec  
DE 6.50 usec  
TE 296.2 K  
D1 1.00000000 sec  
TD0 1

==== CHANNEL f1 =====  
NUC1 1H  
P1 14.75 usec  
PL1 -1.00 dB  
PL1W 10.56200695 W  
SFO1 400.1324710 MHz

F2 - Processing parameters  
SI 32768  
SF 400.1300097 MHz  
WDW EM  
SSB 0  
LB 0.30 Hz  
GB 0  
PC 1.00

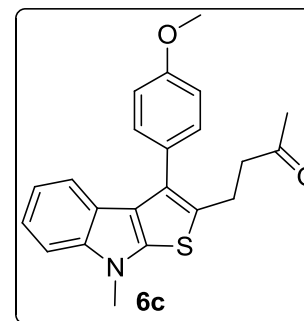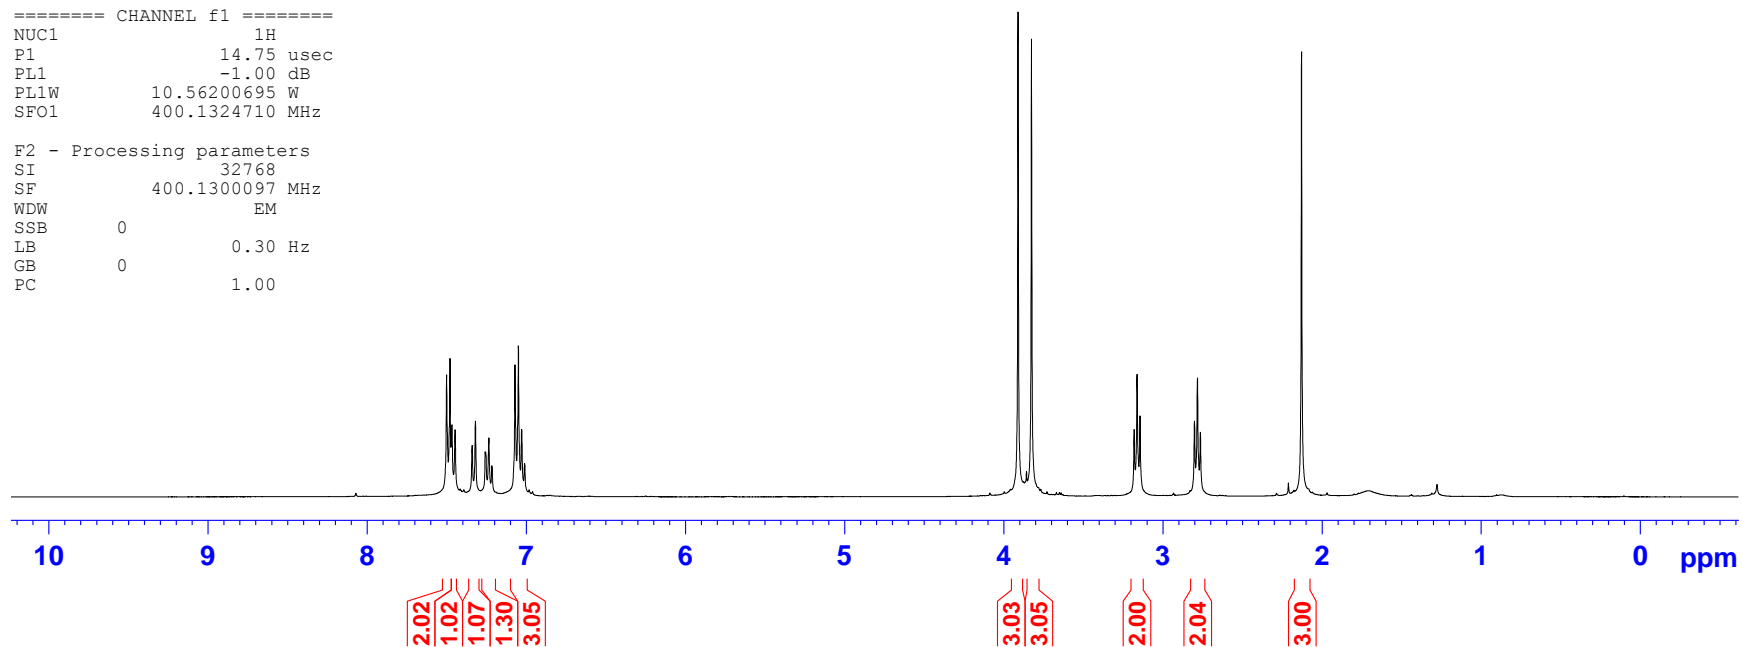

Figure S25. <sup>1</sup>H NMR Spectrum of **6c**

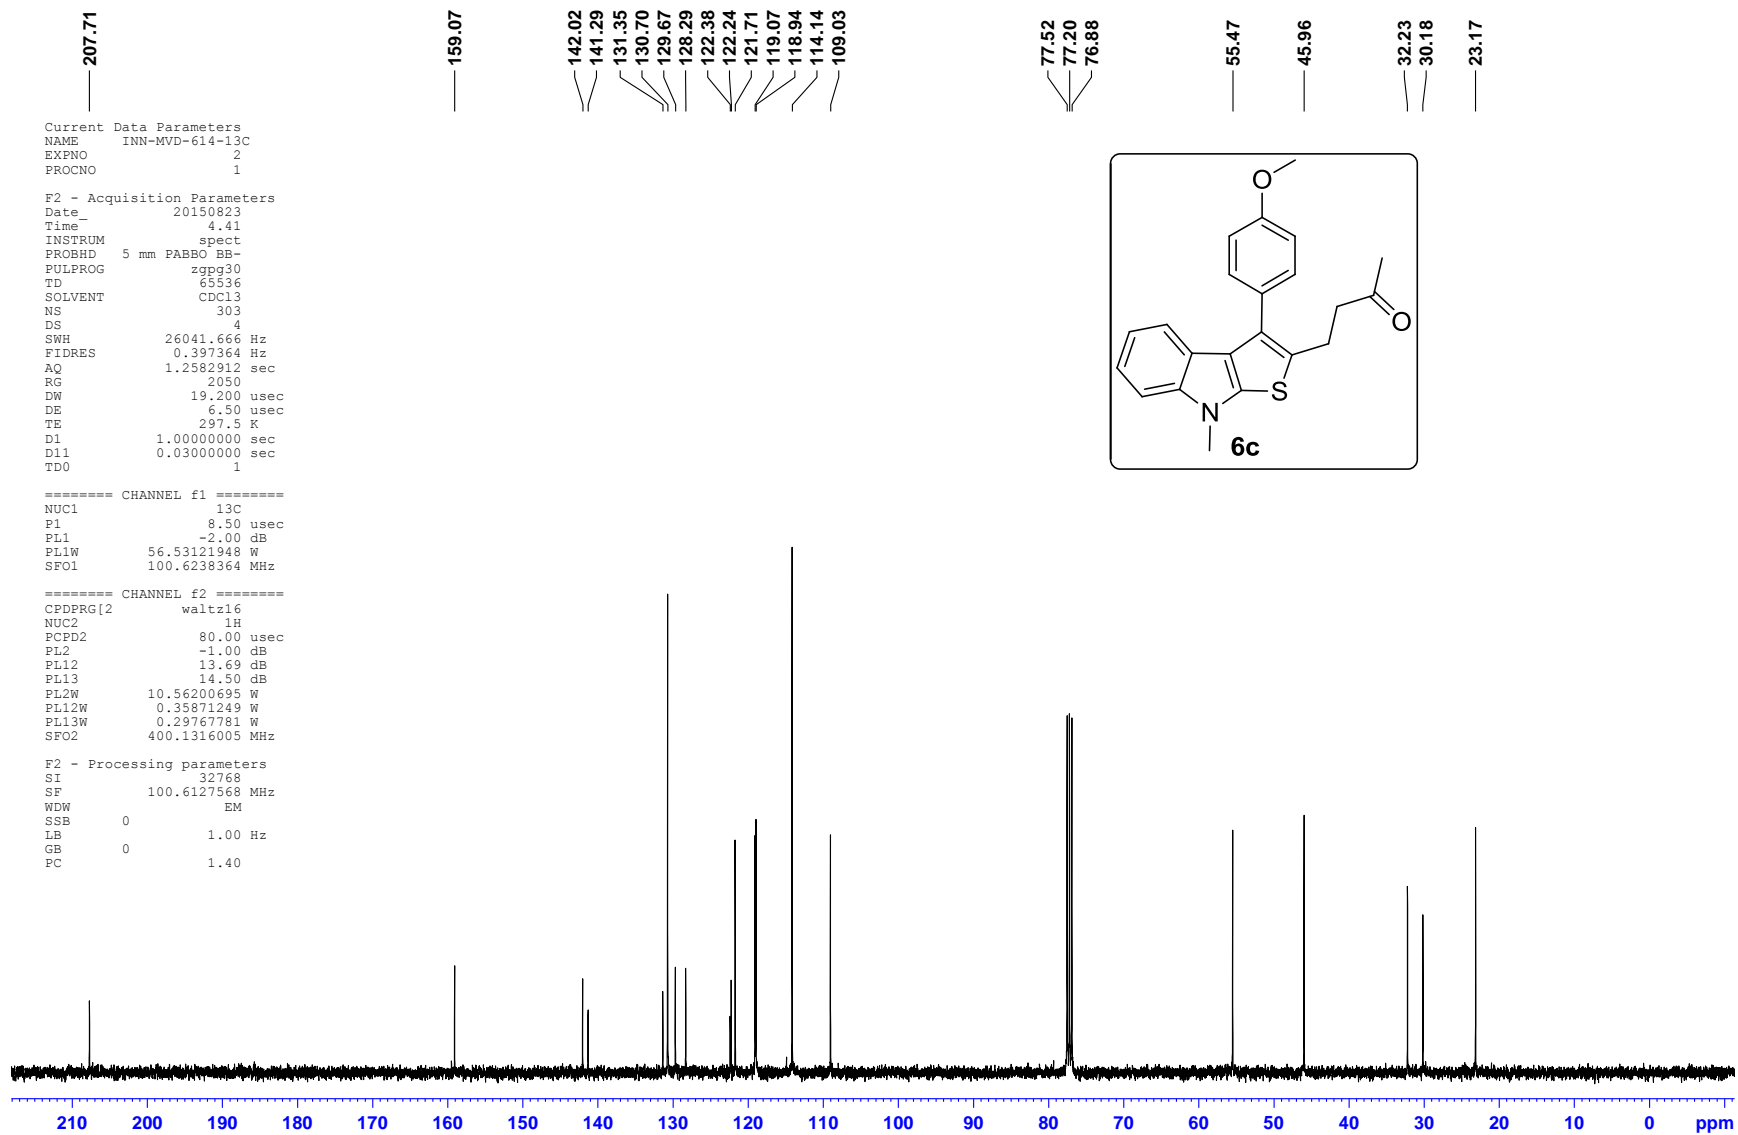

Figure S26. <sup>13</sup>C NMR Spectrum of **6c**

Current Data Parameters  
NAME INN-MVD-641-1H  
EXPNO 3  
PROCNO 1

F2 - Acquisition Parameters  
Date\_ 20150917  
Time\_ 19.31  
INSTRUM spect  
PROBHD 5 mm PABBO BB/  
PULPROG zg30  
TD 65536  
SOLVENT CDCl3  
NS 25  
DS 2  
SWH 10000.000 Hz  
FIDRES 0.152588 Hz  
AQ 3.2767999 sec  
RG 30.72  
DW 50.000 usec  
DE 6.50 usec  
TE 293.9 K  
D1 1.00000000 sec  
TD0 1

==== CHANNEL f1 =====  
SFO1 500.1330885 MHz  
NUC1 1H  
P1 13.00 usec  
PLW1 13.00000000 W

F2 - Processing parameters  
SI 65536  
SF 500.1300118 MHz  
WDW EM  
SSB 0  
LB 0.30 Hz  
GB 0  
PC 1.00

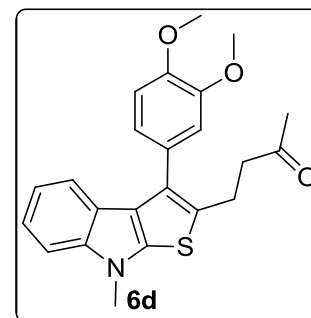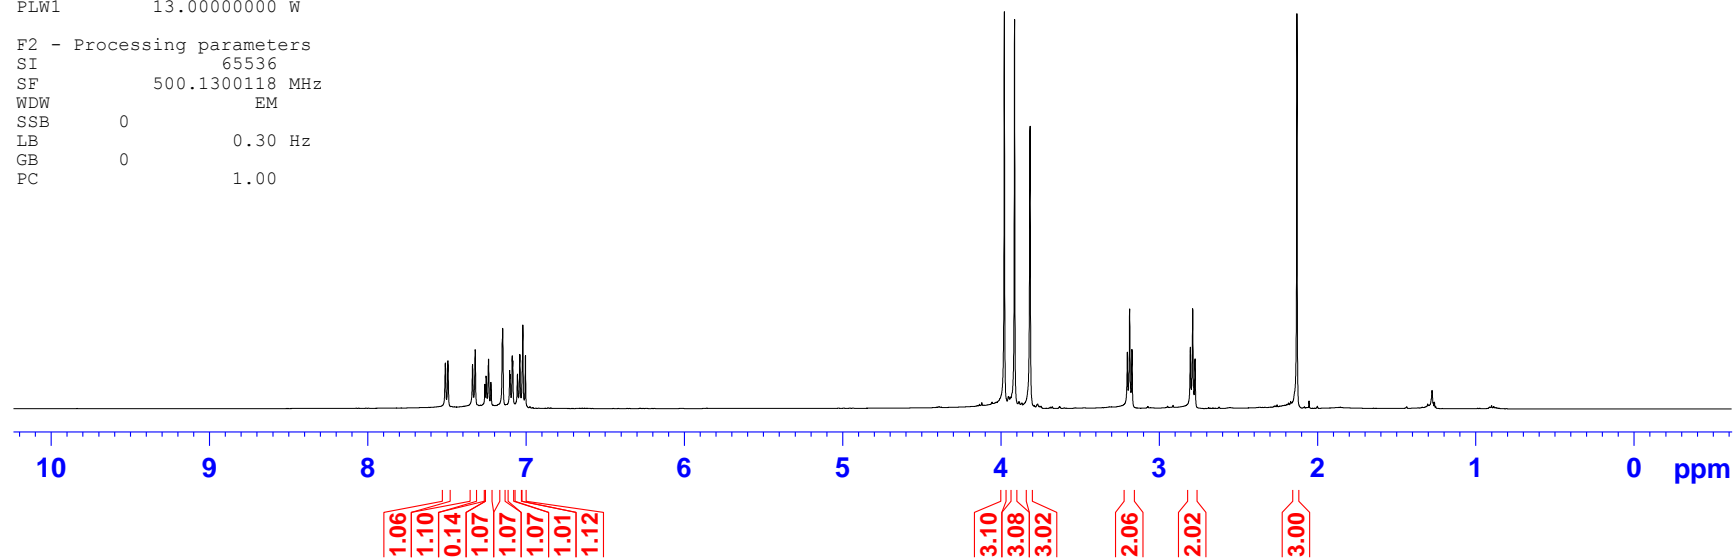

Figure S27. <sup>1</sup>H NMR Spectrum of **6d**

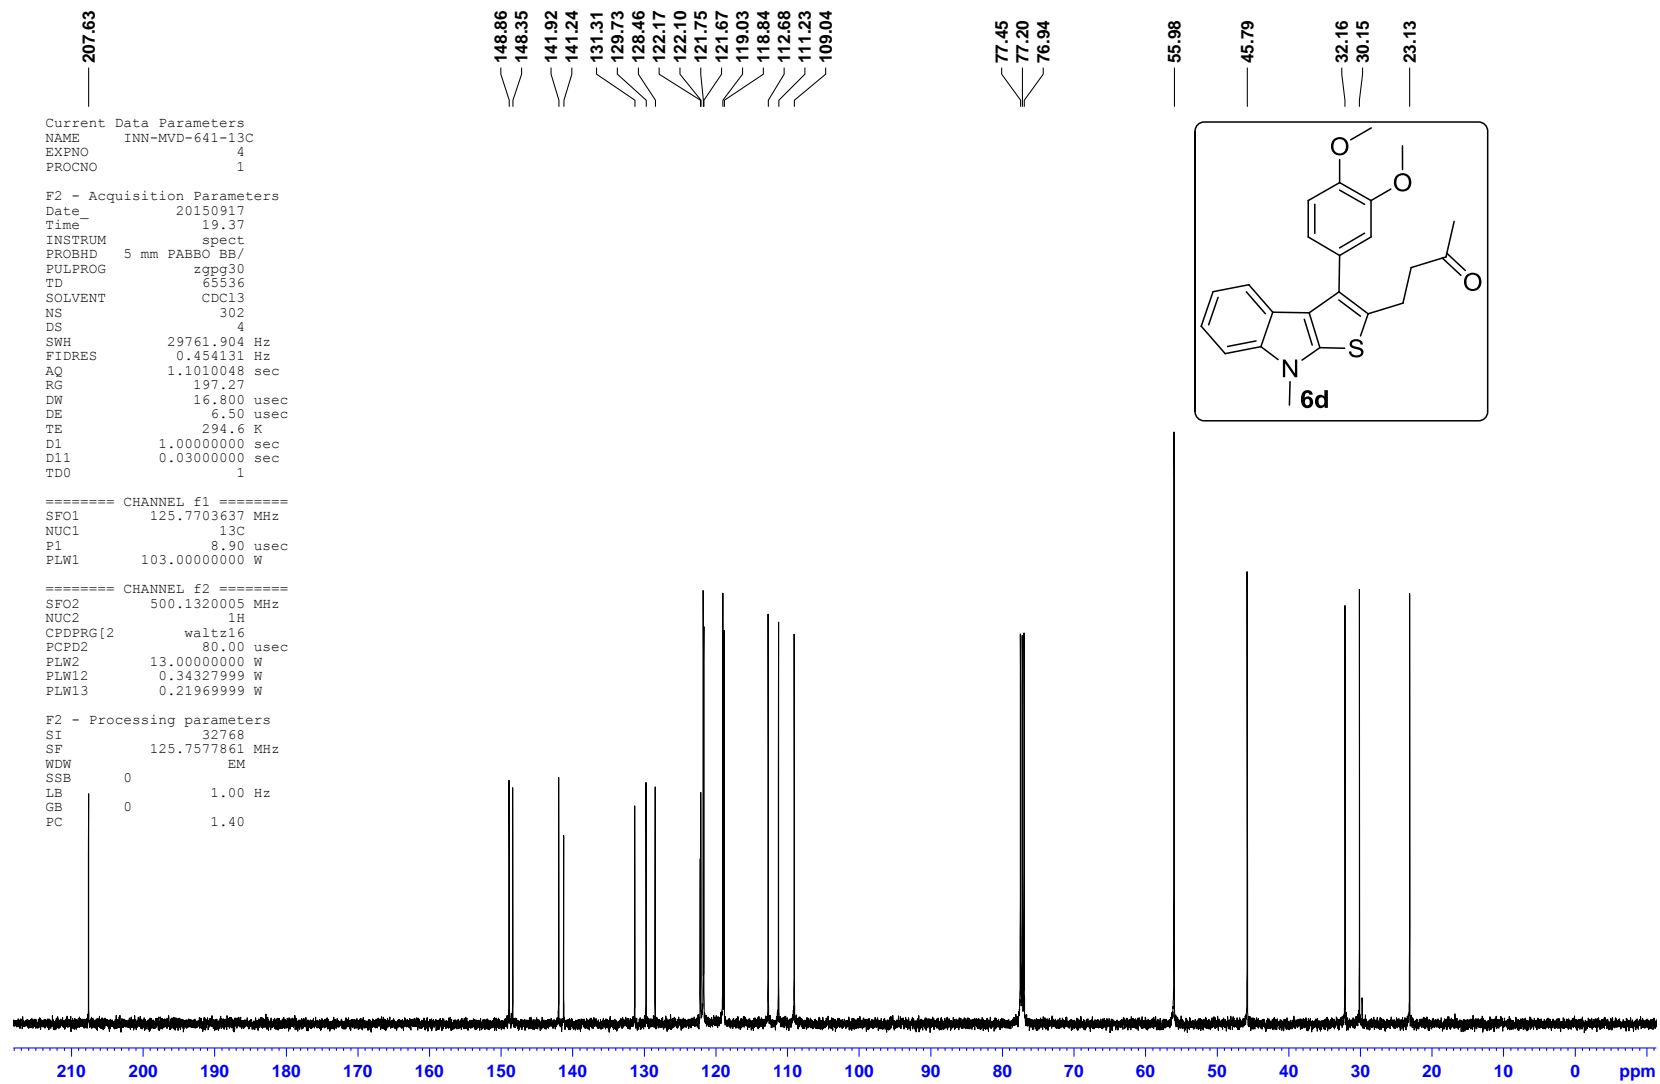

Figure S28.  $^{13}\text{C}$  NMR Spectrum of 6d

Current Data Parameters  
NAME INN-MVD--612-1H  
EXPNO 6  
PROCNO 1

F2 - Acquisition Parameters  
Date\_ 20161109  
Time 14.33  
INSTRUM spect  
PROBHD 5 mm PABBO BB/  
PULPROG zg30  
TD 65536  
SOLVENT CDC13  
NS 9  
DS 2  
SWH 10000.000 Hz  
FIDRES 0.152588 Hz  
AQ 3.2767999 sec  
RG 69.35  
DW 50.000 usec  
DE 6.50 usec  
TE 296.8 K  
D1 1.00000000 sec  
TD0 1

==== CHANNEL f1 =====  
SF01 500.1330885 MHz  
NUC1 1H  
P1 13.00 usec  
PLW1 13.00000000 W

F2 - Processing parameters  
SI 65536  
SF 500.1300112 MHz  
WDW EM  
SSB 0  
LB 0.30 Hz  
GB 0  
PC 1.00

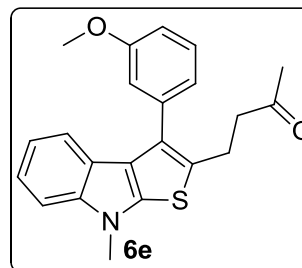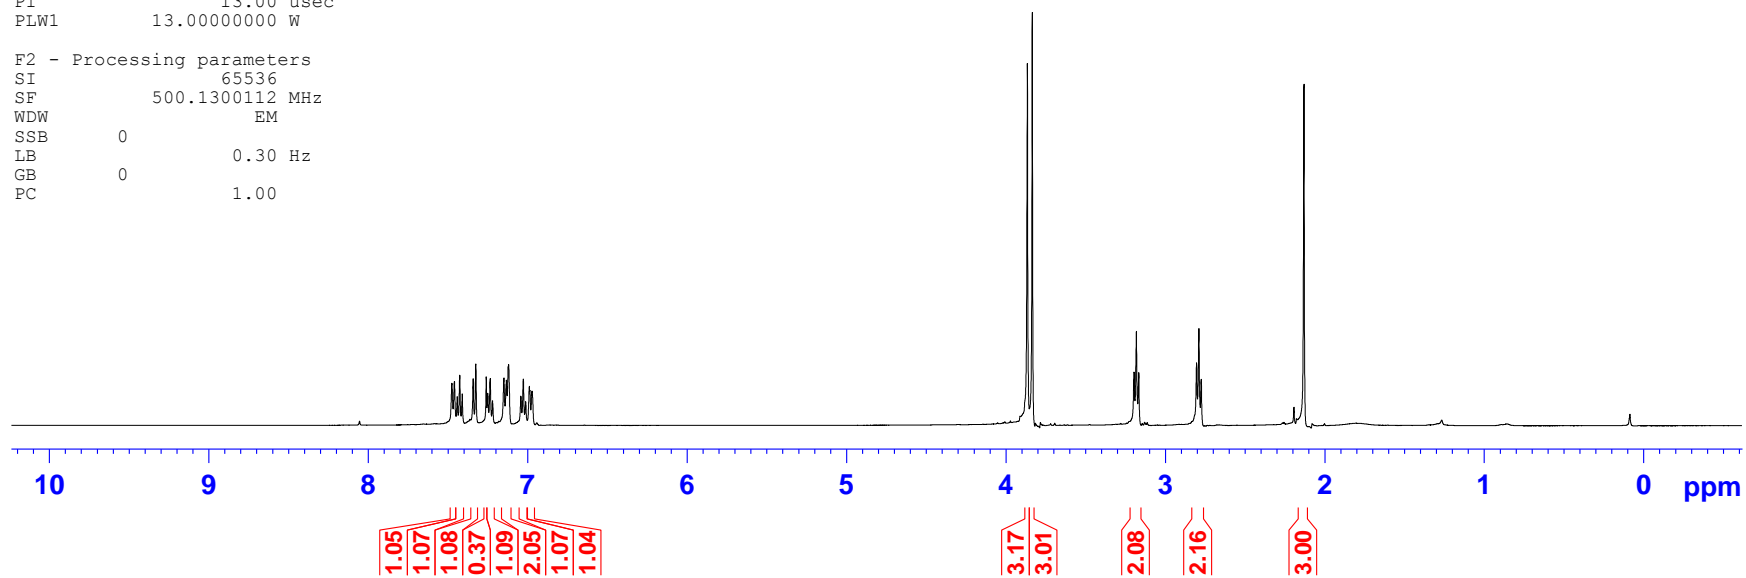

Figure S29. <sup>1</sup>H NMR Spectrum of 6e

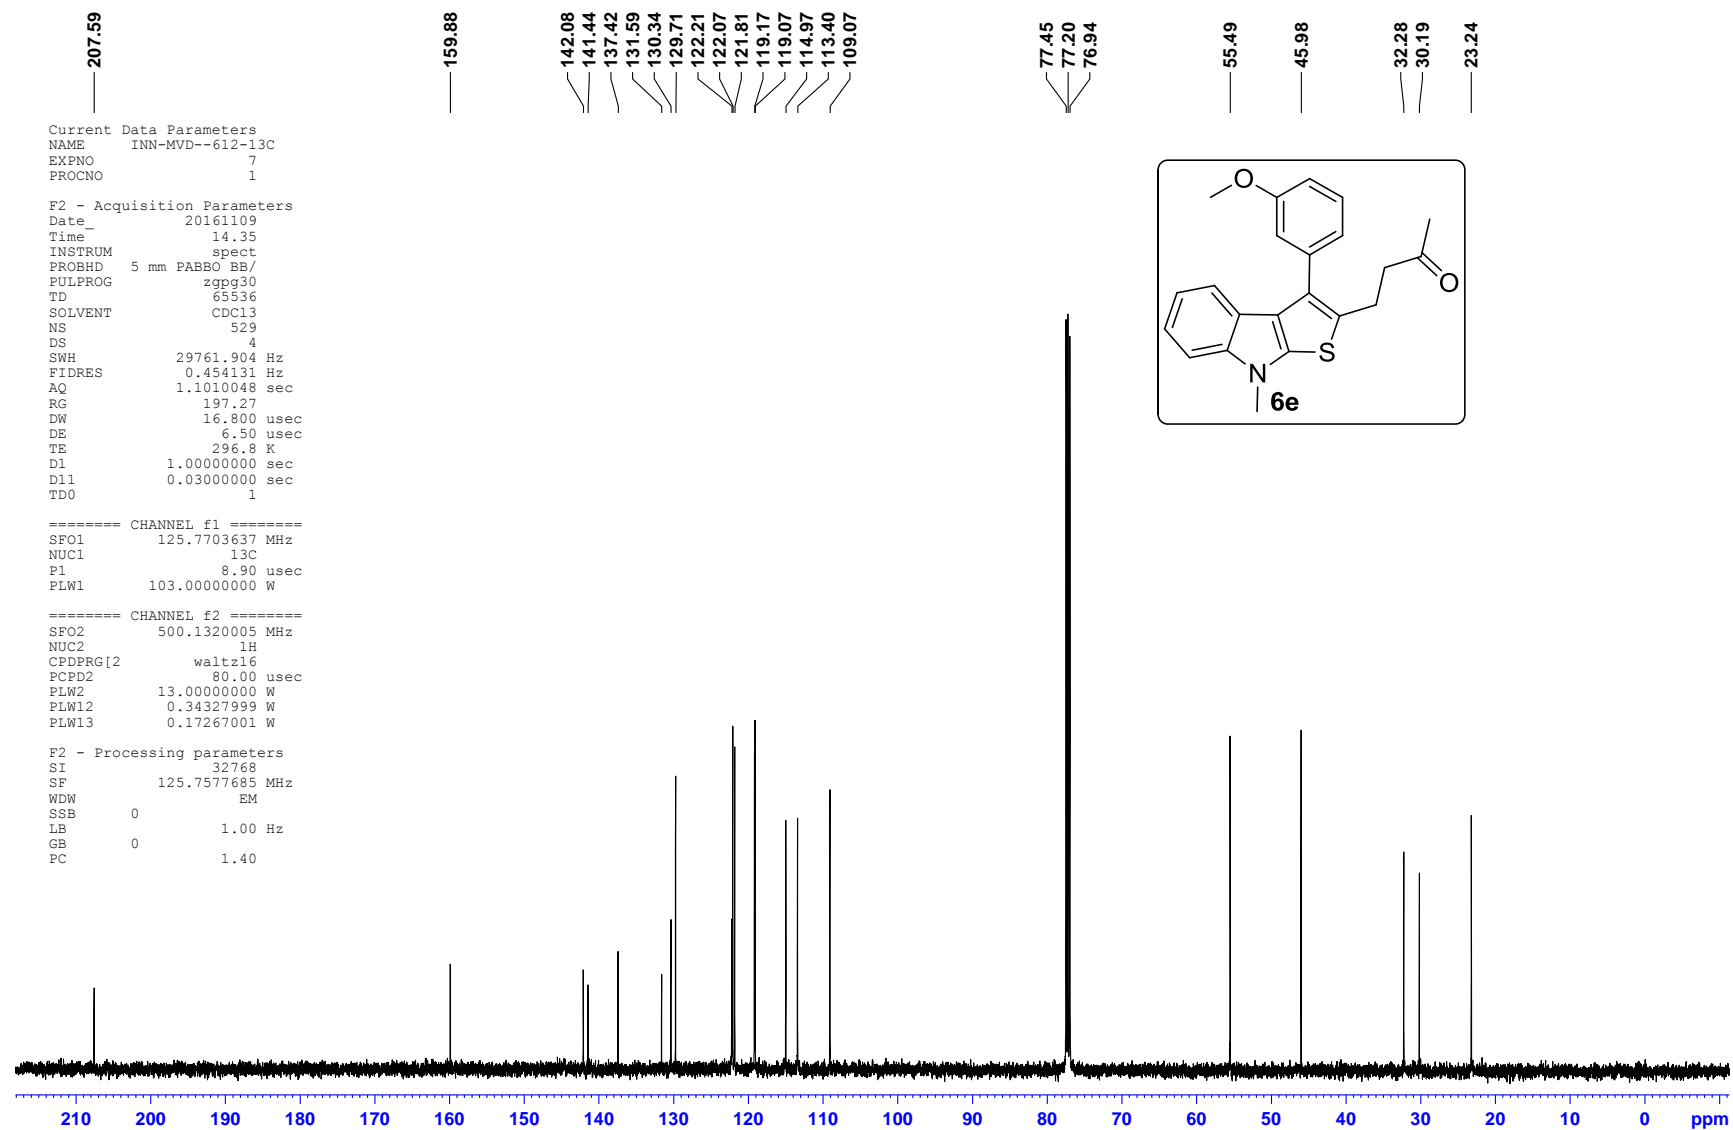

Figure S30.  $^{13}\text{C}$  NMR Spectrum of **6e**



Current Data Parameters  
NAME INN-MVD-638-1H  
EXPNO 7  
PROCNO 1

F2 - Acquisition Parameters  
Date\_ 20150918  
Time\_ 18.24  
INSTRUM spect  
PROBHD 5 mm PABBO BB/  
PULPROG zg30  
TD 65536  
SOLVENT CDCl3  
NS 25  
DS 2  
SWH 10000.000 Hz  
FIDRES 0.152588 Hz  
AQ 3.2767999 sec  
RG 15.73  
DW 50.000 usec  
DE 6.50 usec  
TE 296.7 K  
D1 1.00000000 sec  
TD0 1

==== CHANNEL f1 =====  
SFO1 500.1330885 MHz  
NUC1 1H  
P1 13.00 usec  
PLW1 13.00000000 W

F2 - Processing parameters  
SI 65536  
SF 500.1300116 MHz  
WDW EM  
SSB 0  
LB 0.30 Hz  
GB 0  
PC 1.00

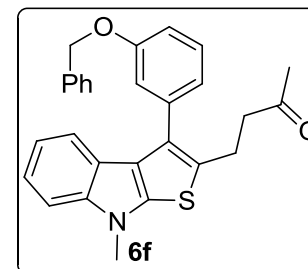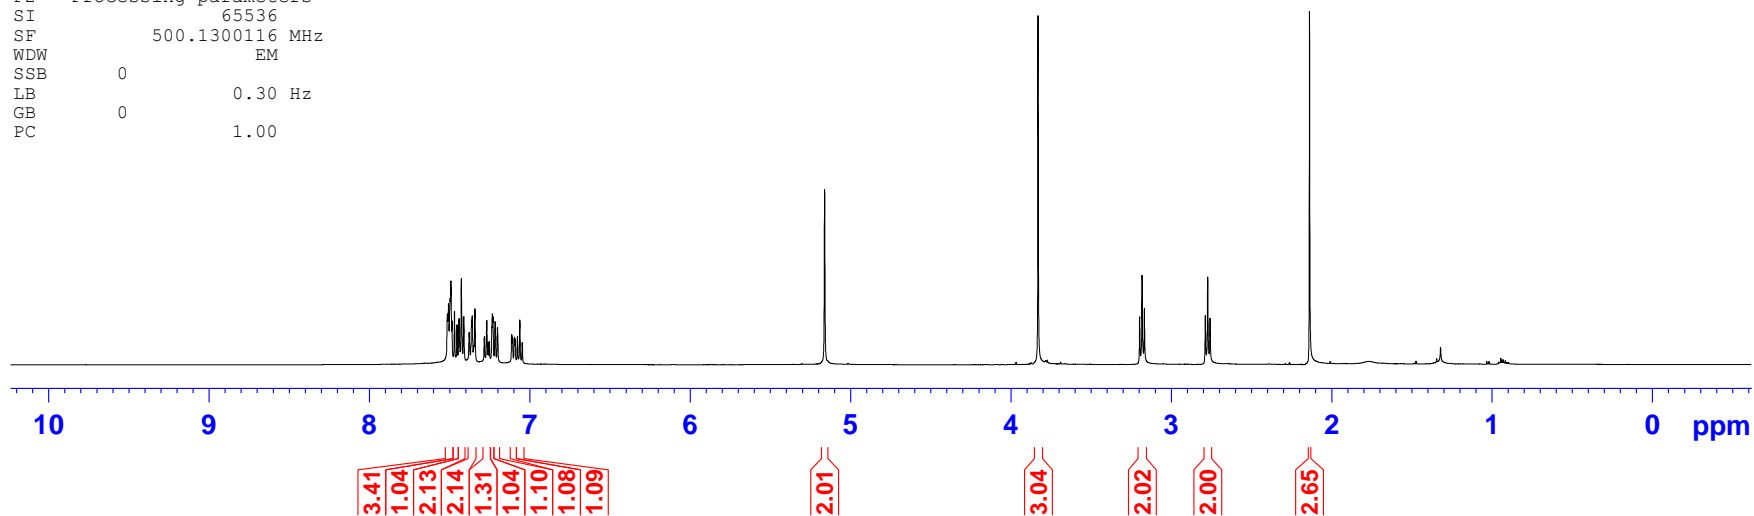

Figure S31. <sup>1</sup>H NMR Spectrum of **6f**

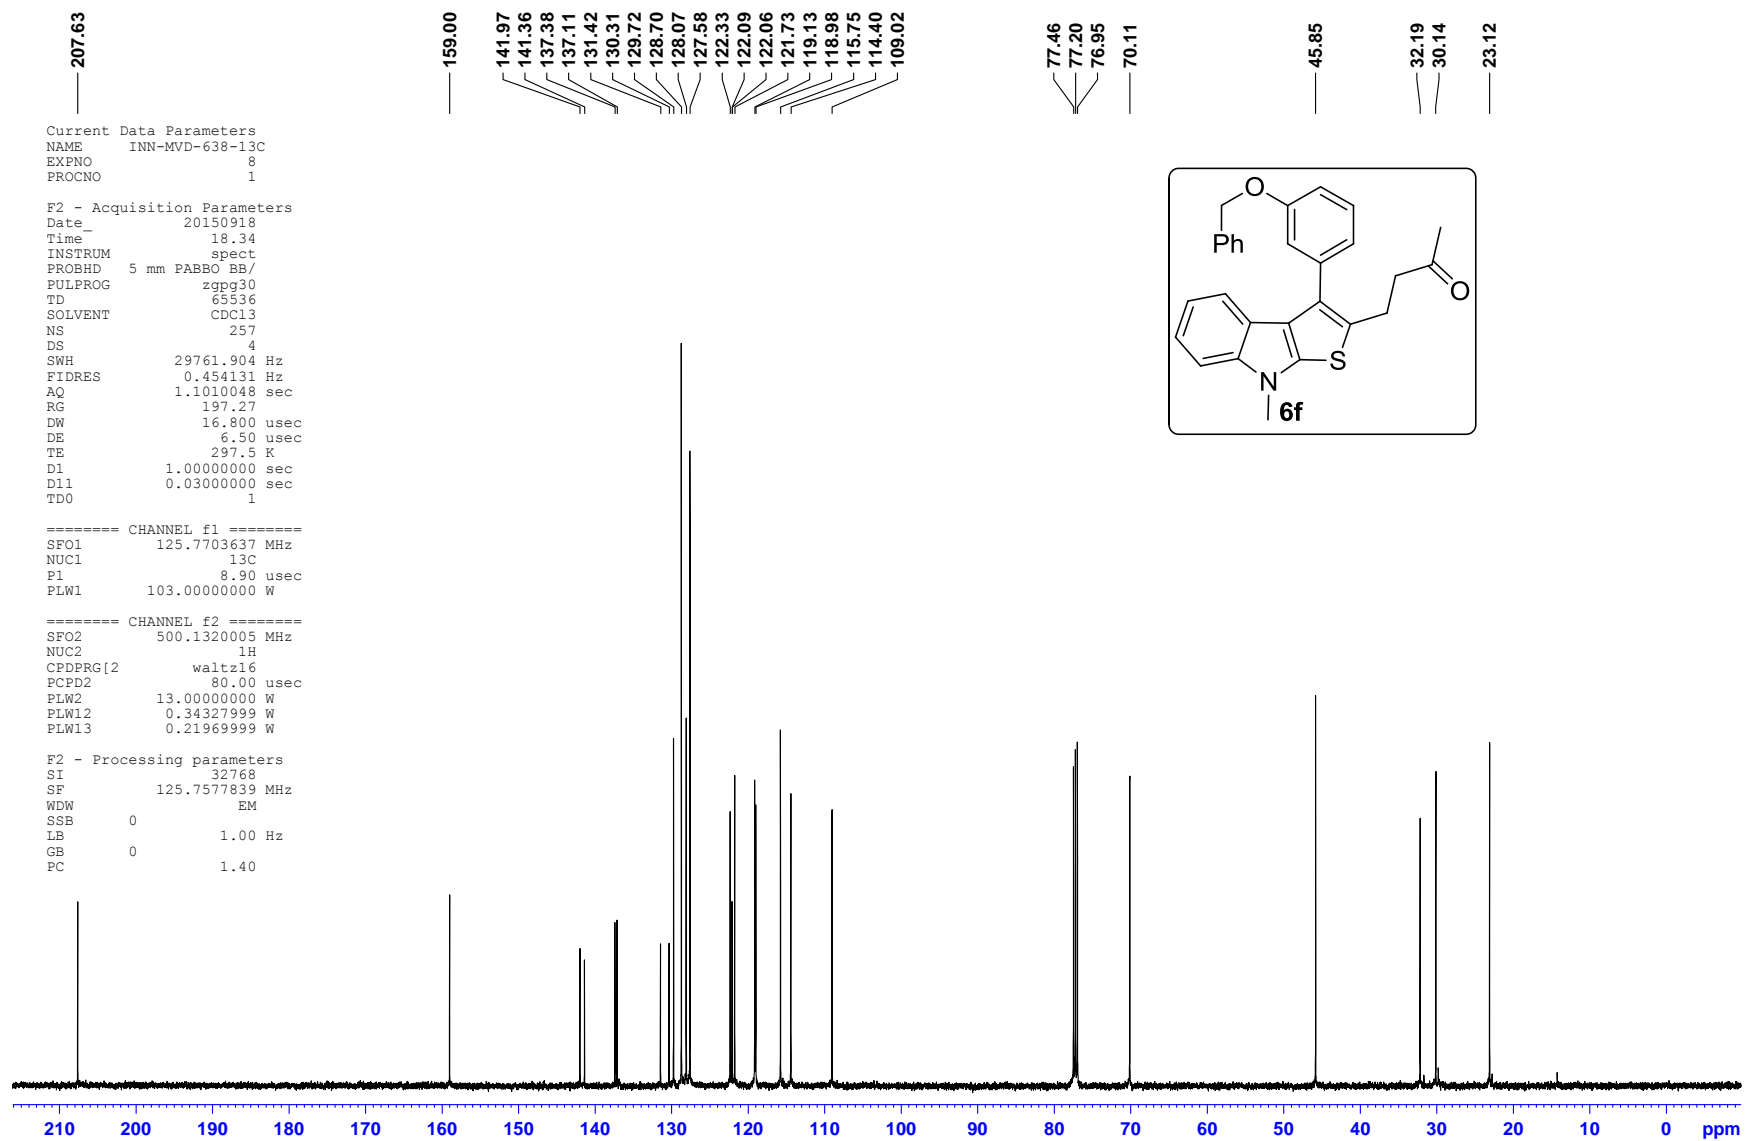

Figure S32.  $^{13}\text{C}$  NMR Spectrum of **6f**

Current Data Parameters  
NAME INN-MVD-639-1H  
EXPNO 3  
PROCNO 1

F2 - Acquisition Parameters  
Date\_ 20150917  
Time 10.51  
INSTRUM spect  
PROBHD 5 mm PABBO BB-  
PULPROG zg30  
TD 54274  
SOLVENT CDC13  
NS 21  
DS 0  
SWH 8223.685 Hz  
FIDRES 0.151522 Hz  
AQ 3.2998593 sec  
RG 64  
DW 60.800 usec  
DE 6.50 usec  
TE 301.8 K  
D1 1.00000000 sec  
TD0 1

==== CHANNEL f1 =====  
NUC1 1H  
P1 14.75 usec  
PL1 -1.00 dB  
PL1W 10.56200695 W  
SFO1 400.1324710 MHz

F2 - Processing parameters  
SI 32768  
SF 400.1300095 MHz  
WDW EM  
SSB 0  
LB 0.30 Hz  
GB 0  
PC 1.00

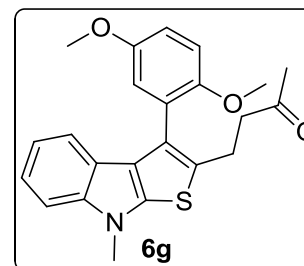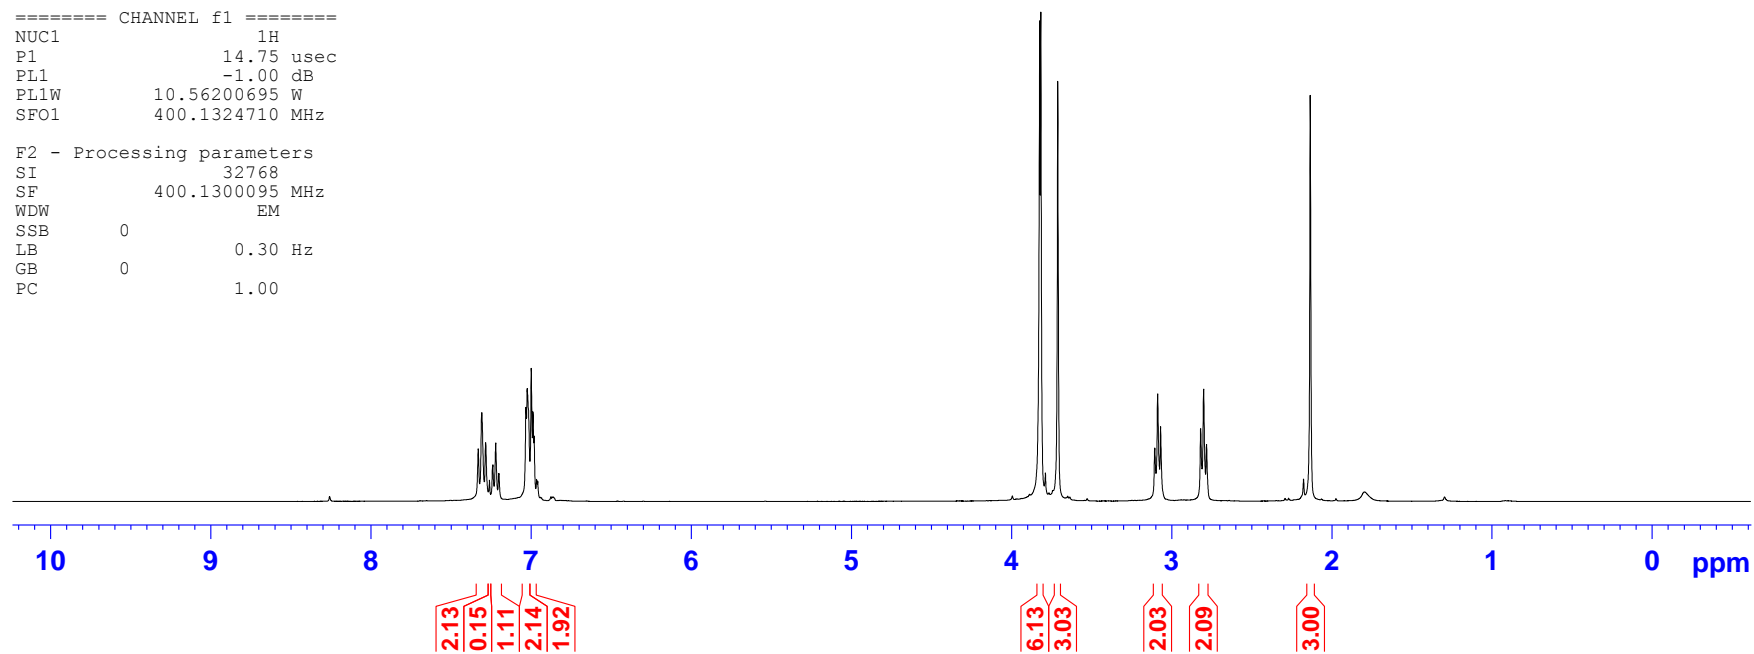

Figure S33. <sup>1</sup>H NMR Spectrum of **6g**

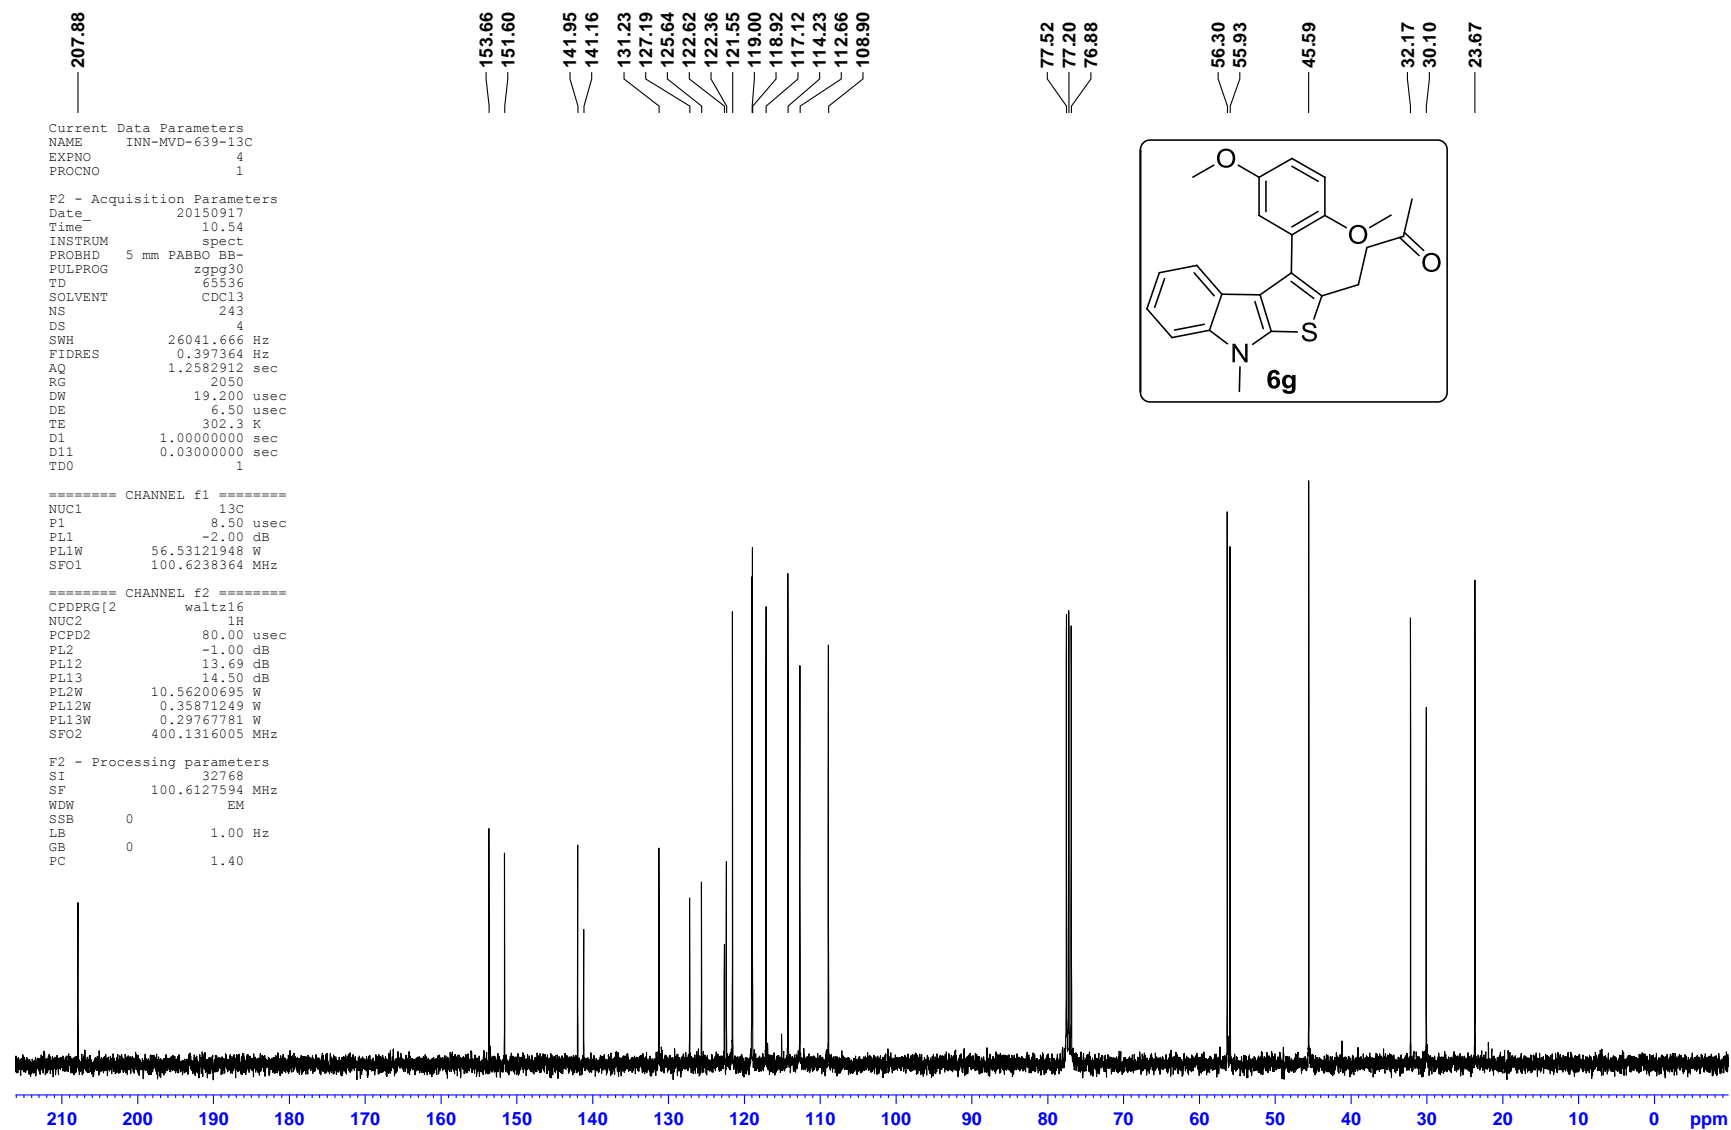

Figure S34.  $^{13}\text{C}$  NMR Spectrum of **6g**

Current Data Parameters  
NAME INN-MVD-611-1H  
EXPNO 5  
PROCNO 1

F2 - Acquisition Parameters  
Date\_ 20161109  
Time\_ 14.23  
INSTRUM spect  
PROBHD 5 mm PABBO BB/  
PULPROG zg30  
TD 65536  
SOLVENT CDCl3  
NS 6  
DS 2  
SWH 10000.000 Hz  
FIDRES 0.152588 Hz  
AQ 3.2767999 sec  
RG 30.72  
DW 50.000 usec  
DE 6.50 usec  
TE 297.5 K  
D1 1.00000000 sec  
TD0 1

==== CHANNEL f1 =====  
SFO1 500.1330885 MHz  
NUC1 1H  
P1 13.00 usec  
PLW1 13.00000000 W

F2 - Processing parameters  
SI 65536  
SF 500.1300208 MHz  
WDW EM  
SSB 0  
LB 0.30 Hz  
GB 0  
PC 1.00

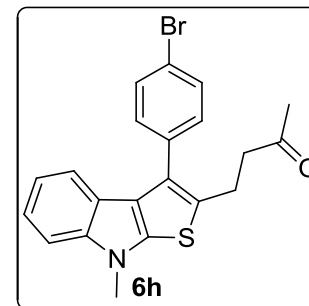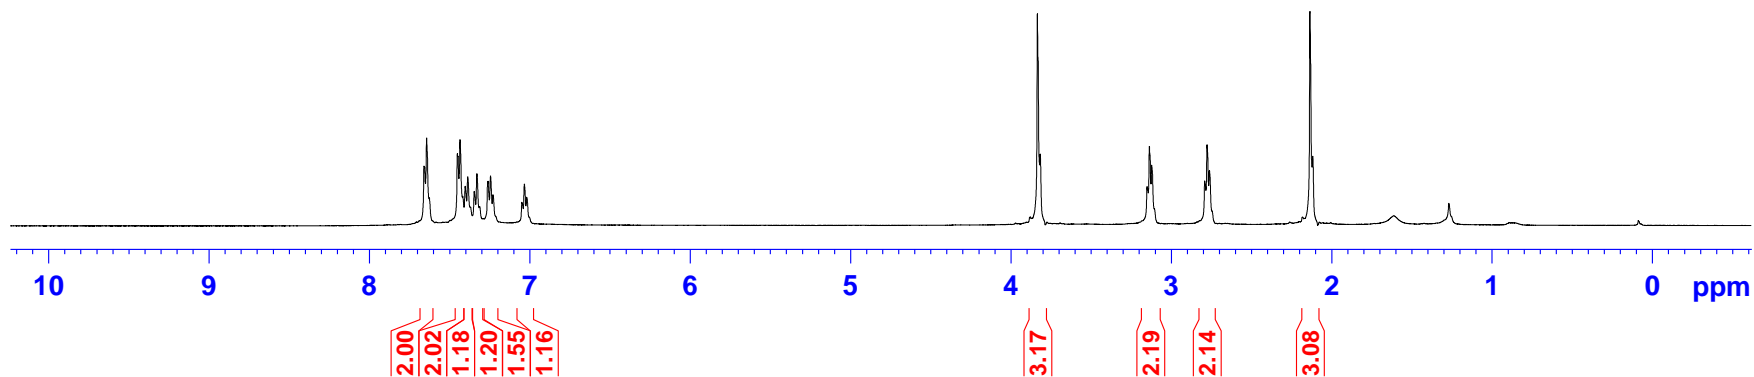

Figure S35. <sup>1</sup>H NMR Spectrum of **6h**

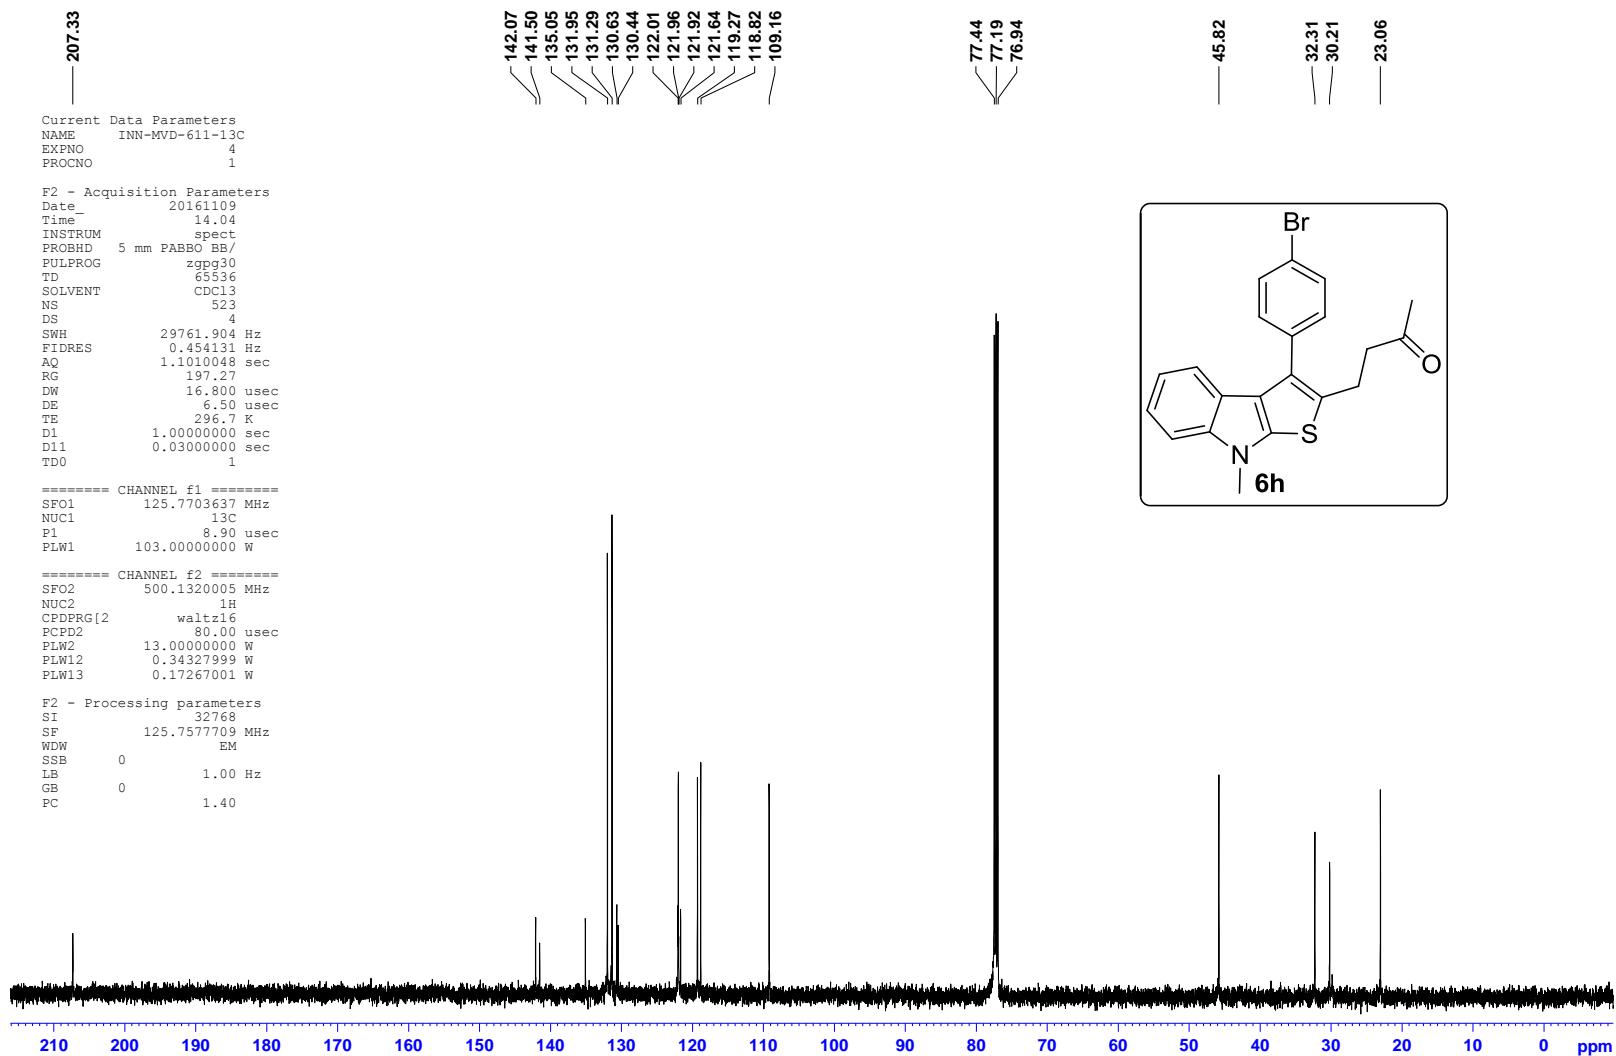

Figure S36.  $^{13}\text{C}$  NMR Spectrum of **6h**

Current Data Parameters  
NAME INN-MVD-597-1H  
EXPNO 7  
PROCNO 1

F2 - Acquisition Parameters

Date\_ 20150813  
Time\_ 15.37  
INSTRUM spect  
PROBHD 5 mm PABBO BB/  
PULPROG zg30  
TD 65536  
SOLVENT CDC13  
NS 30  
DS 2  
SWH 10000.000 Hz  
FIDRES 0.152588 Hz  
AQ 3.2767999 sec  
RG 30.72  
DW 50.000 usec  
DE 6.50 usec  
TE 299.2 K  
D1 1.00000000 sec  
TD0 1

==== CHANNEL f1 =====  
SFO1 500.1330885 MHz  
NUC1 1H  
P1 13.00 usec  
PLW1 13.00000000 W

F2 - Processing parameters  
SI 65536  
SF 500.1300042 MHz  
WDW EM  
SSB 0  
LB 0.30 Hz  
GB 0  
PC 1.00

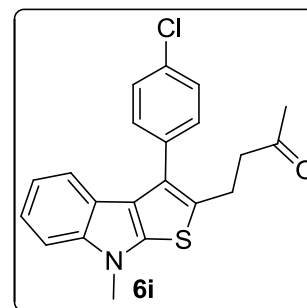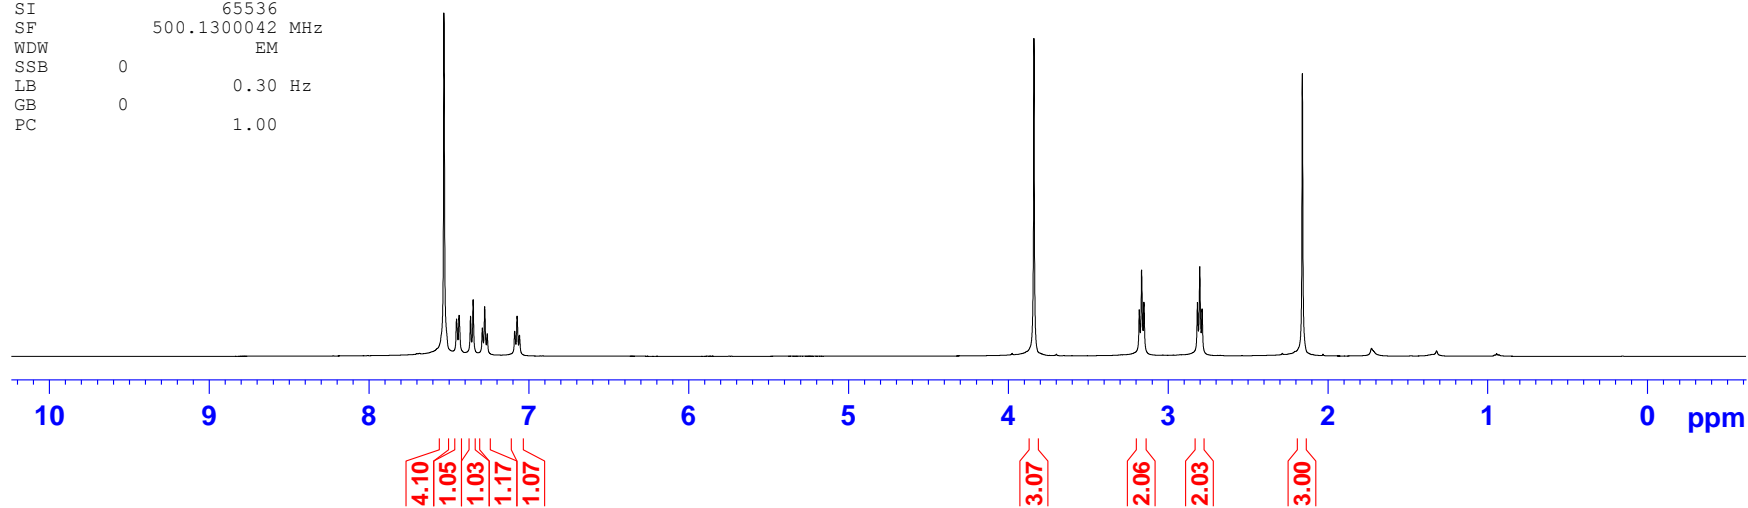

Figure S37. <sup>1</sup>H NMR Spectrum of **6i**

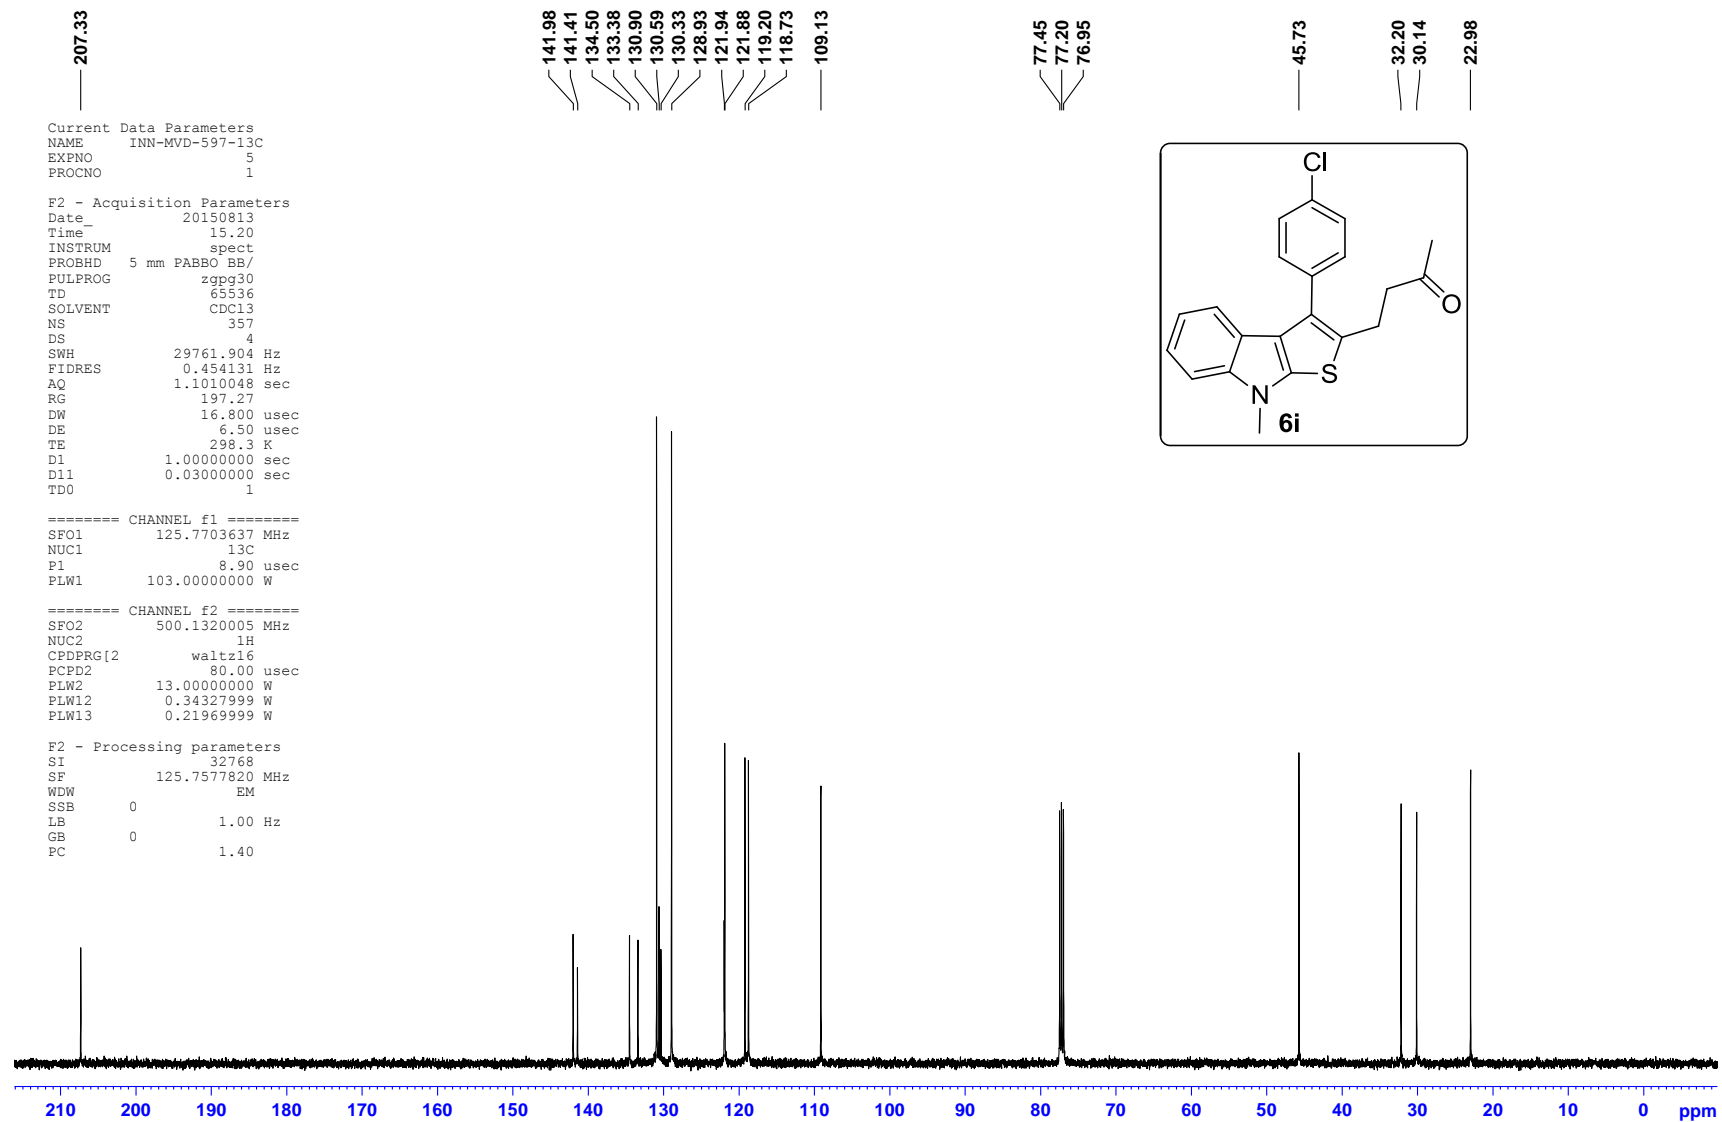

Figure S38.  $^{13}\text{C}$  NMR Spectrum of **6i**



Current Data Parameters  
NAME INN-MVD-606-1H  
EXPNO 9  
PROCNO 1

F2 - Acquisition Parameters  
Date\_ 20150814  
Time 20.17  
INSTRUM spect  
PROBHD 5 mm PABBO BB/  
PULPROG zg30  
TD 65536  
SOLVENT CDC13  
NS 25  
DS 2  
SWH 10000.000 Hz  
FIDRES 0.152588 Hz  
AQ 3.2767999 sec  
RG 30.72  
DW 50.000 usec  
DE 6.50 usec  
TE 297.1 K  
D1 1.00000000 sec  
TD0 1

==== CHANNEL f1 =====  
SF01 500.1330885 MHz  
NUC1 1H  
P1 13.00 usec  
PLW1 13.00000000 W

F2 - Processing parameters  
SI 65536  
SF 500.1300016 MHz  
WDW EM  
SSB 0  
LB 0.30 Hz  
GB 0  
PC 1.00

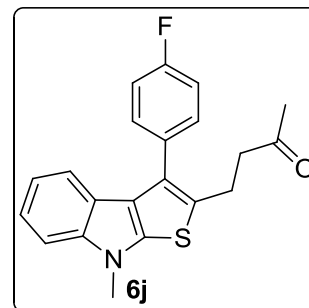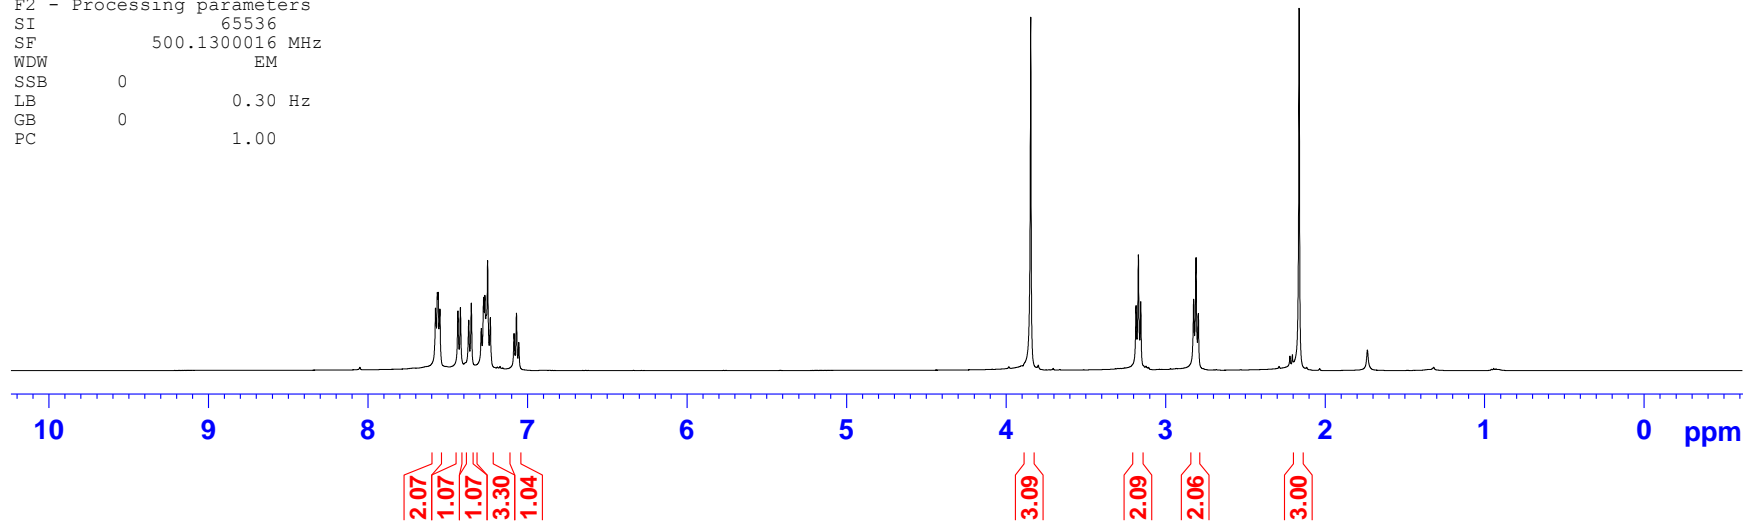

Figure S39. <sup>1</sup>H NMR Spectrum of **6j**

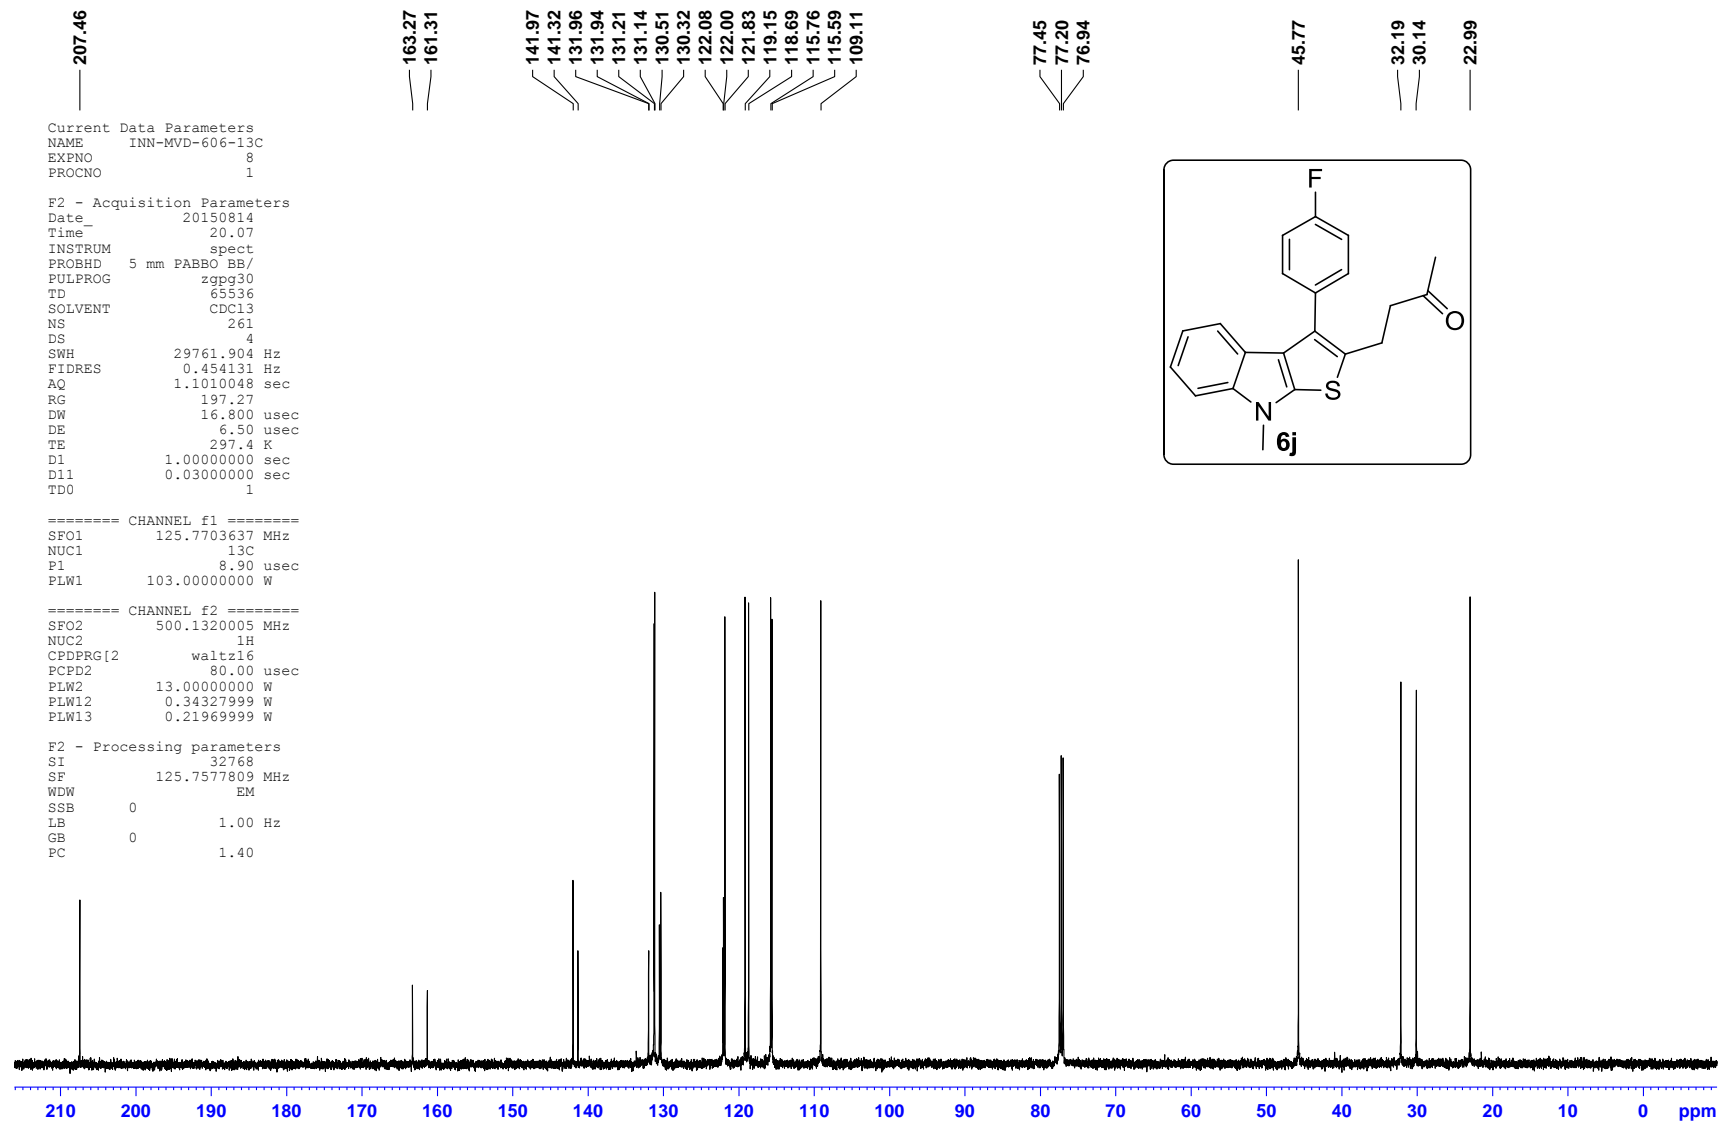

Figure S40. <sup>13</sup>C NMR Spectrum of **6j**

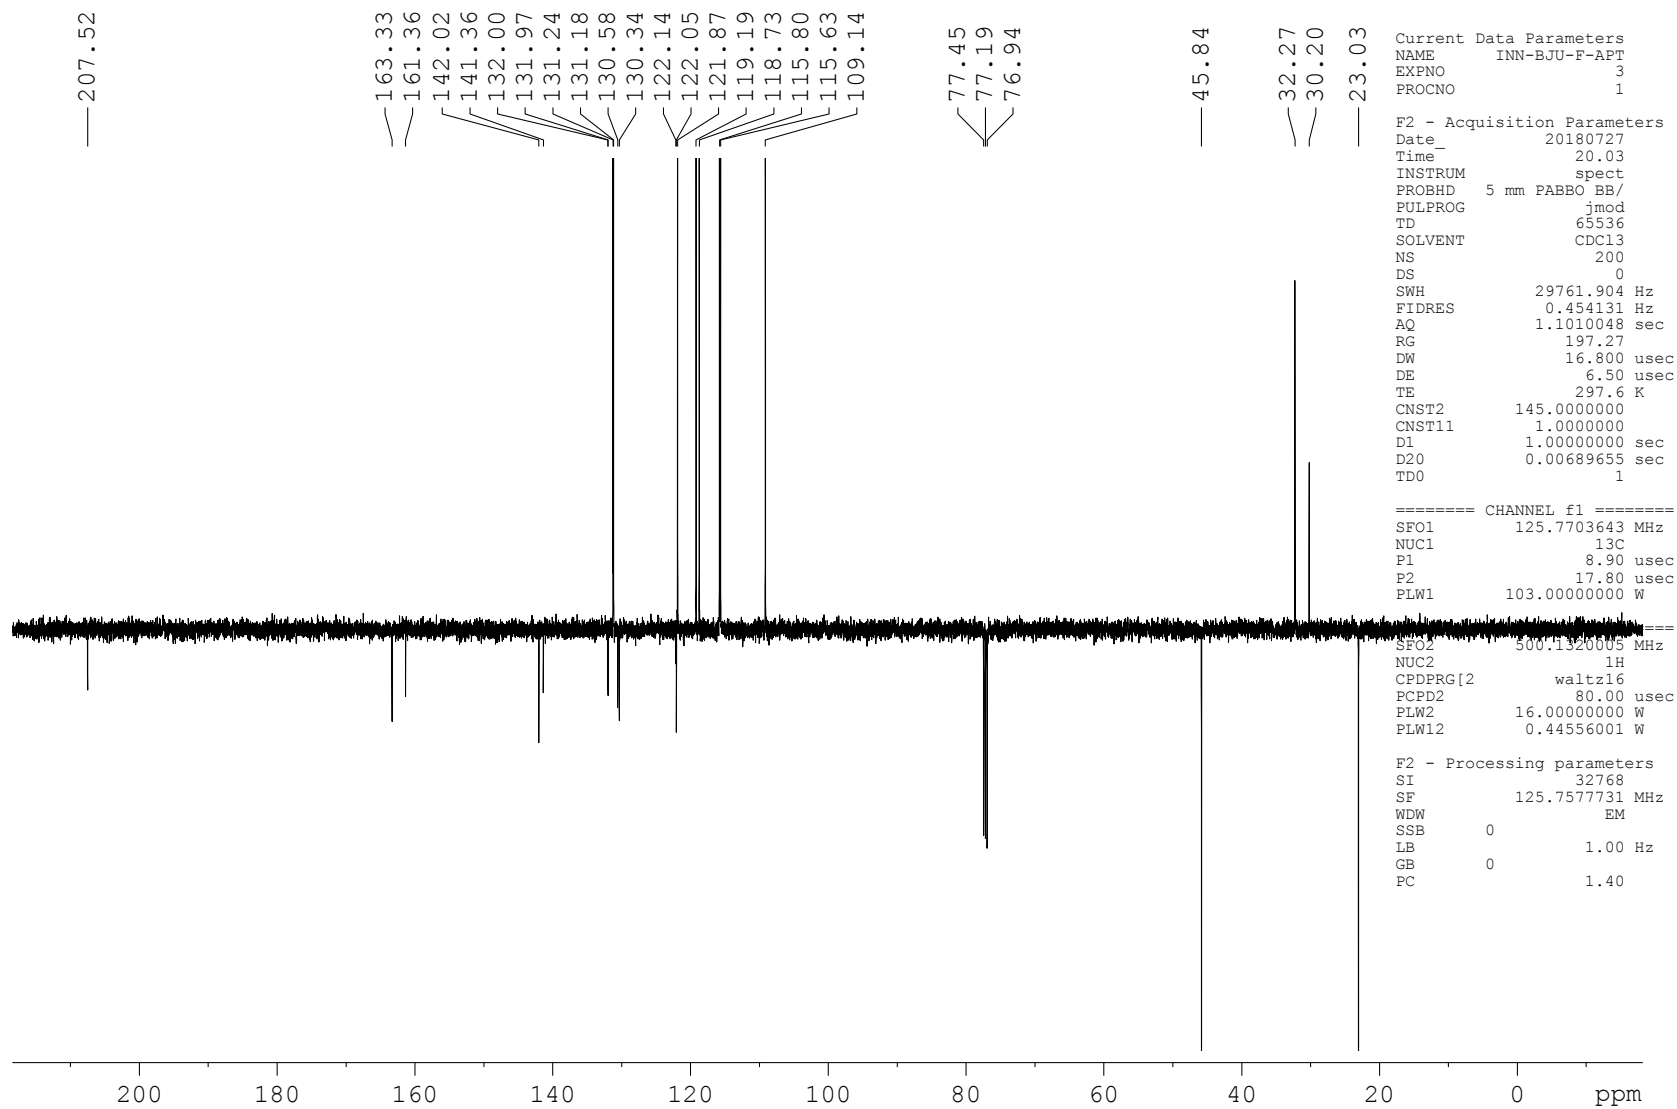

Figure S41. <sup>13</sup>C-APT Spectrum of 6j

NAME INN-MVD-606-19F  
EXPNO 4  
PROCNO 1  
Date\_ 20150822  
Time 21.03  
INSTRUM spect  
PROBHD 5 mm PABBO BB-  
PULPROG zgpg30  
TD 131072  
SOLVENT CDCl3  
NS 16  
DS 4  
SWH 89285.711 Hz  
FIDRES 0.681196 Hz  
AQ 0.7340532 sec  
RG 724  
DW 5.600 usec  
DE 6.50 usec  
TE 296.9 K  
D1 1.0000000 sec  
TDO 1

----- CHANNEL f1 -----  
NUC1 19F  
P1 13.00 usec  
PL1 -3.00 dB  
PL1W 17.04036522 W  
SFO1 376.4607164 MHz  
SI 65536  
SF 376.4983660 MHz  
WDW EM  
SSB 0  
LB 0.30 Hz  
GB 0  
PC 1.00

-114.65

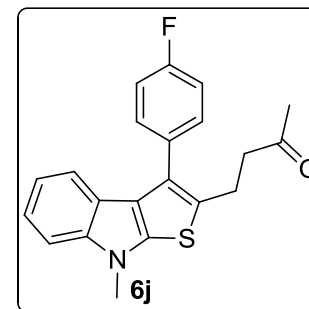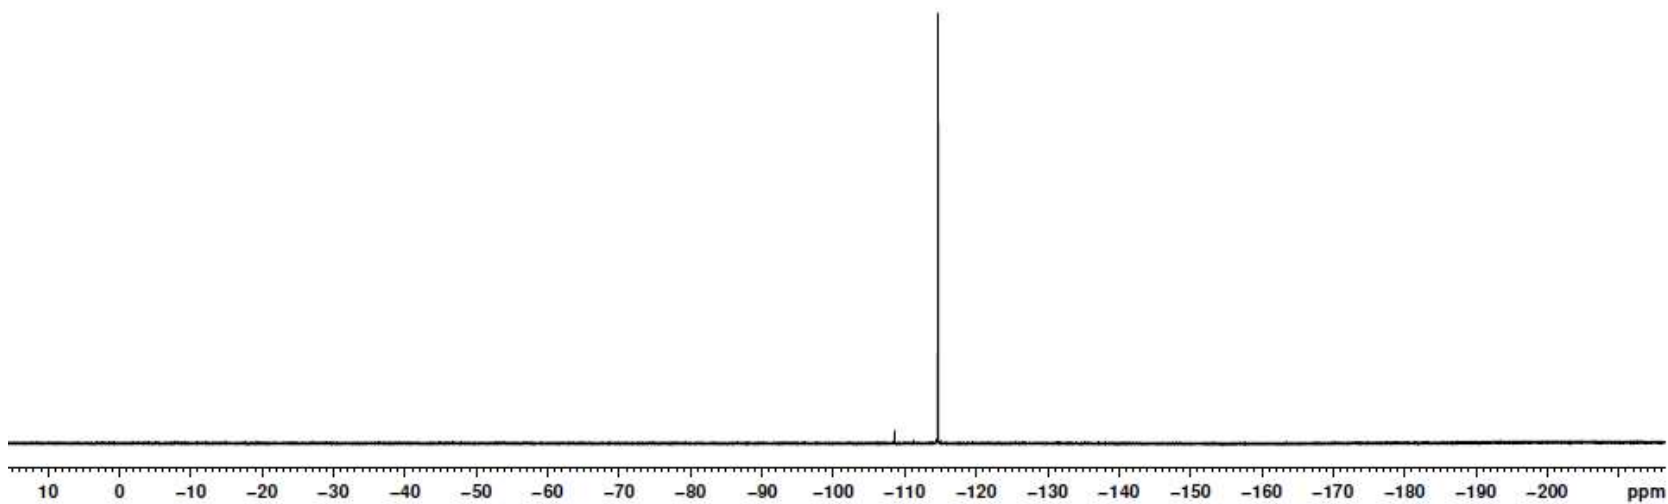

Figure S42. <sup>19</sup>F NMR Spectrum of 6j

Current Data Parameters  
NAME INN-MVD-609-1H  
EXPNO 9  
PROCNO 1

F2 - Acquisition Parameters  
Date\_ 20150821  
Time\_ 18.57  
INSTRUM spect  
PROBHD 5 mm PABBO BB/  
PULPROG zg30  
TD 65536  
SOLVENT CDC13  
NS 20  
DS 2  
SWH 10000.000 Hz  
FIDRES 0.152588 Hz  
AQ 3.2767999 sec  
RG 30.72  
DW 50.000 usec  
DE 6.50 usec  
TE 296.8 K  
D1 1.00000000 sec  
TD0 1

==== CHANNEL f1 =====  
SFO1 500.1330885 MHz  
NUC1 1H  
P1 13.00 usec  
PLW1 13.00000000 W

F2 - Processing parameters  
SI 65536  
SF 500.1300115 MHz  
WDW EM  
SSB 0  
LB 0.30 Hz  
GB 0  
PC 1.00

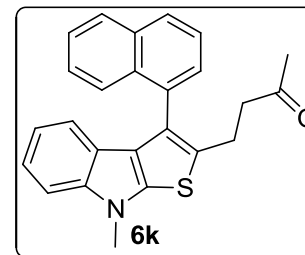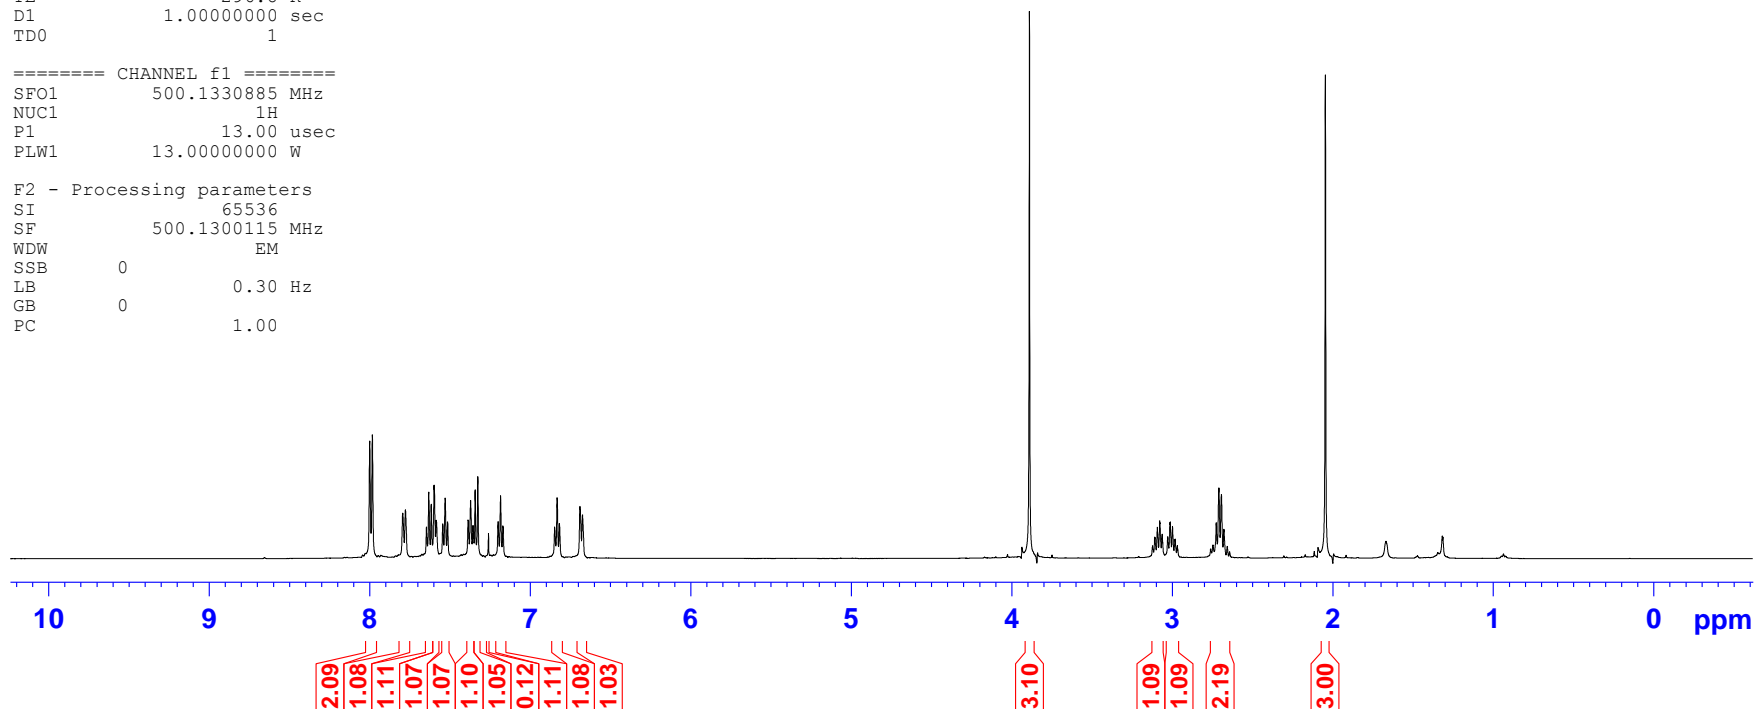

Figure S43. <sup>1</sup>H NMR Spectrum of **6k**

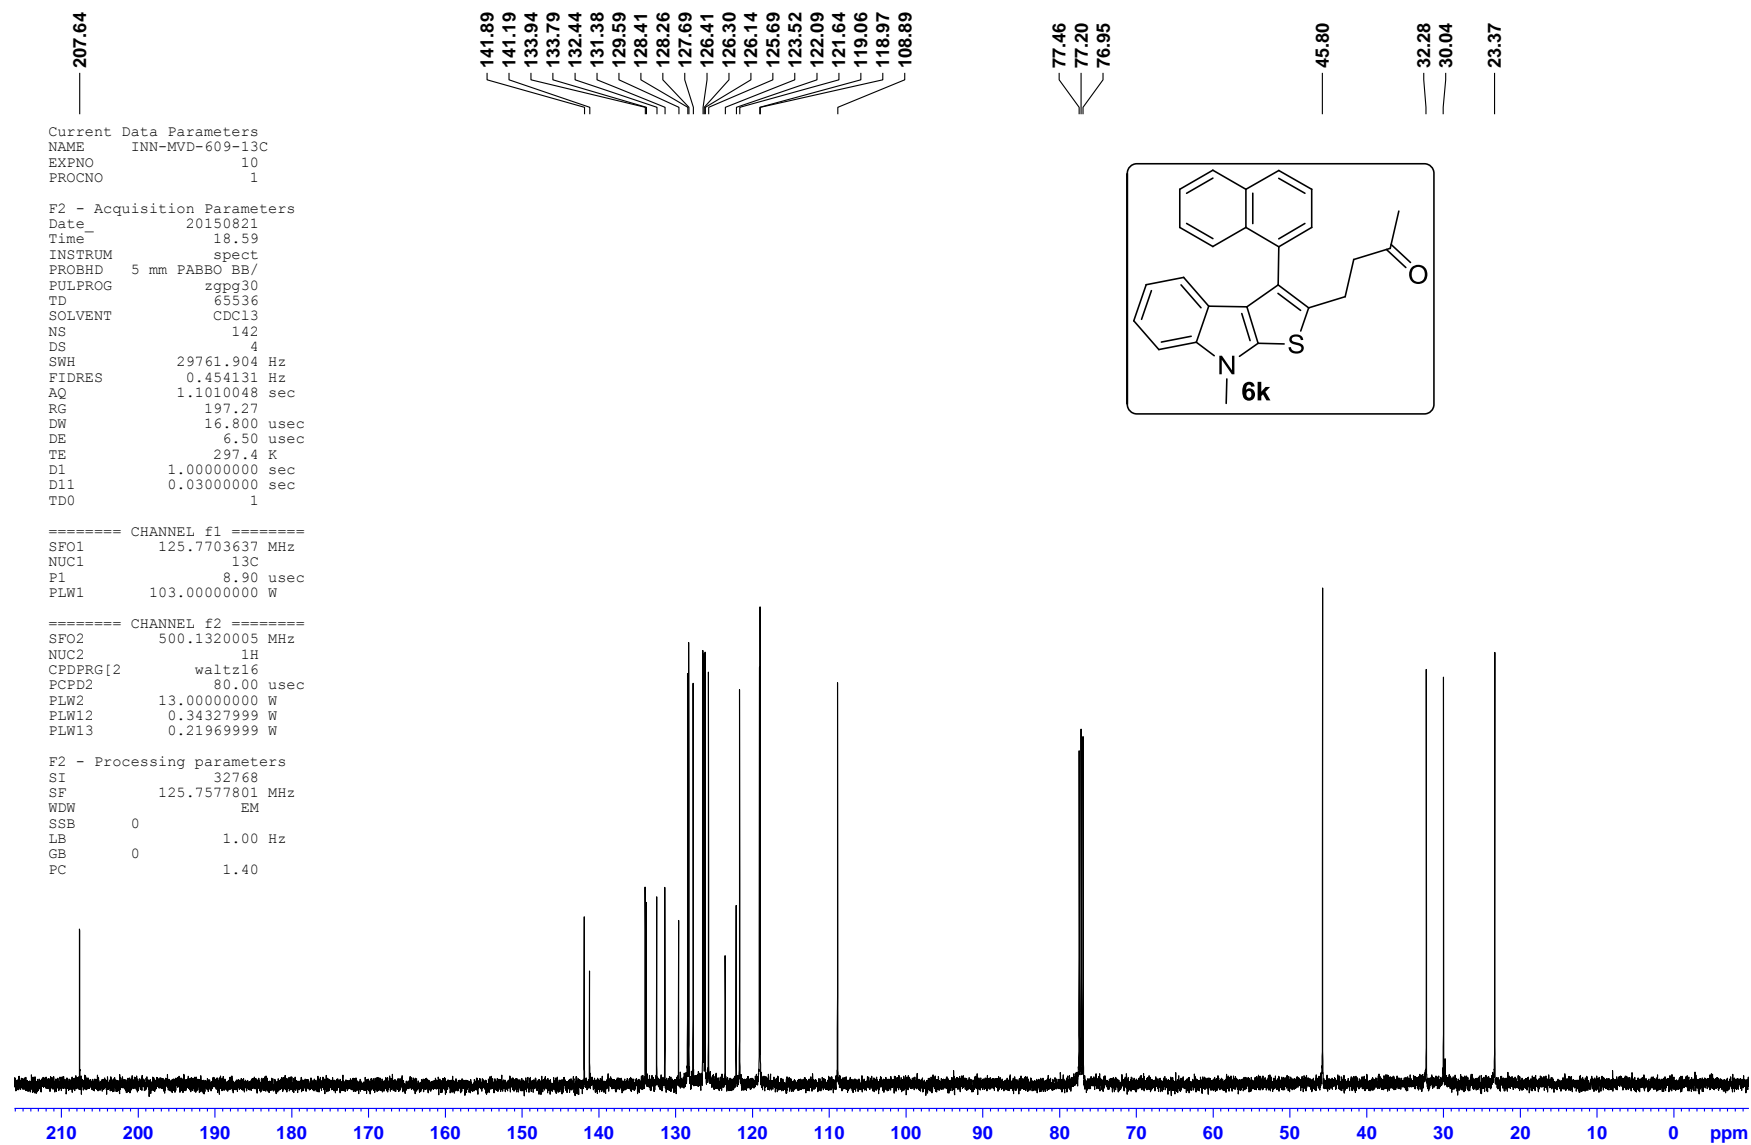

Figure S44.  $^{13}\text{C}$  NMR Spectrum of **6k**

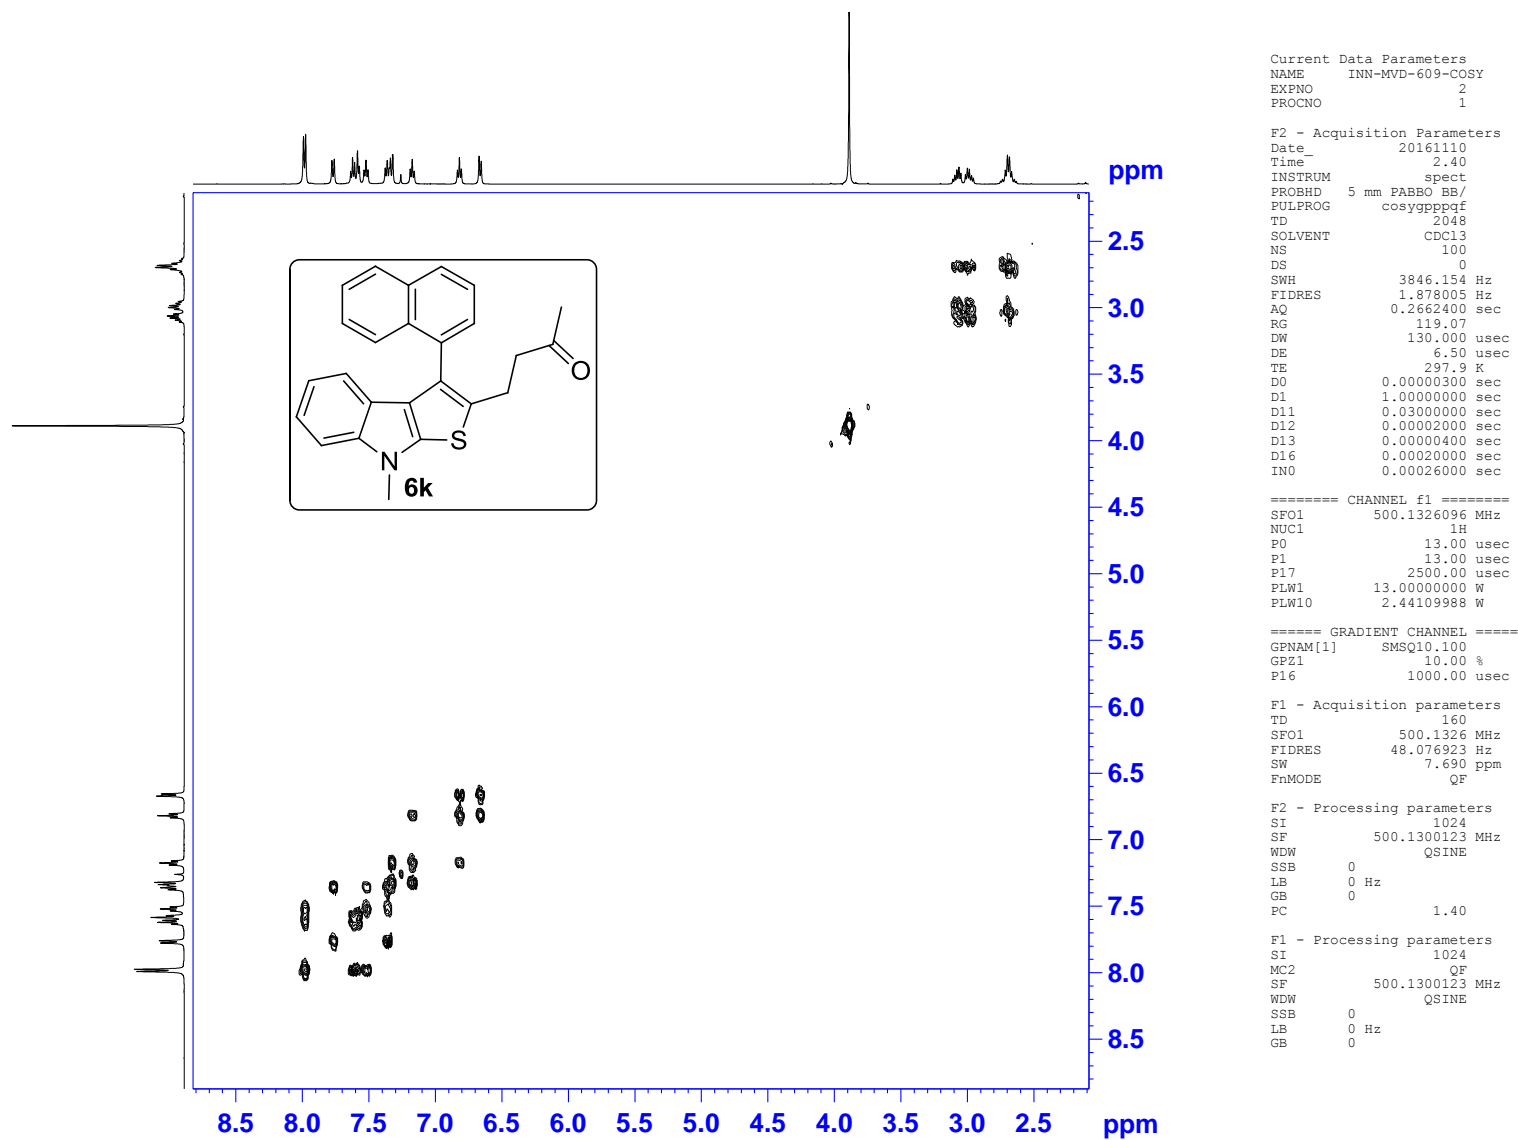

Figure S45.  $^1\text{H}$ - $^1\text{H}$ -COSY Spectrum of **6k**

Current Data Parameters  
NAME INN-MVD-640-1H  
EXPNO 1  
PROCNO 1

F2 - Acquisition Parameters  
Date\_ 20150917  
Time\_ 19.10  
INSTRUM spect  
PROBHD 5 mm PABBO BB/  
PULPROG zg30  
TD 65536  
SOLVENT CDCl3  
NS 25  
DS 2  
SWH 10000.000 Hz  
FIDRES 0.152588 Hz  
AQ 3.2767999 sec  
RG 53.37  
DW 50.000 usec  
DE 6.50 usec  
TE 293.7 K  
D1 1.0000000 sec  
TD0 1

==== CHANNEL f1 =====  
SFO1 500.1330885 MHz  
NUC1 1H  
P1 13.00 usec  
PLW1 13.00000000 W

F2 - Processing parameters  
SI 65536  
SF 500.1300081 MHz  
WDW EM  
SSB 0  
LB 0.30 Hz  
GB 0  
PC 1.00

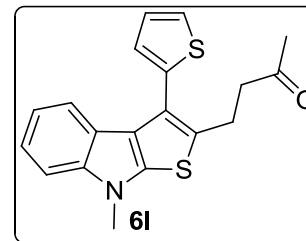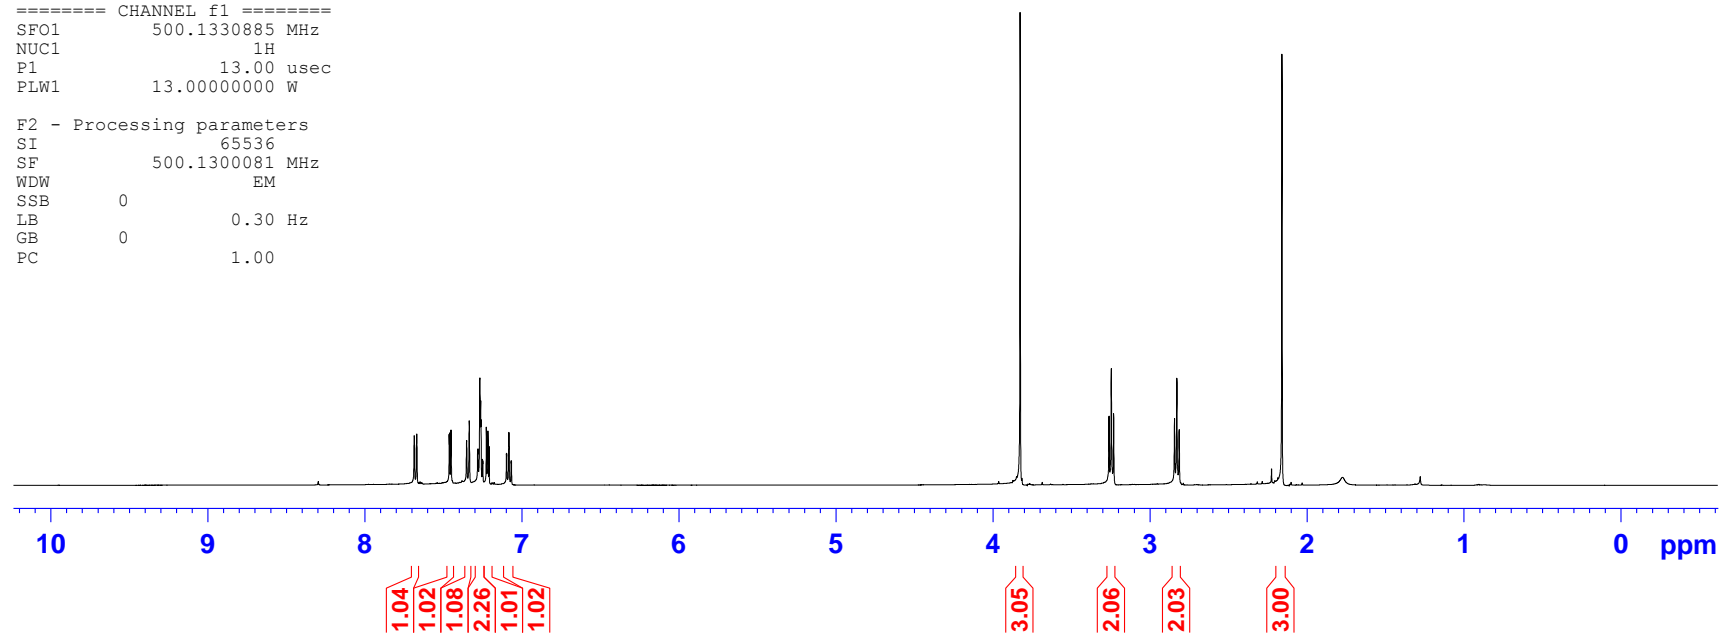

Figure S46. <sup>1</sup>H NMR Spectrum of **61**



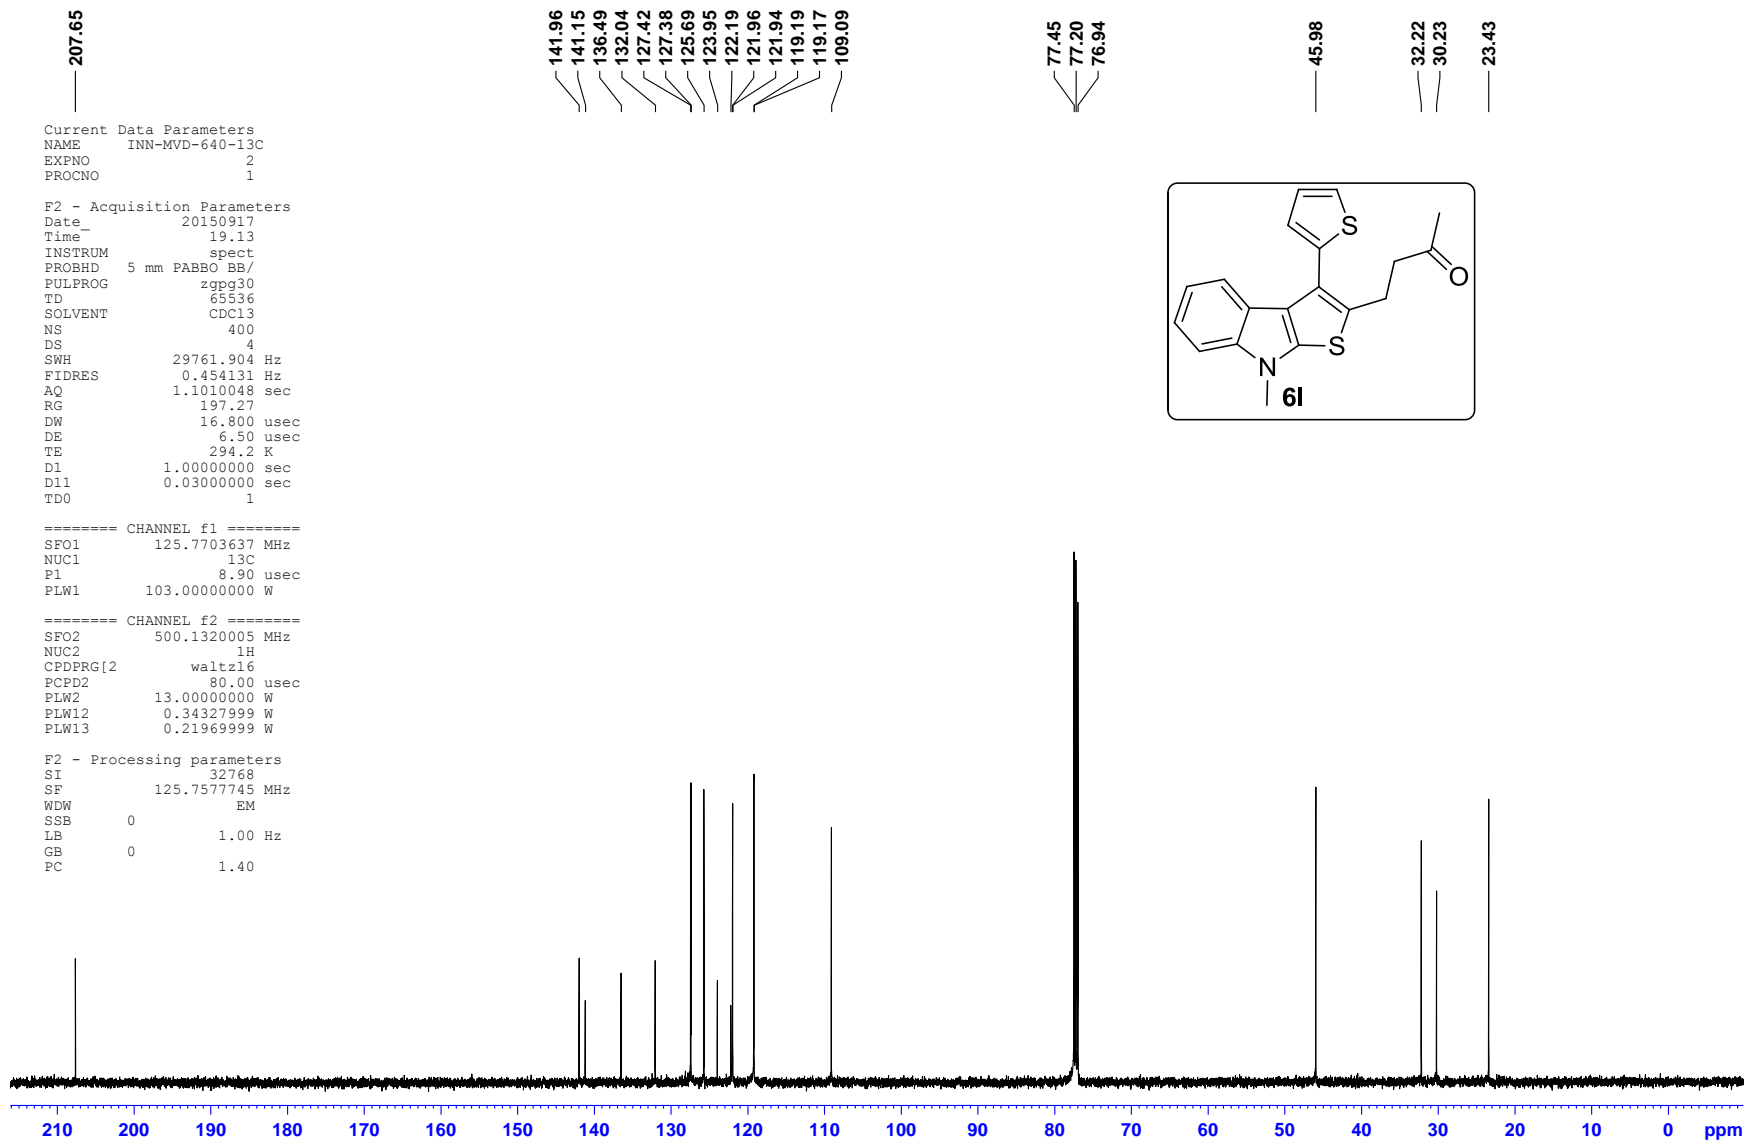

Figure S47.  $^{13}\text{C}$  NMR Spectrum of **6l**

Current Data Parameters  
NAME INN-MVD-661-1H  
EXPNO 13  
PROCNO 1

F2 - Acquisition Parameters  
Date\_ 20151002  
Time\_ 19.32  
INSTRUM spect  
PROBHD 5 mm PABBO BB/  
PULPROG zg30  
TD 65536  
SOLVENT CDC13  
NS 24  
DS 2  
SWH 10000.000 Hz  
FIDRES 0.152588 Hz  
AQ 3.2767999 sec  
RG 80.35  
DW 50.000 usec  
DE 6.50 usec  
TE 295.6 K  
D1 1.00000000 sec  
TD0 1

==== CHANNEL f1 =====  
SFO1 500.1330885 MHz  
NUC1 1H  
P1 13.00 usec  
PLW1 13.00000000 W

F2 - Processing parameters  
SI 65536  
SF 500.1300124 MHz  
WDW EM  
SSB 0  
LB 0.30 Hz  
GB 0  
PC 1.00

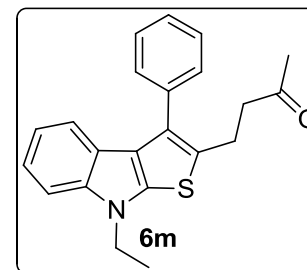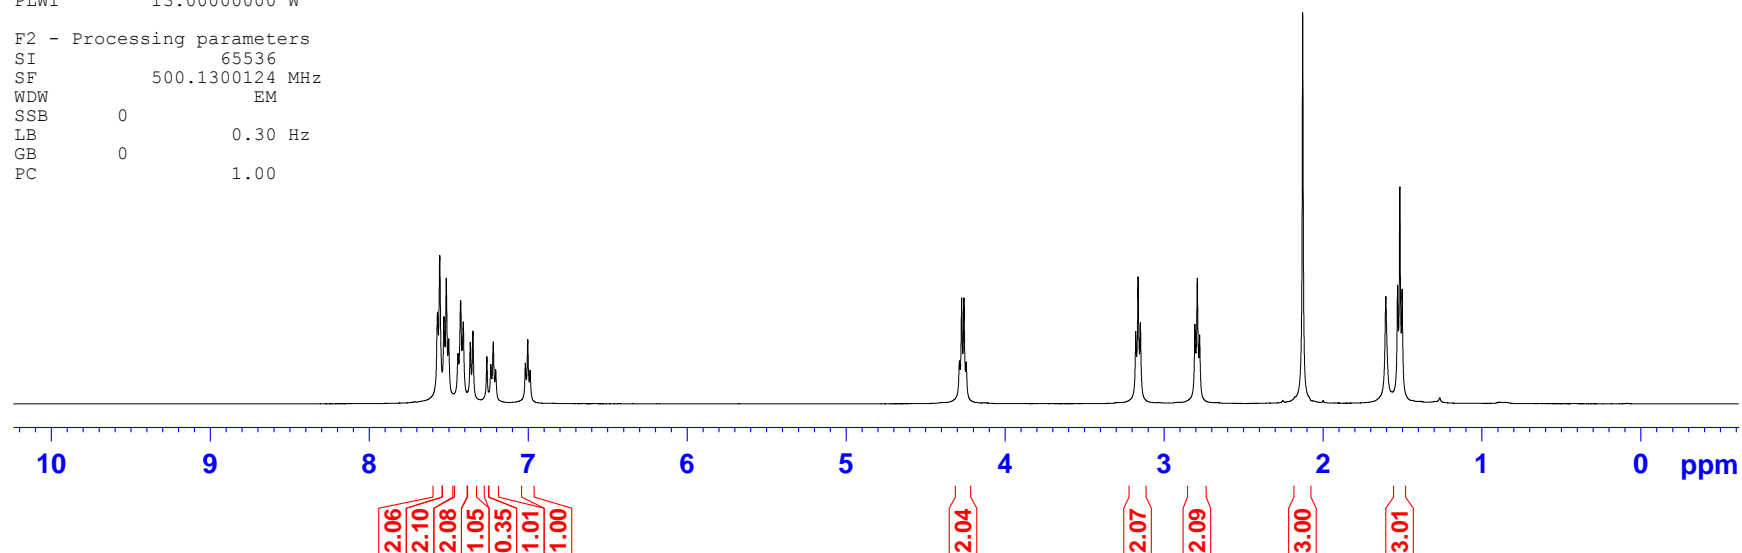

Figure S48. <sup>1</sup>H NMR Spectrum of 6m

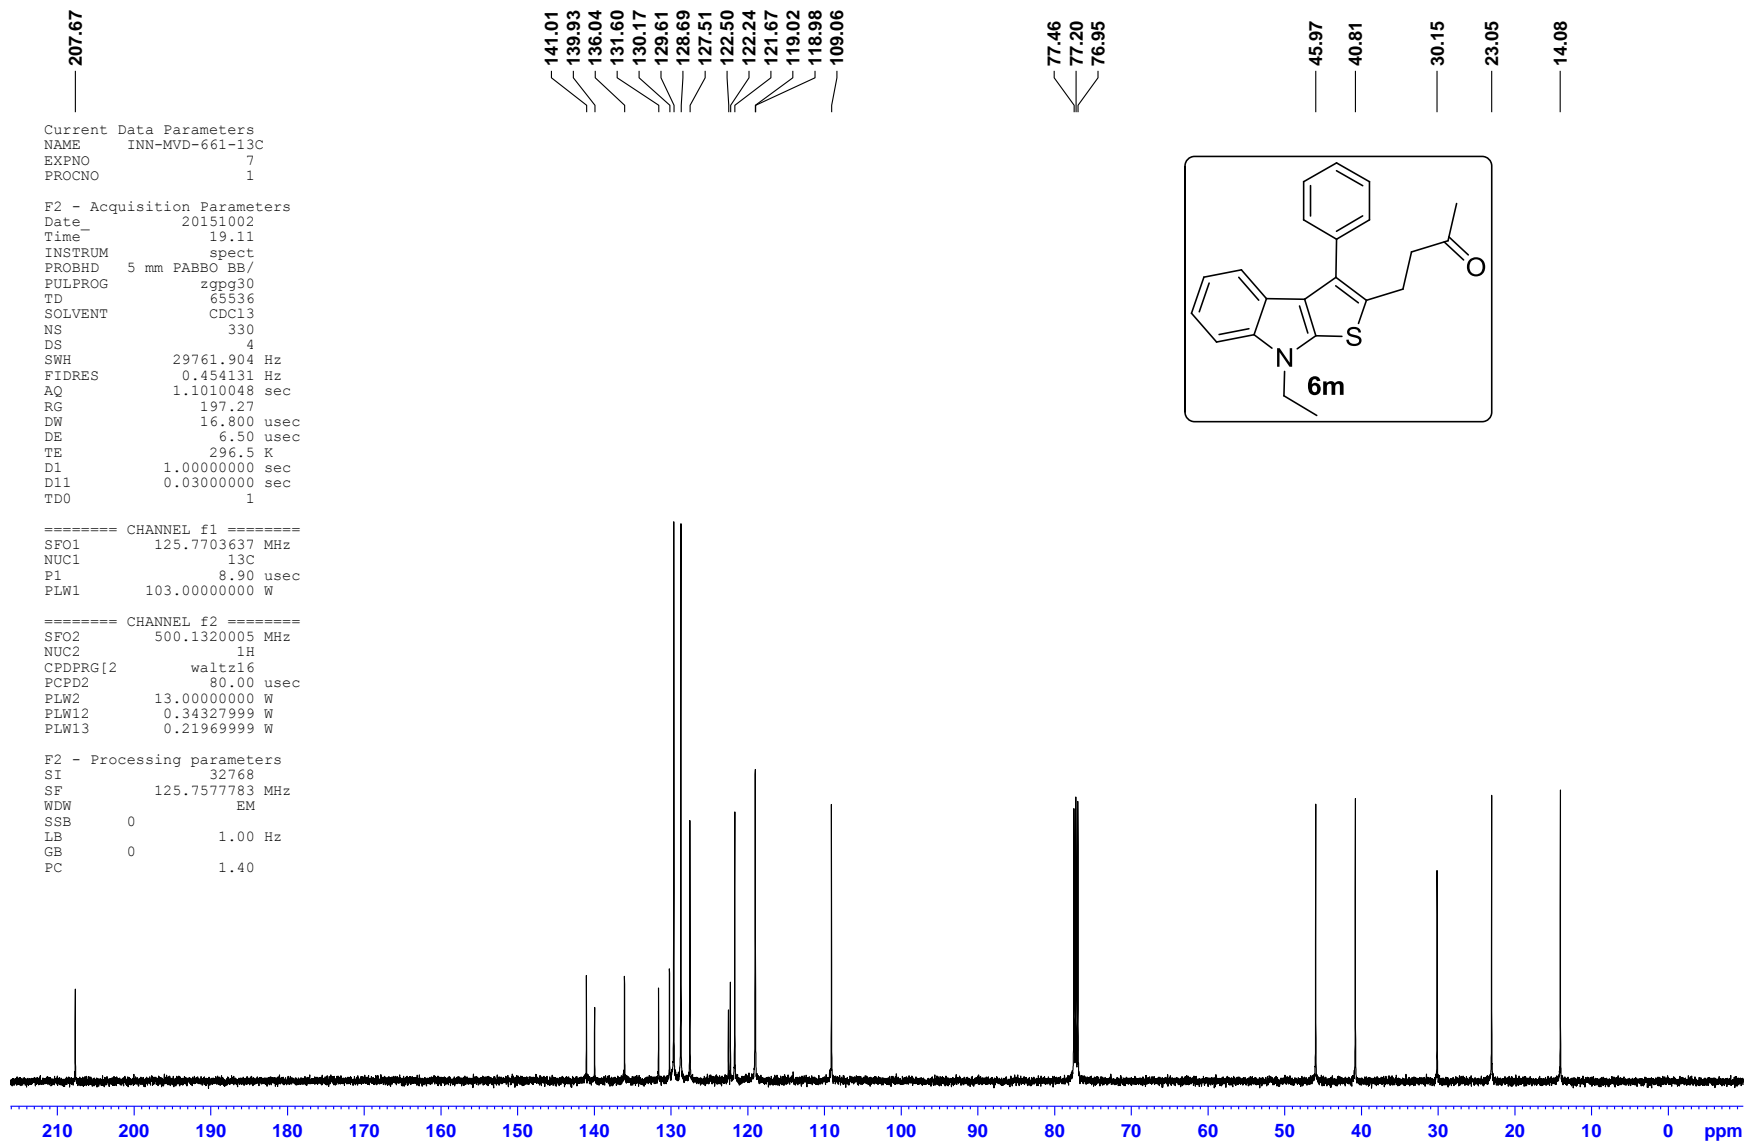

Figure S49.  $^{13}\text{C}$  NMR Spectrum of **6m**

Current Data Parameters  
NAME INN-MVD-662-1H  
EXPNO 4  
PROCNO 1

F2 - Acquisition Parameters  
Date\_ 20151002  
Time\_ 18.29  
INSTRUM spect  
PROBHD 5 mm PABBO BB/  
PULPROG zg30  
TD 65536  
SOLVENT CDC13  
NS 18  
DS 2  
SWH 10000.000 Hz  
FIDRES 0.152588 Hz  
AQ 3.2767999 sec  
RG 30.72  
DW 50.000 usec  
DE 6.50 usec  
TE 295.6 K  
D1 1.00000000 sec  
TD0 1

==== CHANNEL f1 =====  
SFO1 500.1330885 MHz  
NUC1 1H  
P1 13.00 usec  
PLW1 13.00000000 W

F2 - Processing parameters  
SI 65536  
SF 500.1300118 MHz  
WDW EM  
SSB 0  
LB 0.30 Hz  
GB 0  
PC 1.00

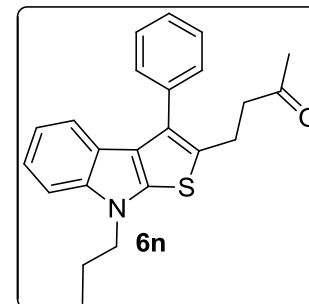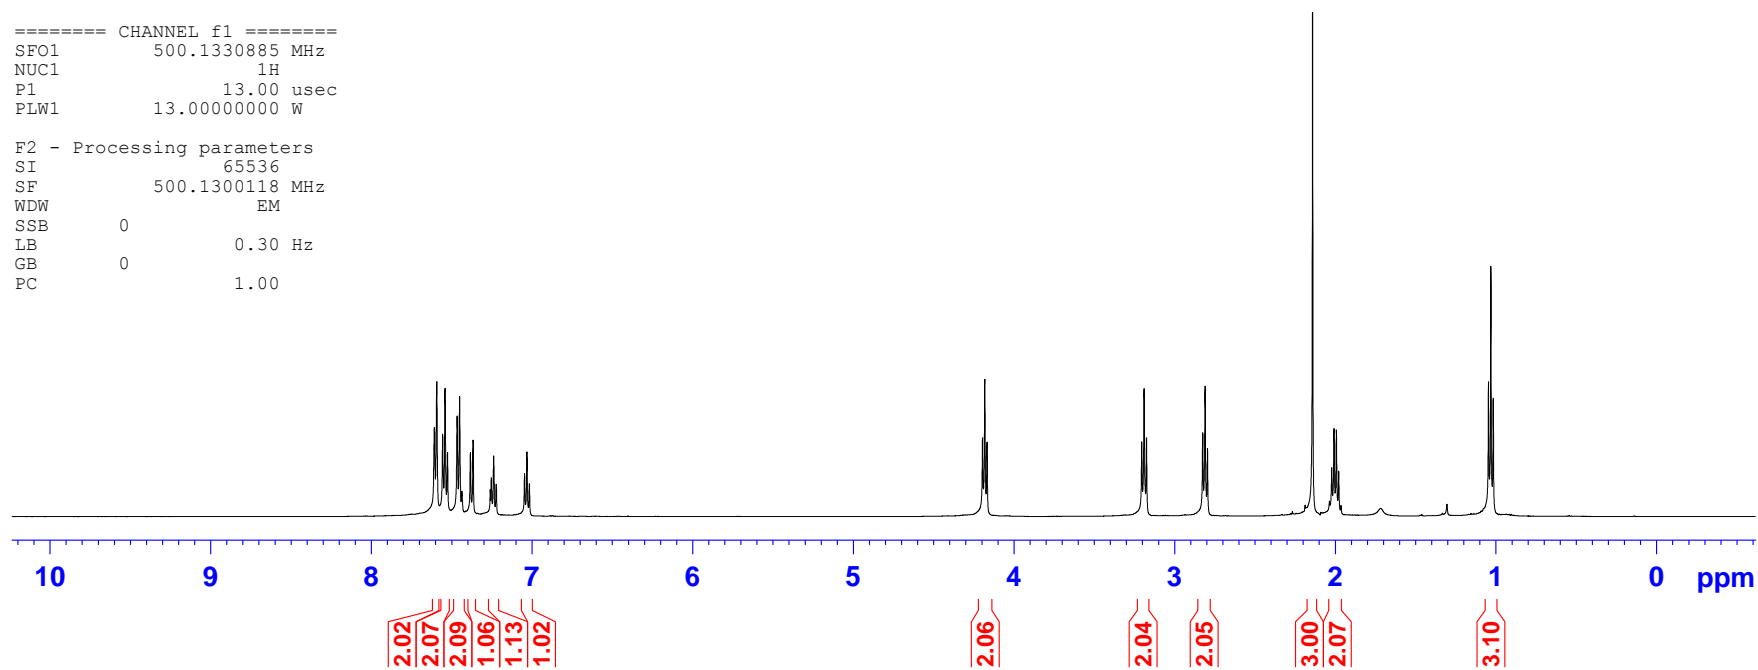

Figure S50. <sup>1</sup>H NMR Spectrum of **6n**

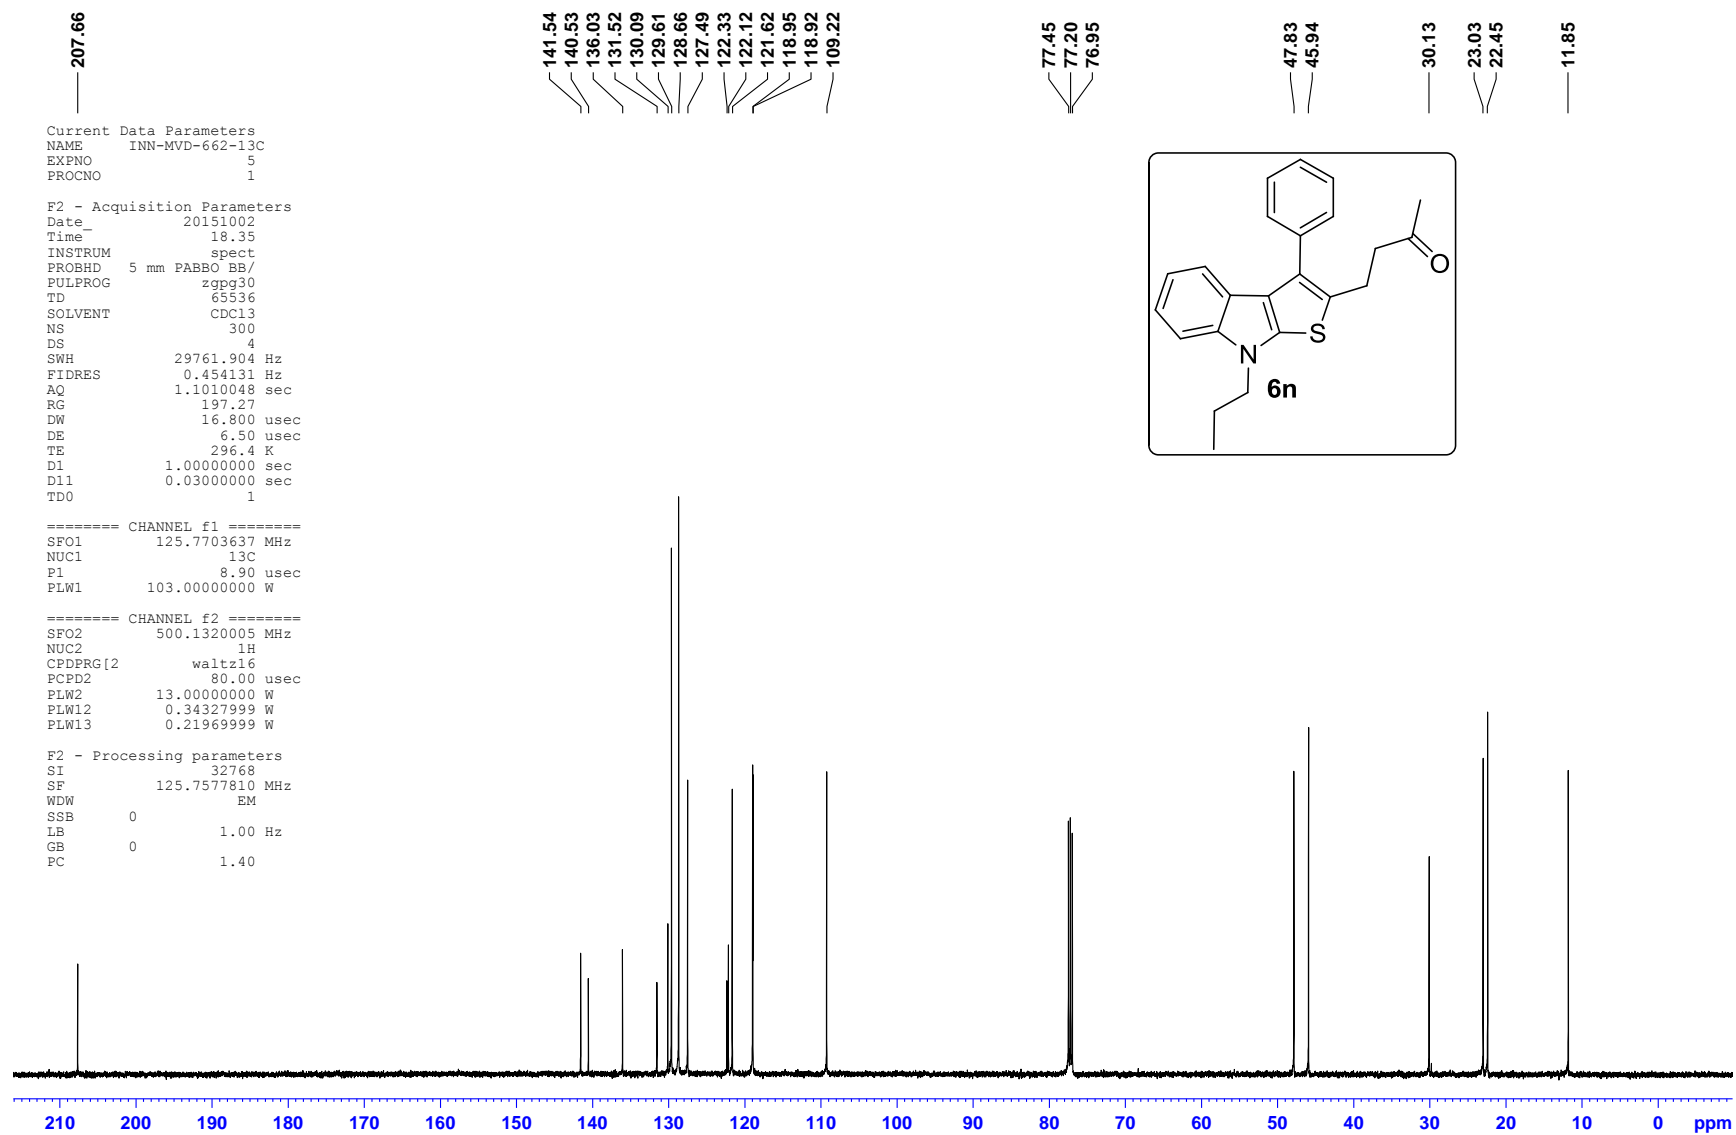

Figure S51.  $^{13}\text{C}$  NMR Spectrum of **6n**

Current Data Parameters  
NAME INN-MVD-660-1H  
EXPNO 6  
PROCNO 1

F2 - Acquisition Parameters  
Date\_ 20151002  
Time\_ 18.46  
INSTRUM spect  
PROBHD 5 mm PABBO BB/  
PULPROG zg30  
TD 65536  
SOLVENT CDC13  
NS 23  
DS 2  
SWH 10000.000 Hz  
FIDRES 0.152588 Hz  
AQ 3.2767999 sec  
RG 30.72  
DW 50.000 usec  
DE 6.50 usec  
TE 295.6 K  
D1 1.00000000 sec  
TD0 1

==== CHANNEL f1 =====  
SFO1 500.1330885 MHz  
NUC1 1H  
P1 13.00 usec  
PLW1 13.00000000 W

F2 - Processing parameters  
SI 65536  
SF 500.1300117 MHz  
WDW EM  
SSB 0  
LB 0.30 Hz  
GB 0  
PC 1.00

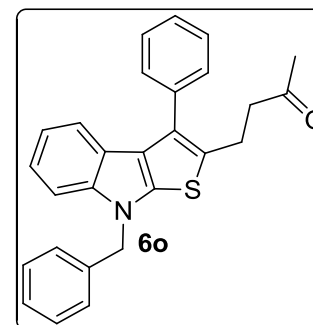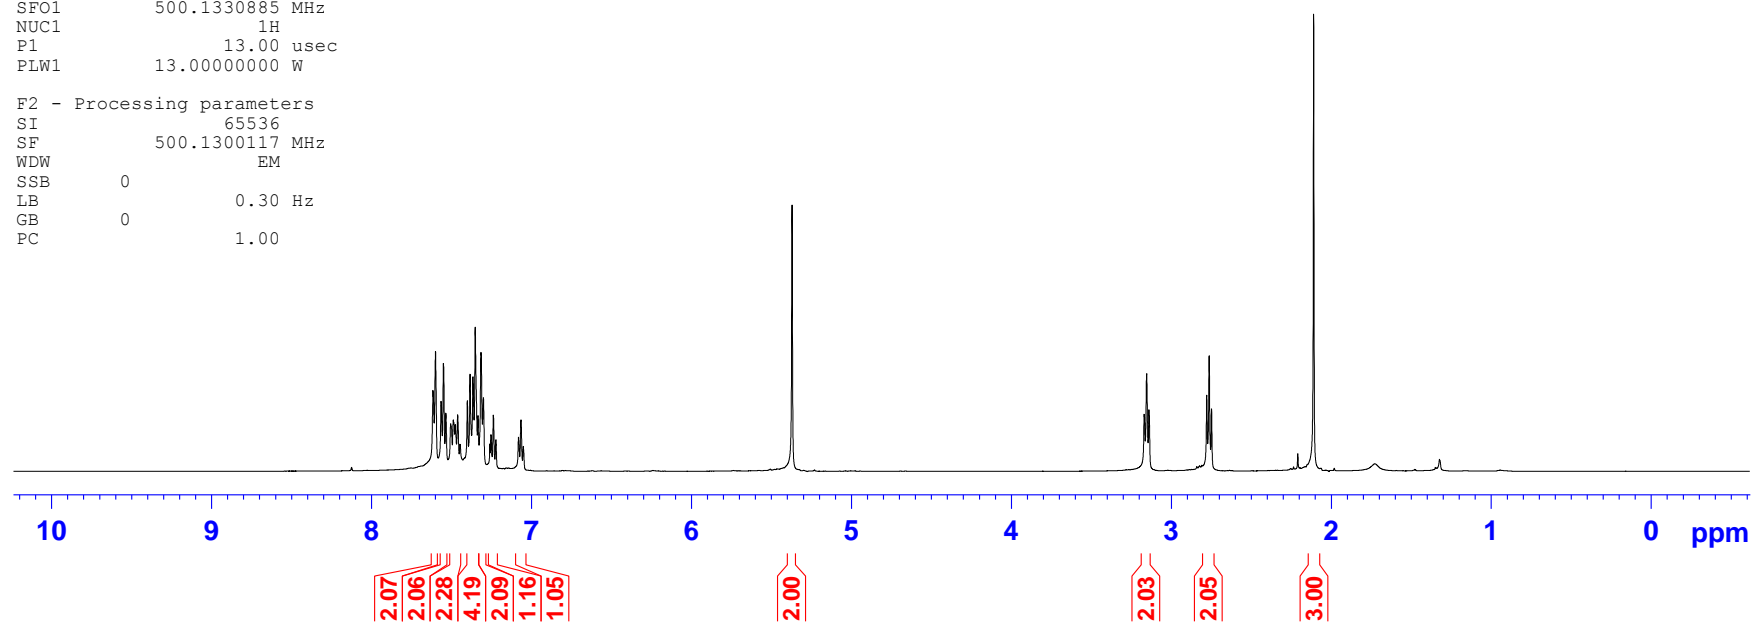

Figure S52. <sup>1</sup>H NMR Spectrum of **60**

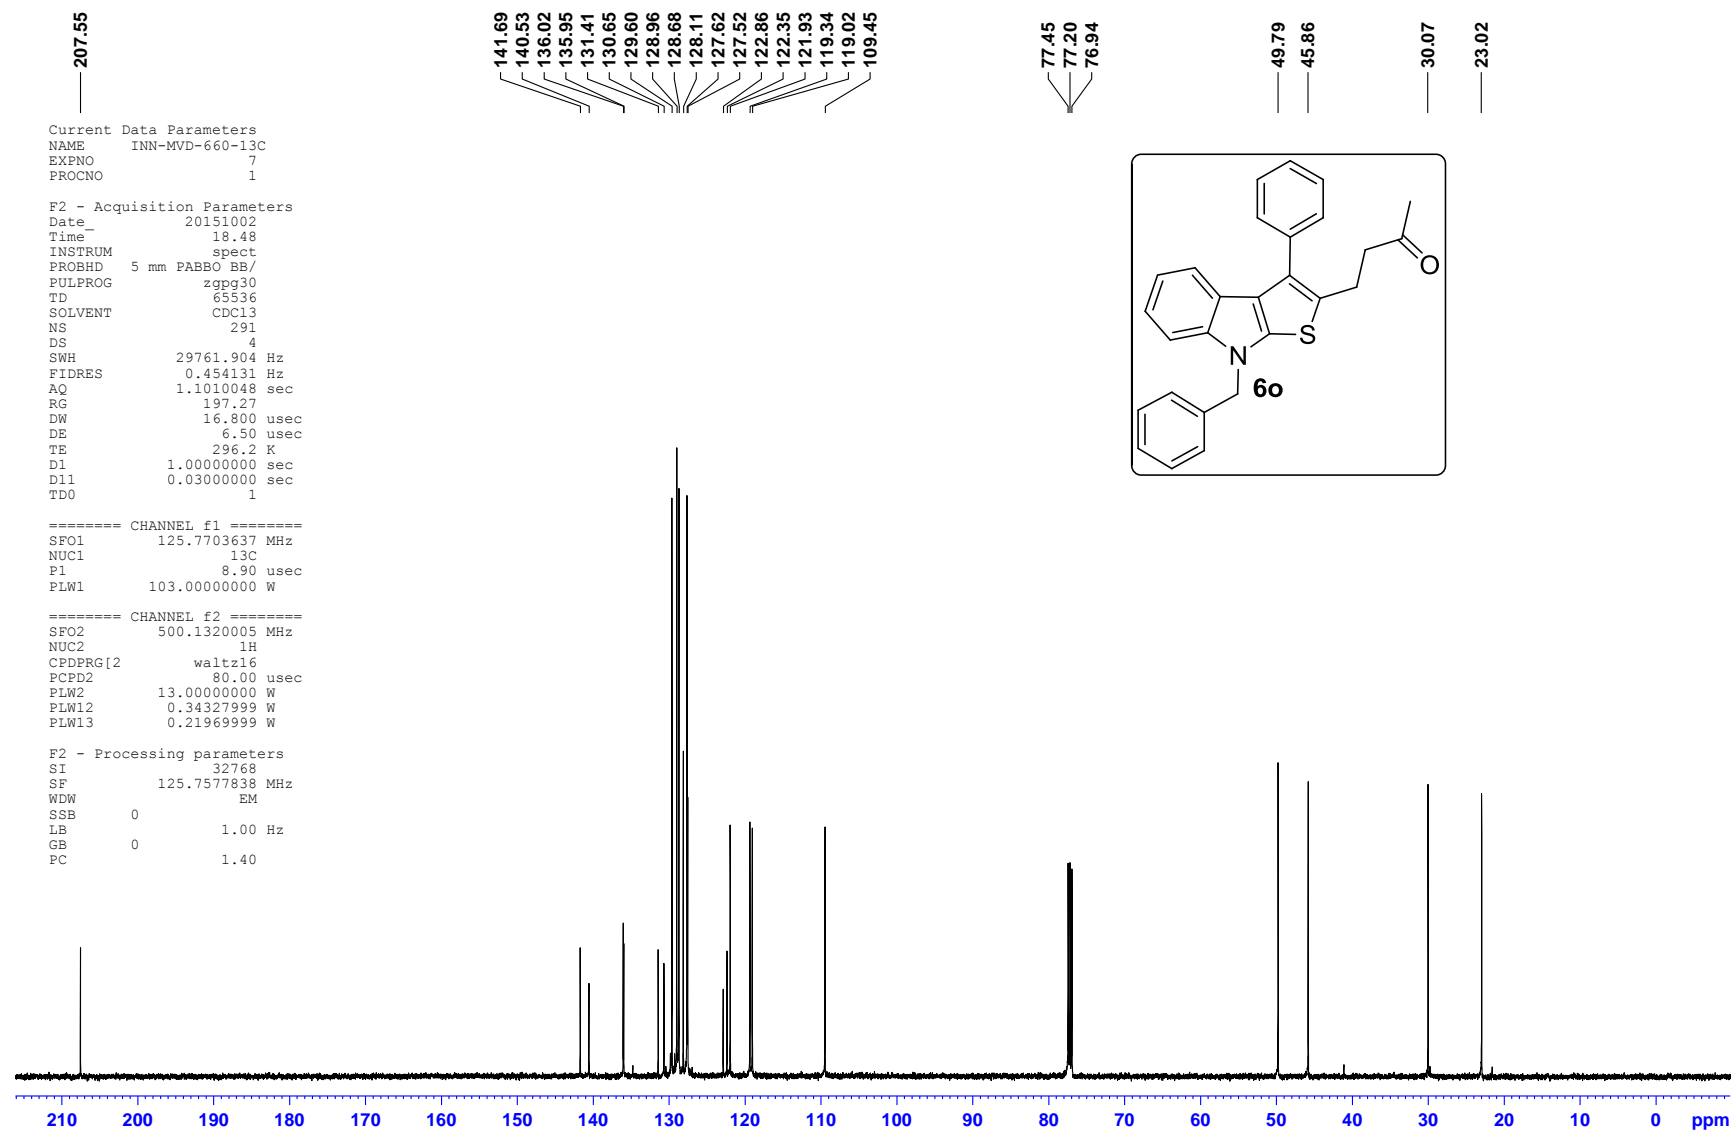

Figure S53.  $^{13}\text{C}$  NMR Spectrum of **6o**

Current Data Parameters  
NAME INN-MVD-675-1H  
EXPNO 1  
PROCNO 1

F2 - Acquisition Parameters  
Date\_ 20151106  
Time\_ 13.34  
INSTRUM spect  
PROBHD 5 mm PABBO BB/  
PULPROG zg30  
TD 65536  
SOLVENT CDCl3  
NS 25  
DS 2  
SWH 10000.000 Hz  
FIDRES 0.152588 Hz  
AQ 3.2767999 sec  
RG 48.36  
DW 50.000 usec  
DE 6.50 usec  
TE 295.6 K  
D1 1.00000000 sec  
TD0 1

==== CHANNEL f1 =====  
SFO1 500.1330885 MHz  
NUC1 1H  
P1 13.00 usec  
PLW1 13.00000000 W

F2 - Processing parameters  
SI 65536  
SF 500.1300119 MHz  
WDW EM  
SSB 0  
LB 0.30 Hz  
GB 0  
PC 1.00

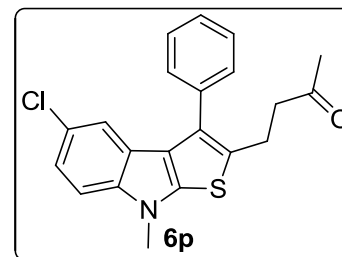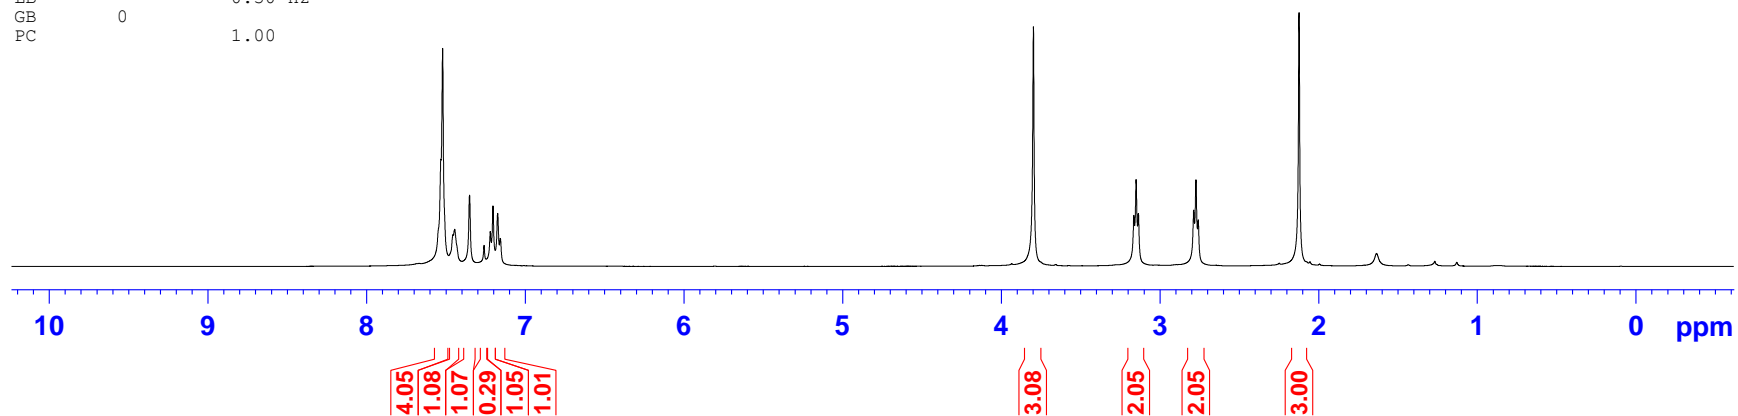

Figure S54. <sup>1</sup>H NMR Spectrum of 6p



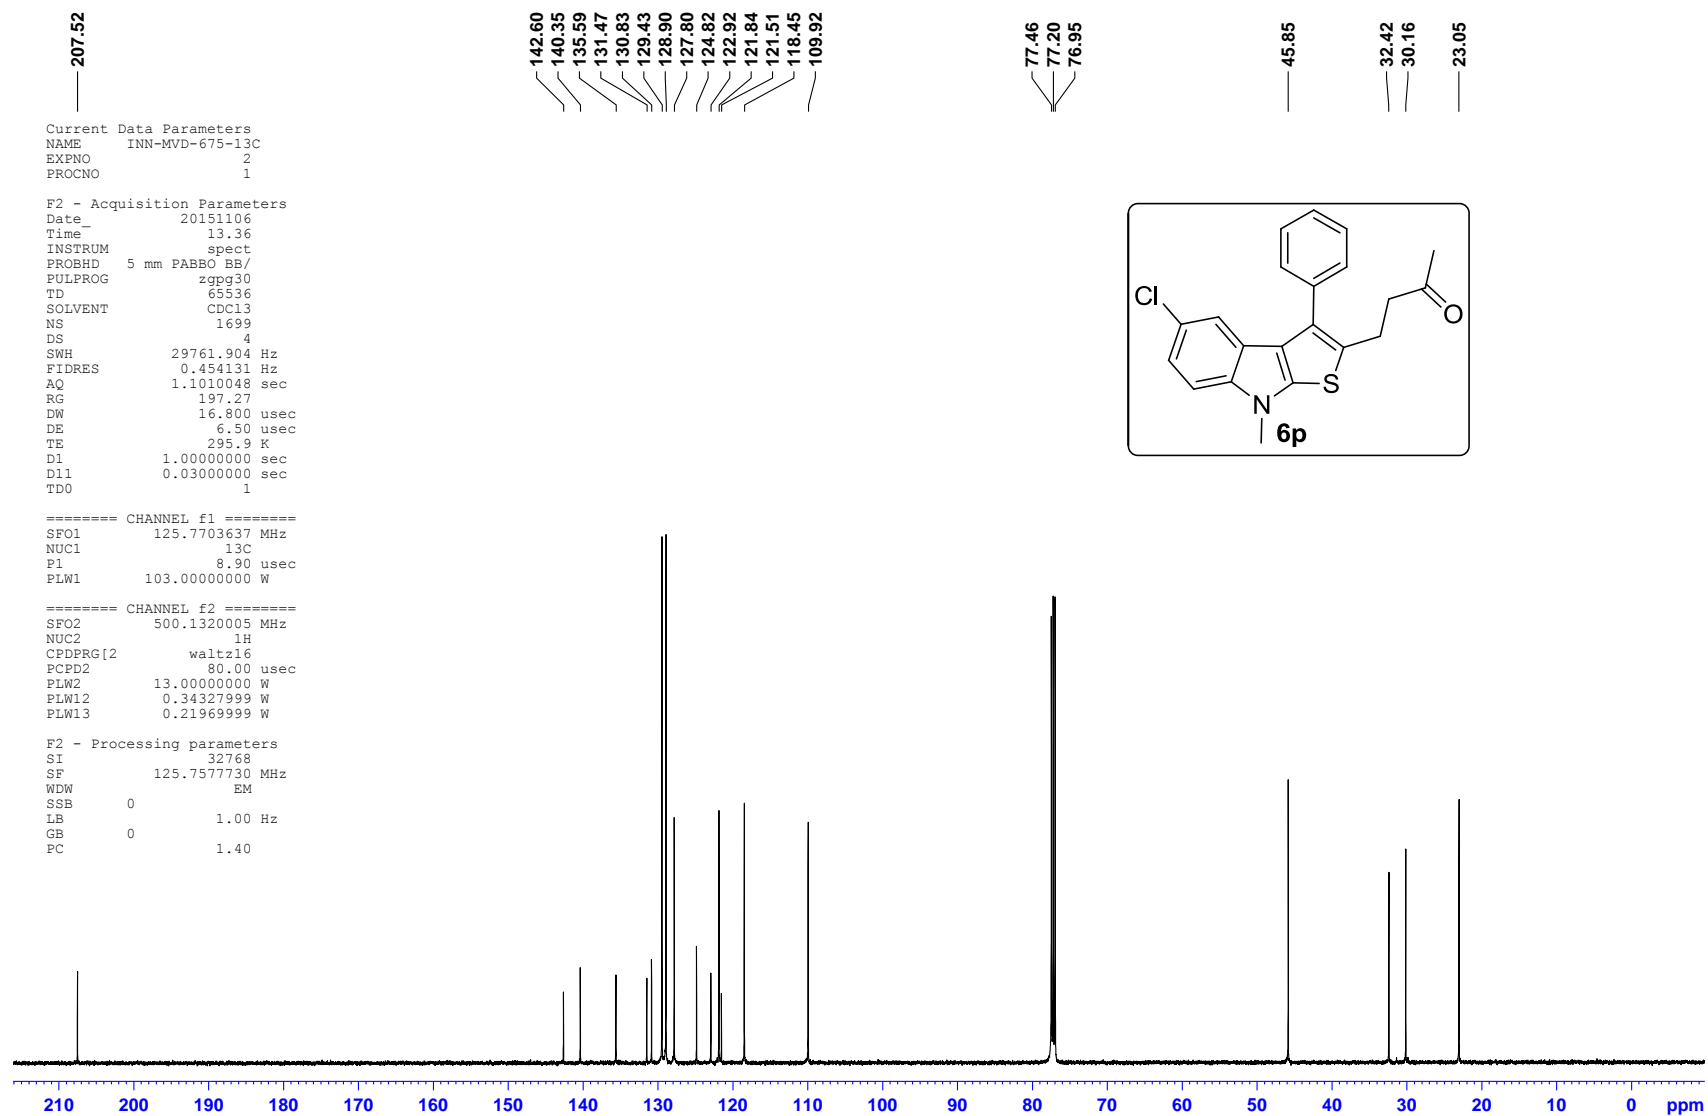

Figure S55.  $^{13}\text{C}$  NMR Spectrum of **6p**

Current Data Parameters  
NAME INN-MVD-903-1H  
EXPNO 1  
PROCNO 1

F2 - Acquisition Parameters  
Date\_ 20161015  
Time 3.40  
INSTRUM spect  
PROBHD 5 mm SEI 1H/D-  
PULPROG zg30  
TD 54274  
SOLVENT CDCl3  
NS 13  
DS 0  
SWH 8223.685 Hz  
FIDRES 0.151522 Hz  
AQ 3.2998593 sec  
RG 22.6  
DW 60.800 usec  
DE 6.50 usec  
TE 295.3 K  
D1 1.00000000 sec  
TD0 1

==== CHANNEL f1 =====  
NUC1 1H  
P1 14.75 usec  
PL1 -1.00 dB  
PL1W 10.56200695 W  
SFO1 400.1324710 MHz

F2 - Processing parameters  
SI 32768  
SF 400.1300103 MHz  
WDW EM  
SSB 0  
LB 0.30 Hz  
GB 0  
PC 1.00

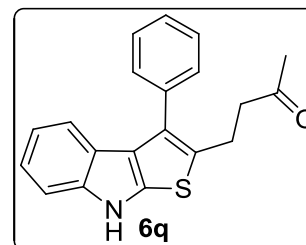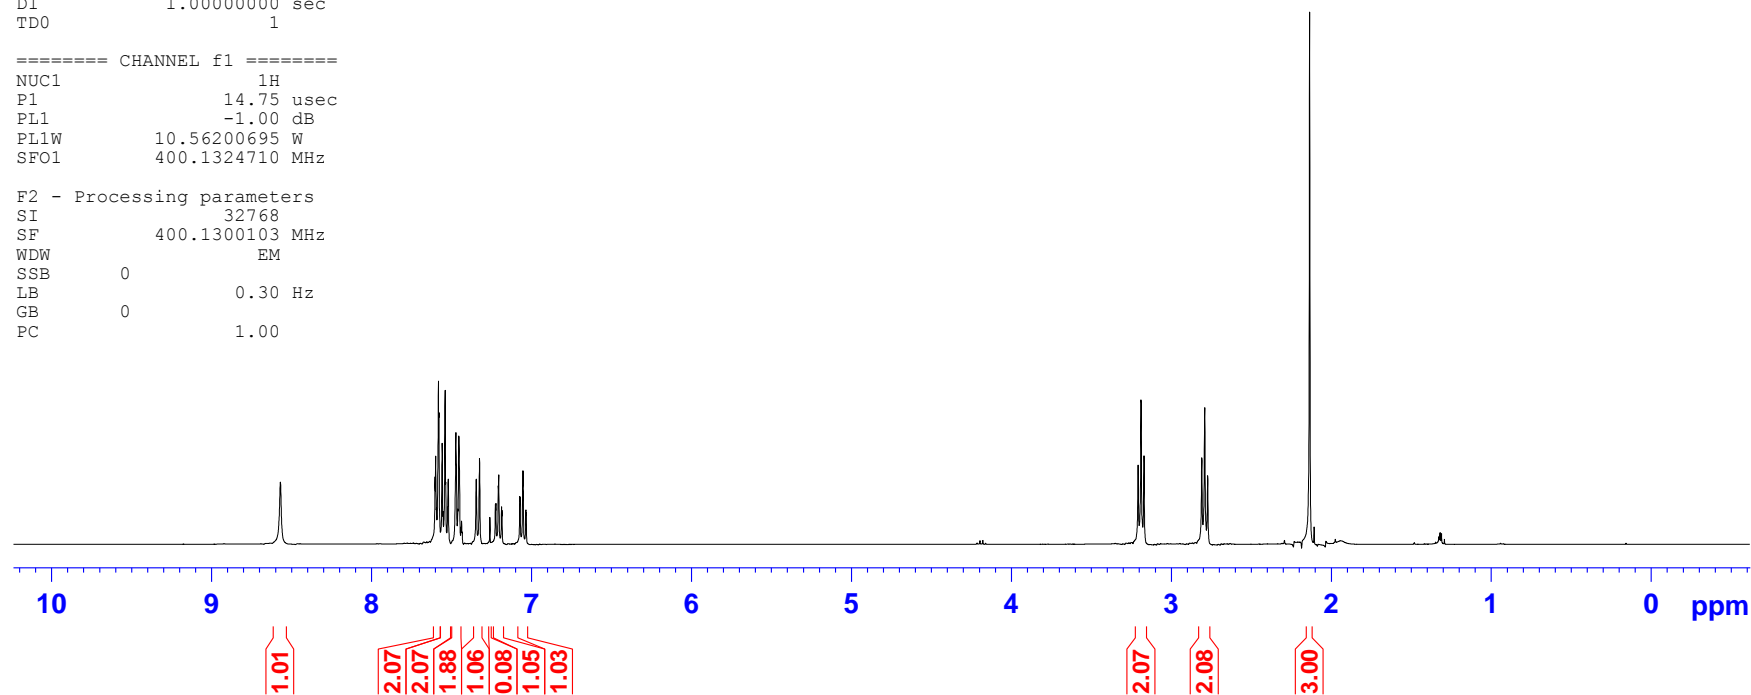

Figure S56. <sup>1</sup>H NMR Spectrum of **6q**

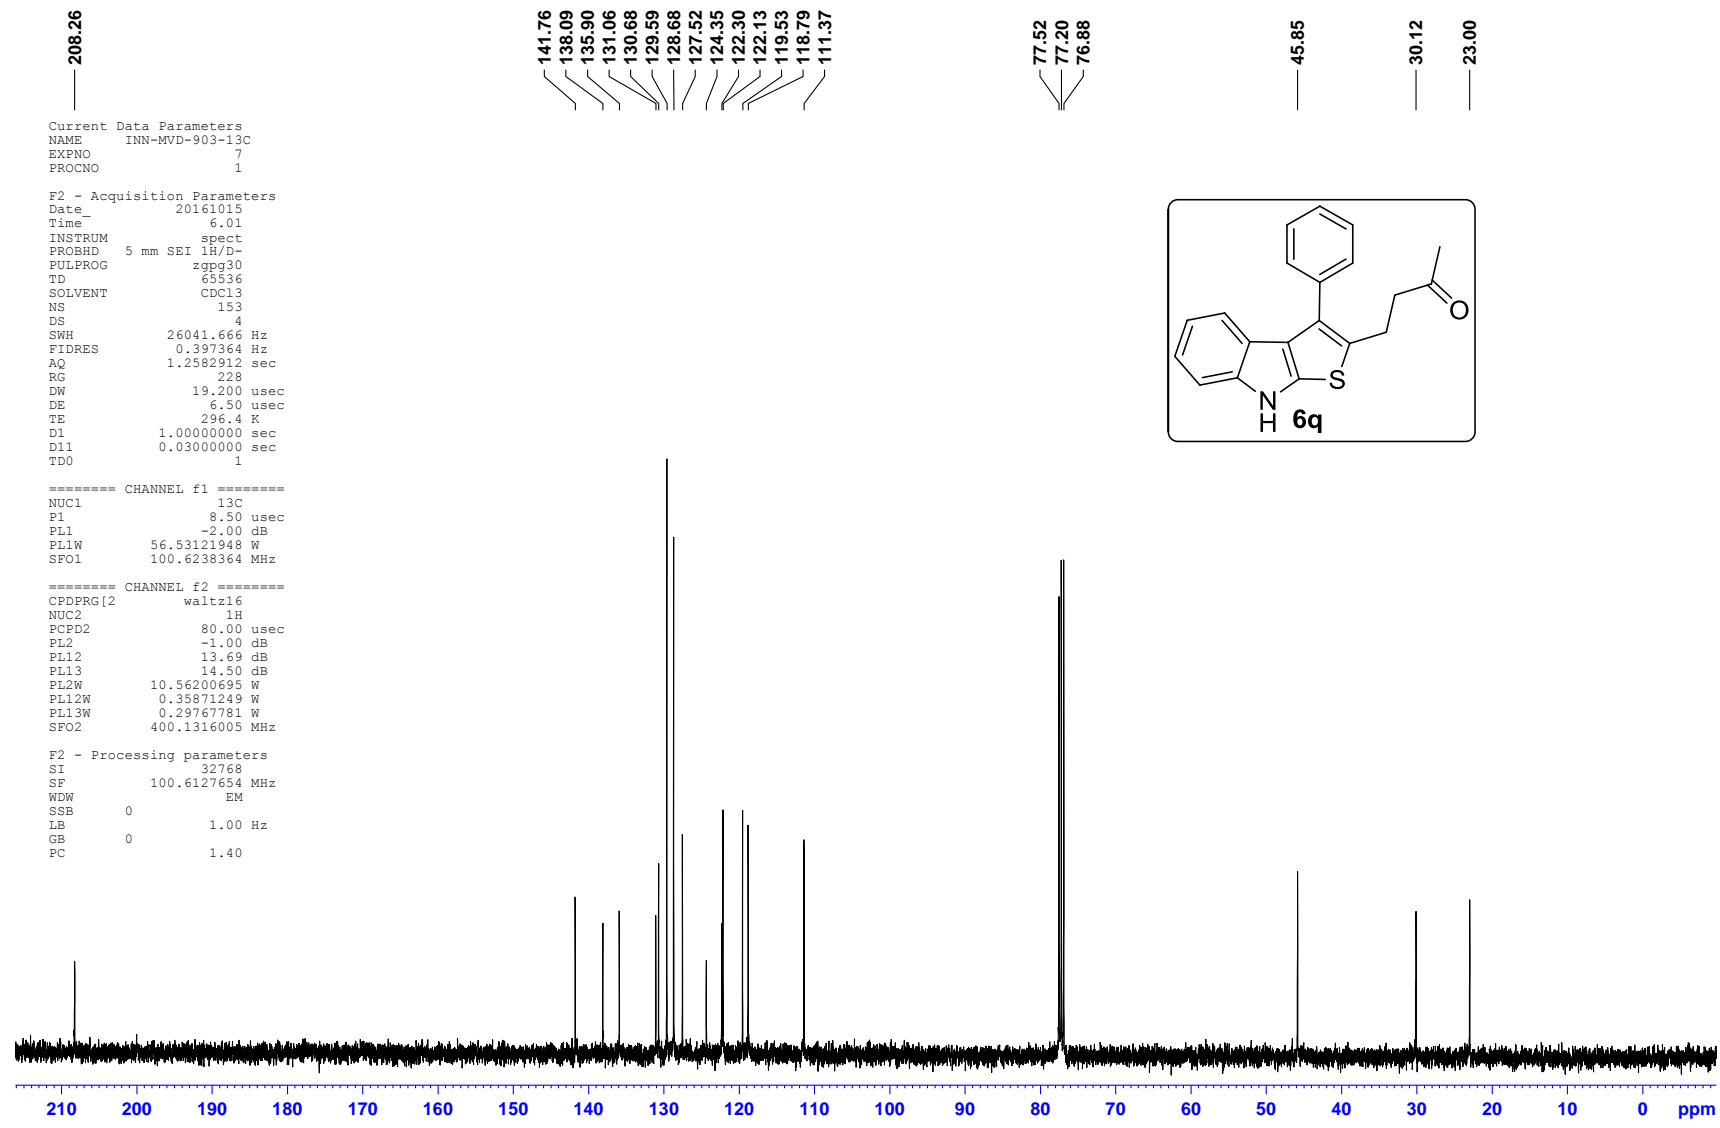

Figure S57. <sup>13</sup>C NMR Spectrum of **6q**

Current Data Parameters  
NAME INN-MVD-889-1H  
EXPNO 6  
PROCNO 1

F2 - Acquisition Parameters  
Date\_ 20161003  
Time 16.11  
INSTRUM spect  
PROBHD 5 mm PABBO BB/  
PULPROG zg30  
TD 65536  
SOLVENT CDC13  
NS 11  
DS 2  
SWH 10000.000 Hz  
FIDRES 0.152588 Hz  
AQ 3.2767999 sec  
RG 106.54  
DW 50.000 usec  
DE 6.50 usec  
TE 297.5 K  
D1 1.00000000 sec  
TD0 1

==== CHANNEL f1 =====  
SFO1 500.1330885 MHz  
NUC1 1H  
P1 13.00 usec  
PLW1 13.00000000 W

F2 - Processing parameters  
SI 65536  
SF 500.1300151 MHz  
WDW EM  
SSB 0  
LB 0.30 Hz  
GB 0  
PC 1.00

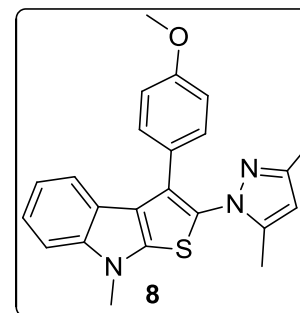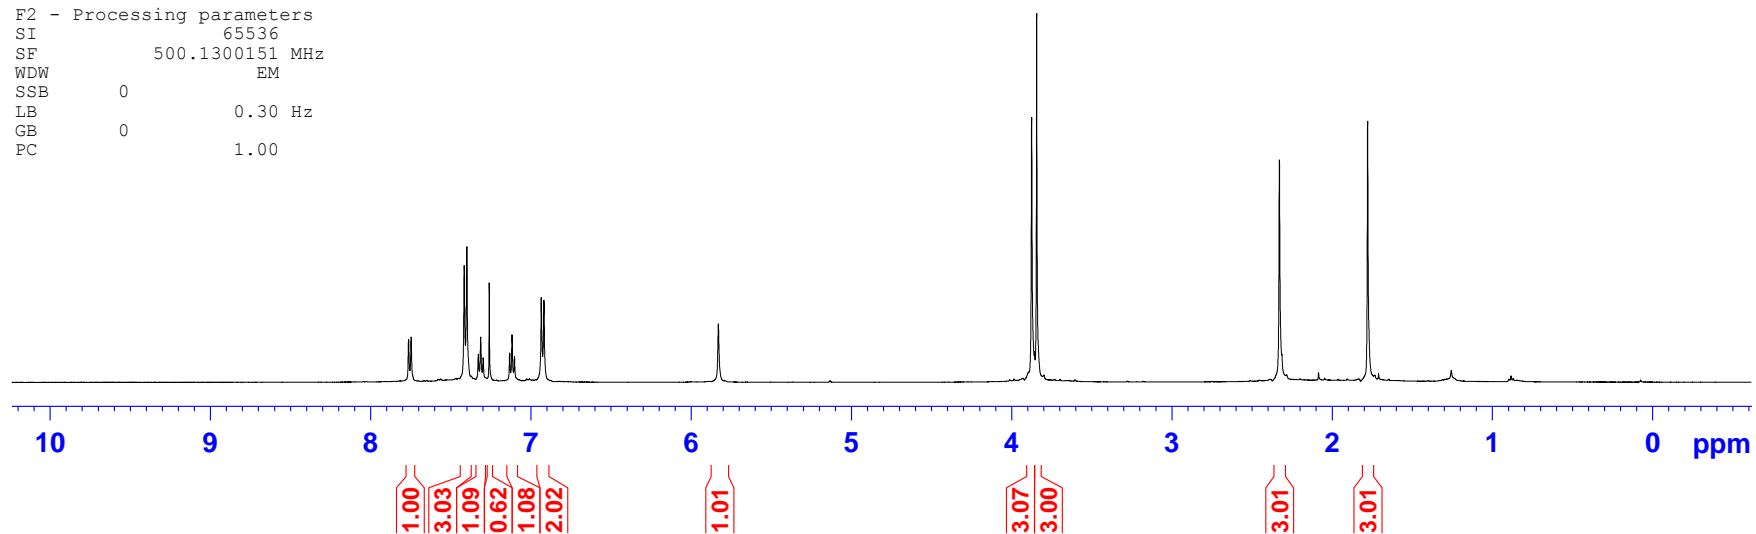

Figure S58. <sup>1</sup>H NMR Spectrum of 8

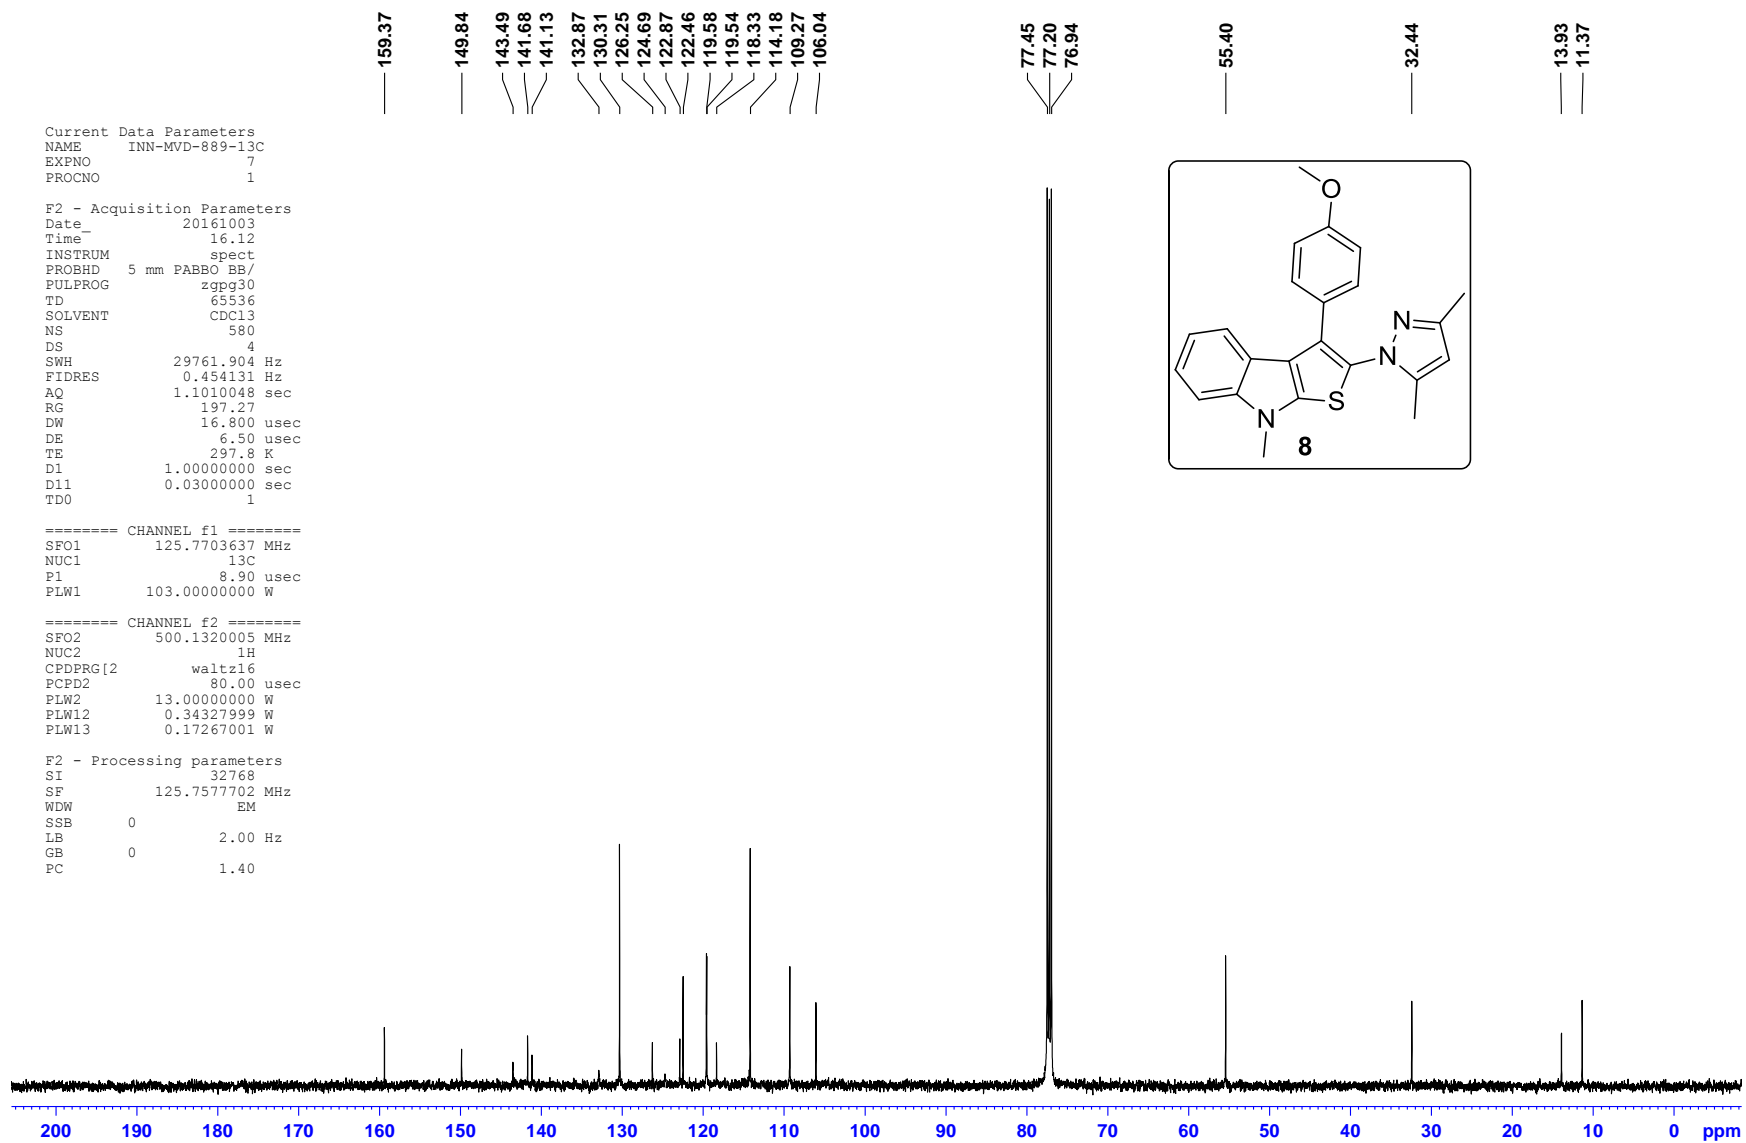

Figure S59. <sup>13</sup>C NMR Spectrum of **8**
